# Supplementary material for: A remarkable temperature effect in the desymmetrisation of bridged meso-tricyclic succinic anhydrides with chiral oxazolidin-2-ones
Source: Royal Society of Chemistry journal article supplement (doi:10.1039/c1ra00483b), 2011-01-01

## Supplementary Information

### <sup>1</sup>H and <sup>13</sup>C-NMR Spectra for

### **A remarkable temperature effect in the desymmetrization of bridged *meso*-tricyclic succinic anhydrides with chiral oxazolidin-2-ones**

Narendra R. Chaubey and Sunil K. Ghosh\*

Bio-Organic Division, Bhabha Atomic Research Centre, Mumbai 400085, INDIA

E-mail: [ghsunil@barc.gov.in](mailto:ghsunil@barc.gov.in)

#### **Table of Contents**

| Entry | Description                                            | Page |
|-------|--------------------------------------------------------|------|
| 1     | Figure-S1. <sup>1</sup> H NMR Spectrum of <b>5a</b>    | 3    |
| 2     | Figure-S2. <sup>13</sup> C NMR Spectrum of <b>5a</b>   | 4    |
| 3     | Figure-S3. <sup>1</sup> H NMR Spectrum of <b>6a</b>    | 5    |
| 4     | Figure-S4. <sup>13</sup> C NMR Spectrum of <b>6a</b>   | 6    |
| 5     | Figure-S5. <sup>1</sup> H NMR Spectrum of <b>5b</b>    | 7    |
| 6     | Figure-S6. <sup>13</sup> C NMR Spectrum of <b>5b</b>   | 8    |
| 7     | Figure-S7. <sup>1</sup> H NMR Spectrum of <b>6b</b>    | 9    |
| 8     | Figure-S8. <sup>13</sup> C NMR Spectrum of <b>6b</b>   | 10   |
| 9     | Figure-S9. <sup>1</sup> H NMR Spectrum of <b>5c</b>    | 11   |
| 10    | Figure-S10. <sup>13</sup> C NMR Spectrum of <b>5c</b>  | 12   |
| 11    | Figure-S11. <sup>1</sup> H NMR Spectrum of <b>6c</b>   | 13   |
| 12    | Figure-S12. <sup>13</sup> C NMR Spectrum of <b>6c</b>  | 14   |
| 13    | Figure-S13. <sup>1</sup> H NMR Spectrum of <b>5d</b>   | 15   |
| 14    | Figure-S14. <sup>13</sup> C NMR Spectrum of <b>5d</b>  | 16   |
| 15    | Figure-S15. <sup>1</sup> H NMR Spectrum of <b>6d</b>   | 17   |
| 16    | Figure-S16. <sup>13</sup> C NMR Spectrum of <b>6d</b>  | 18   |
| 17    | Figure-S17. <sup>1</sup> H NMR Spectrum of <b>7a</b>   | 19   |
| 18    | Figure-S18. <sup>13</sup> C NMR Spectrum of <b>7a</b>  | 20   |
| 19    | Figure-S19. <sup>1</sup> H NMR Spectrum of <b>8a</b>   | 21   |
| 20    | Figure-S20. <sup>13</sup> C NMR Spectrum of <b>8a</b>  | 22   |
| 21    | Figure-S21. <sup>1</sup> H NMR Spectrum of <b>10a</b>  | 23   |
| 22    | Figure-S22. <sup>13</sup> C NMR Spectrum of <b>10a</b> | 24   |
| 23    | Figure-S23. <sup>1</sup> H NMR Spectrum of <b>11a</b>  | 25   |
| 24    | Figure-S24. <sup>13</sup> C NMR Spectrum of <b>11a</b> | 26   |
| 25    | Figure-S25. <sup>1</sup> H NMR Spectrum of <b>11b</b>  | 27   |
| 26    | Figure-S26. <sup>13</sup> C NMR Spectrum of <b>11b</b> | 28   |

| Entry | Description                                            | Page |
|-------|--------------------------------------------------------|------|
| 27    | Figure-S27. <sup>1</sup> H NMR Spectrum of <b>12b</b>  | 29   |
| 28    | Figure-S28. <sup>13</sup> C NMR Spectrum of <b>12b</b> | 30   |
| 29    | Figure-S29. <sup>1</sup> H NMR Spectrum of <b>11c</b>  | 31   |
| 30    | Figure-S30. <sup>13</sup> C NMR Spectrum of <b>11c</b> | 32   |
| 31    | Figure-S31. <sup>1</sup> H NMR Spectrum of <b>12c</b>  | 33   |
| 32    | Figure-S32. <sup>13</sup> C NMR Spectrum of <b>12c</b> | 34   |
| 33    | Figure-S33. <sup>1</sup> H NMR Spectrum of <b>11d</b>  | 35   |
| 34    | Figure-S34. <sup>13</sup> C NMR Spectrum of <b>11d</b> | 36   |
| 35    | Figure-S35. <sup>1</sup> H NMR Spectrum of <b>12d</b>  | 37   |
| 36    | Figure-S36. <sup>13</sup> C NMR Spectrum of <b>12d</b> | 38   |
| 37    | Figure-S37. <sup>1</sup> H NMR Spectrum of <b>11e</b>  | 39   |
| 38    | Figure-S38. <sup>13</sup> C NMR Spectrum of <b>11e</b> | 40   |
| 39    | Figure-S39. <sup>1</sup> H NMR Spectrum of <b>11f</b>  | 41   |
| 40    | Figure-S40. <sup>13</sup> C NMR Spectrum of <b>11f</b> | 42   |
| 41    | Figure-S41. <sup>1</sup> H NMR Spectrum of <b>13</b>   | 43   |
| 42    | Figure-S42. <sup>13</sup> C NMR Spectrum of <b>13</b>  | 44   |
| 43    | Figure-S43. <sup>1</sup> H NMR Spectrum of <b>15a</b>  | 45   |
| 44    | Figure-S44. <sup>13</sup> C NMR Spectrum of <b>15a</b> | 46   |
| 45    | Figure-S45. <sup>1</sup> H NMR Spectrum of <b>16a</b>  | 47   |
| 46    | Figure-S46. <sup>13</sup> C NMR Spectrum of <b>16a</b> | 48   |
| 47    | Figure-S47. <sup>1</sup> H NMR Spectrum of <b>15b</b>  | 49   |
| 48    | Figure-S48. <sup>13</sup> C NMR Spectrum of <b>15b</b> | 50   |
| 49    | Figure-S49. <sup>1</sup> H NMR Spectrum of <b>16b</b>  | 51   |
| 50    | Figure-S50. <sup>13</sup> C NMR Spectrum of <b>16b</b> | 52   |

Figure-S1. <sup>1</sup>H NMR spectrum of compound **5a**

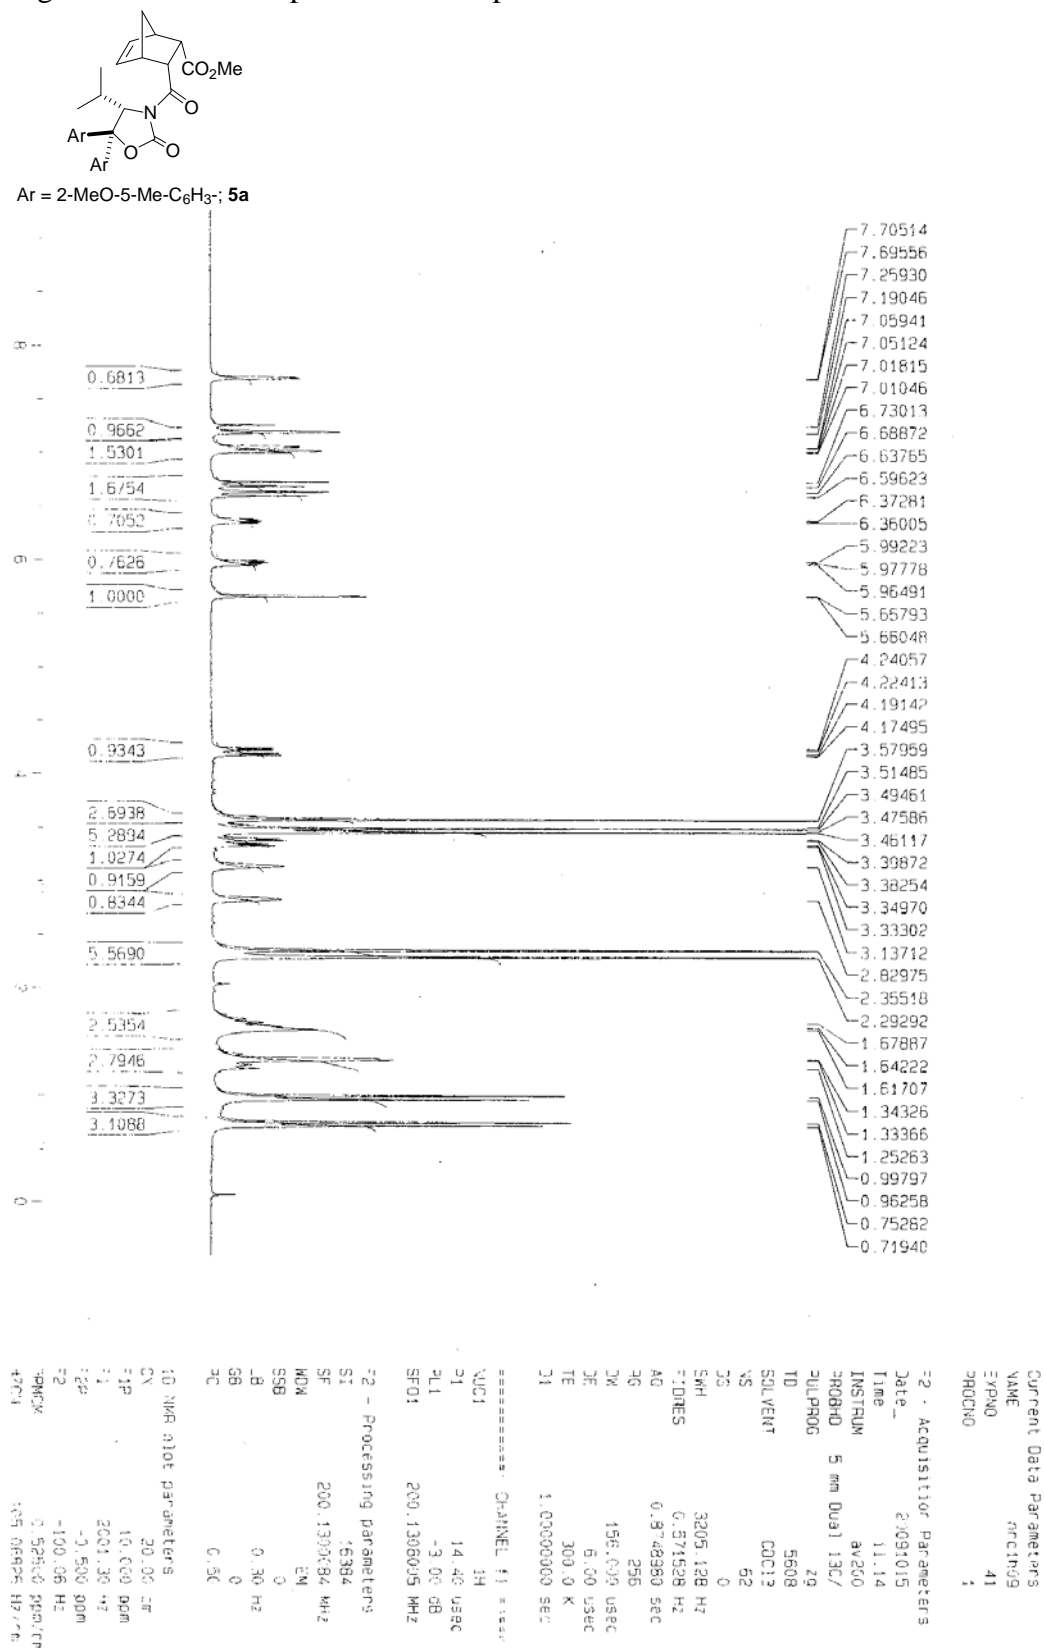

Figure-S2. <sup>13</sup>C NMR spectrum of compound 5a

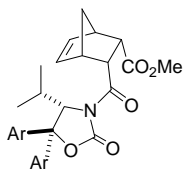

Ar = 2-MeO-5-Me-C<sub>6</sub>H<sub>3</sub>; 5a

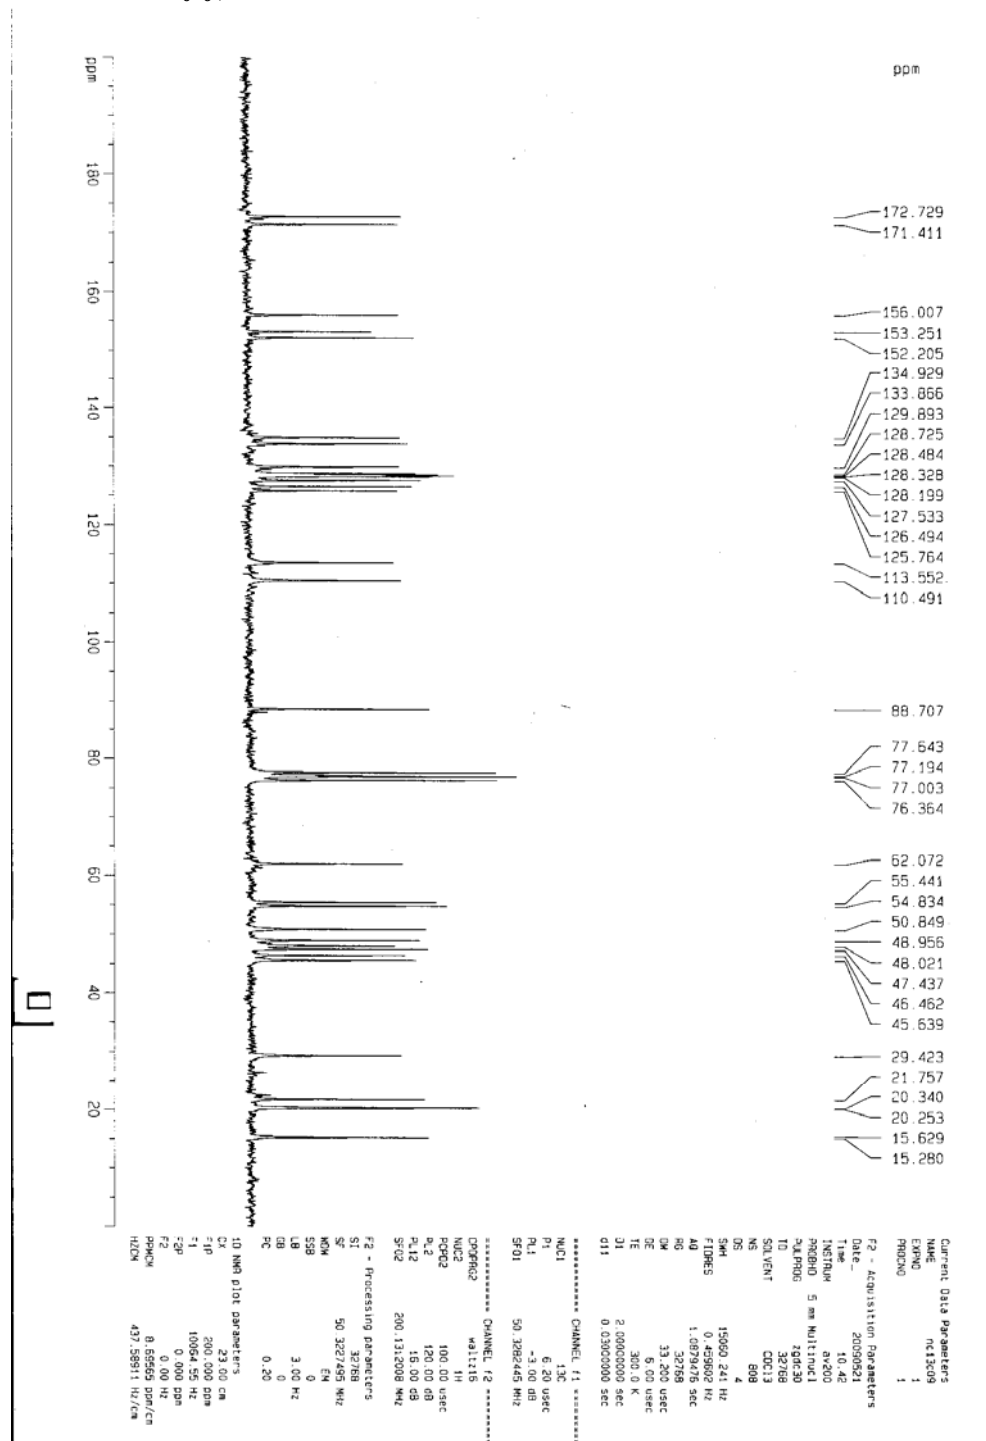

Figure-S3. <sup>1</sup>H NMR spectrum of compound **6a**

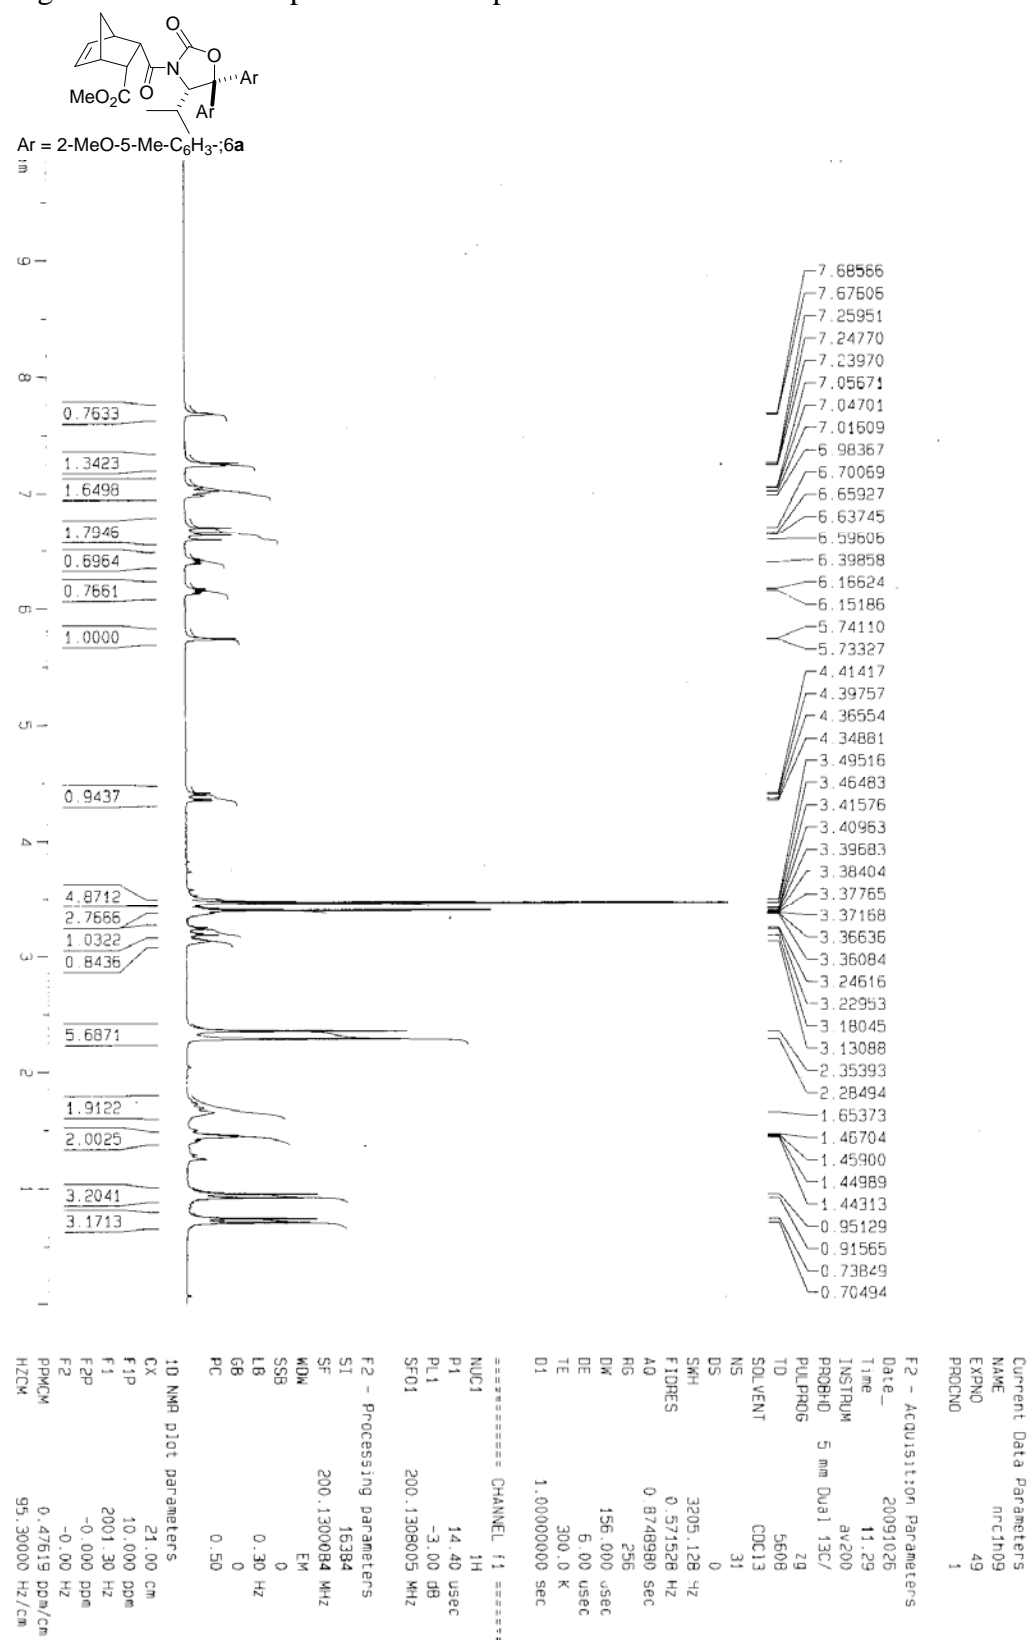

Figure-S4.  $^{13}\text{C}$  NMR spectrum of compound **6a**

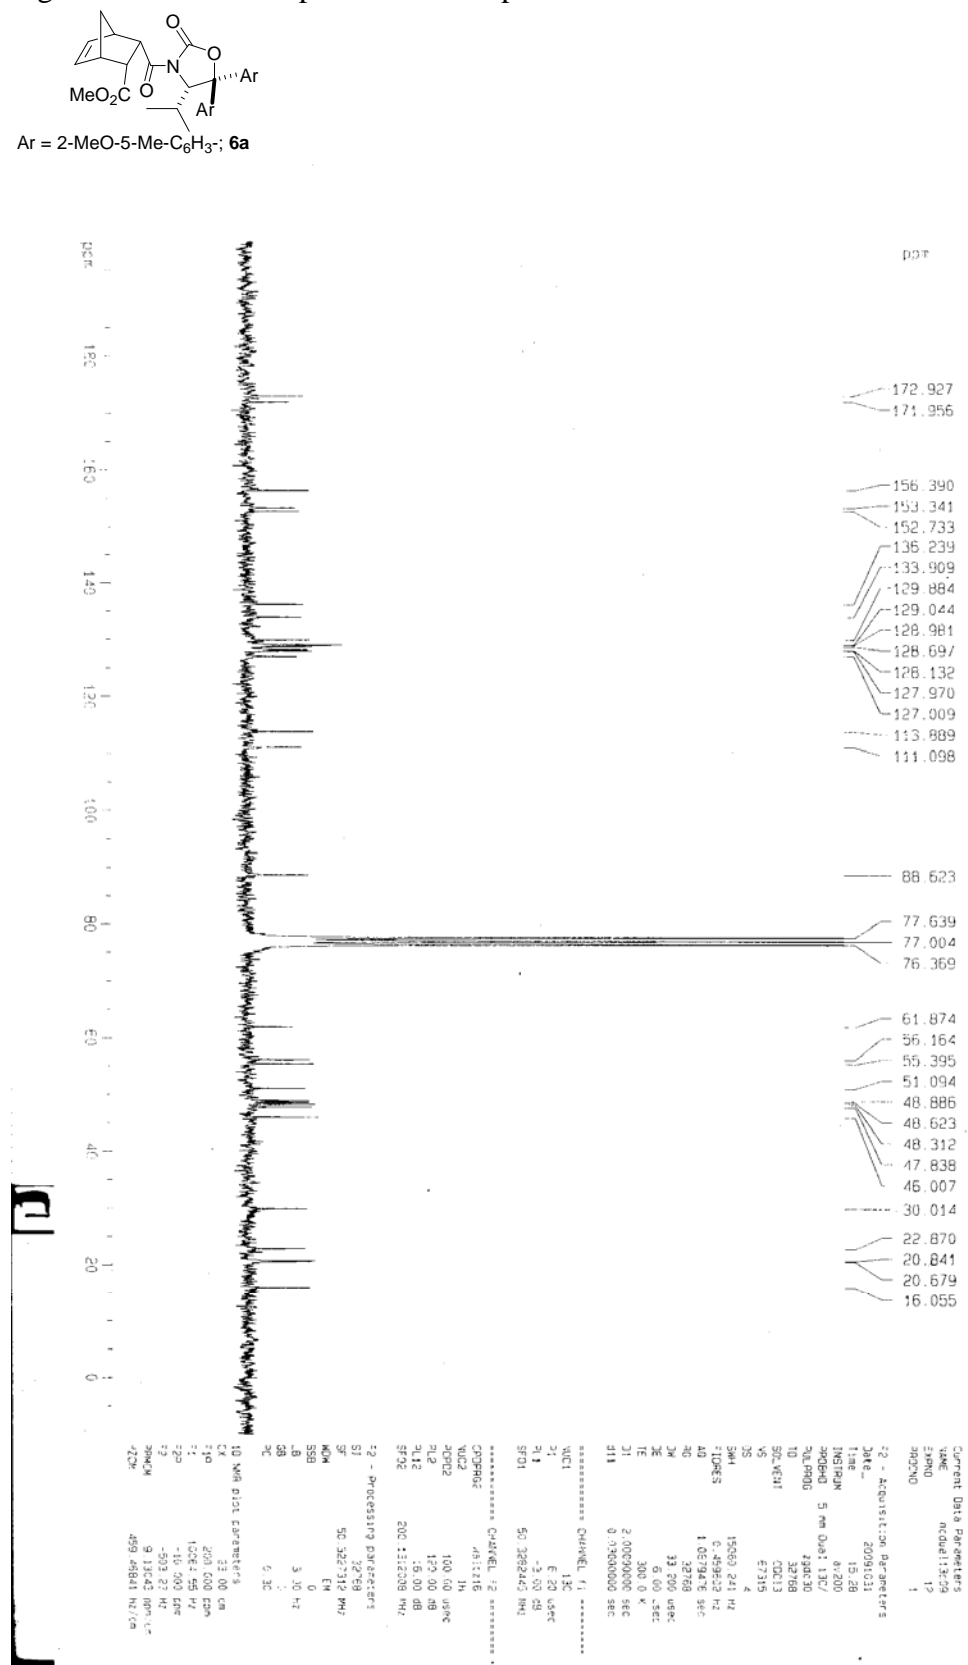

Figure-S5. <sup>1</sup>H NMR spectrum of compound **5b**

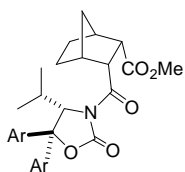

Ar = 2-MeO-5-Me-C<sub>6</sub>H<sub>3</sub>; **5b**

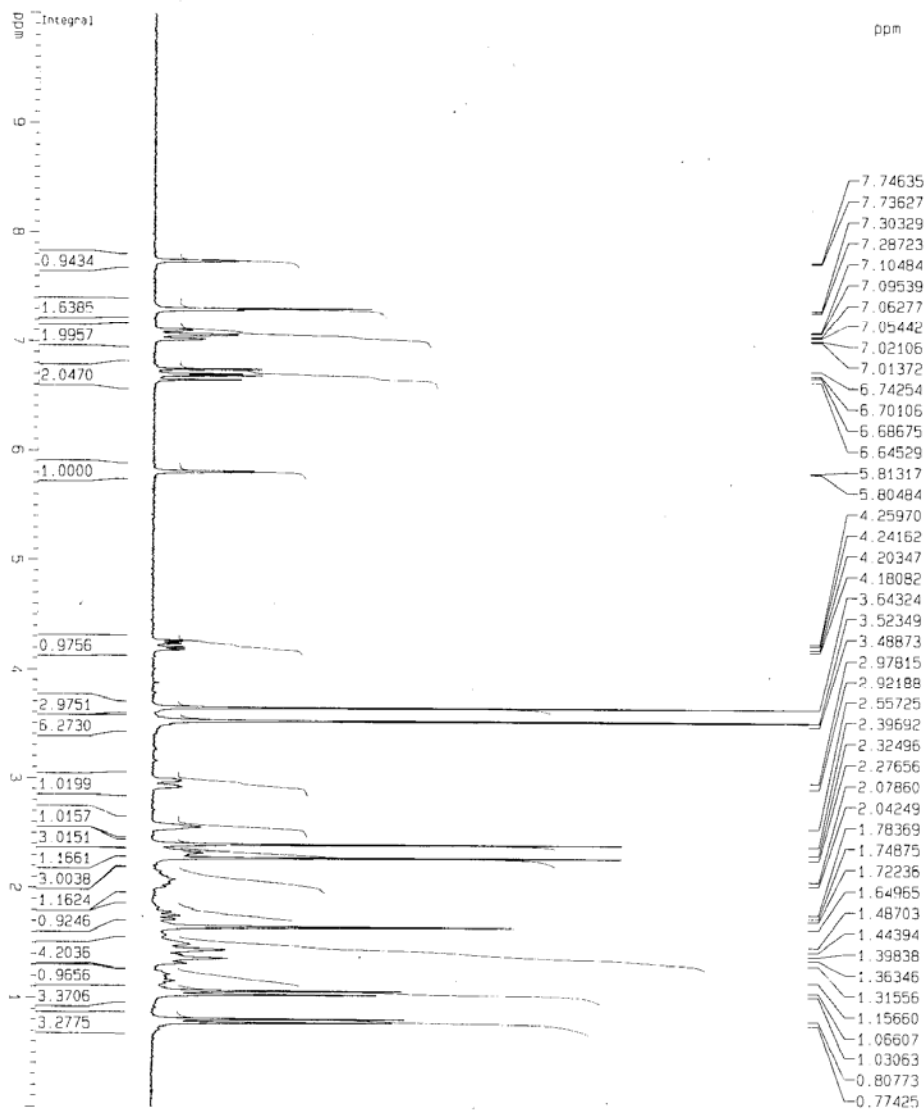

```

Current Data Parameters
NAME          FC-06-810
EXPNO        5
PROCNO       1

F2 - Acquisition Parameters
Date_         20100719
Time          15:22
INSTRUM      spect
PROBHD       5 mm Dual 13C/
PULPROG      zgpg30
TD           26850
SOLVENT      CDCl3
NS           24
DS           0
SWH          6176.652 Hz
FIDRES      0.250168 Hz
AQ           1.9987025 sec
RG           656
DM           80.000 usec
DE           115.00 usec
TE           0.0
AQREST      1.0000000 sec
MCREST      0.0000000 sec
MCMSK      0.01500000 sec

***** CHANNEL f1 *****
NUC1         1H
PI           14.40 usec
PL           -3.00 dB
SFO1         200.1360200 MHz

F2 - Processing parameters
SI           16384
SF           200.1360000 MHz
WDW          EM
SSB          0
LB           3.30 Hz
GB           0
PC           1.00

1D NMR plot parameters
CX           21.00 cm
CY           15.00 cm
F1P          10.000 DPM
F2P          2001.30 Hz
F3P          -0.000 Hz
PC136       0.4755 DPM/cm
PC137       95.30000 Hz/cm
    
```

Figure-S6.  $^{13}\text{C}$  NMR spectrum of compound **5b**

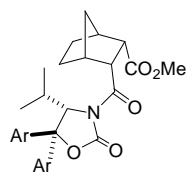

Ar = 2-MeO-5-Me-C<sub>6</sub>H<sub>3</sub>-; **5b**

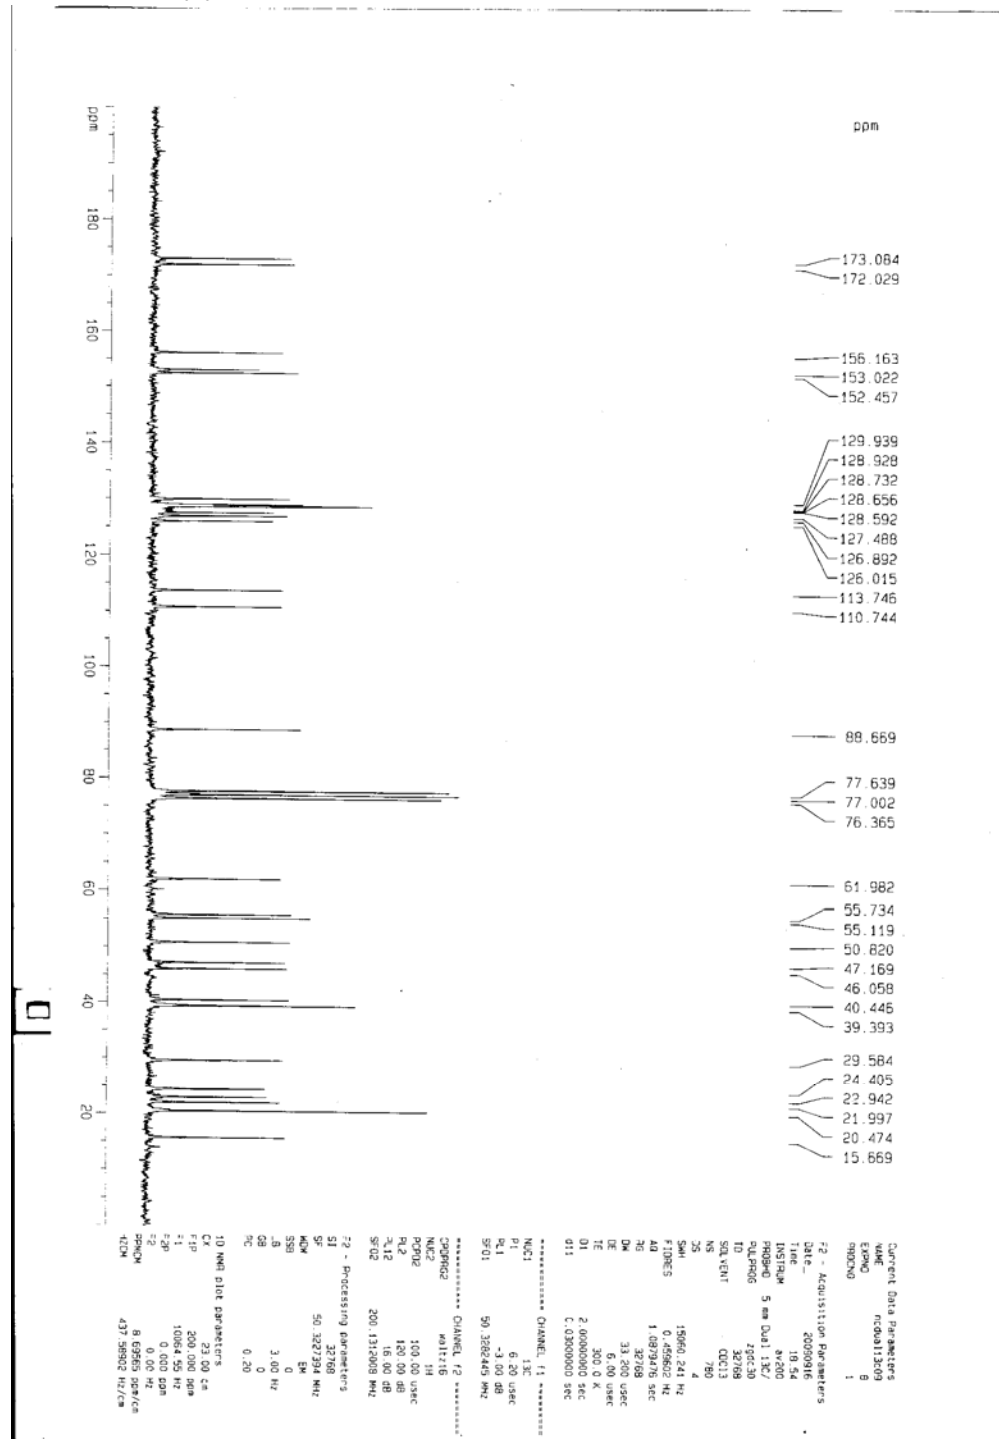



Figure-S7. <sup>1</sup>H NMR spectrum of compound **6b**

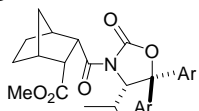

Ar = 2-MeO-5-Me-C<sub>6</sub>H<sub>3</sub>; **6b**

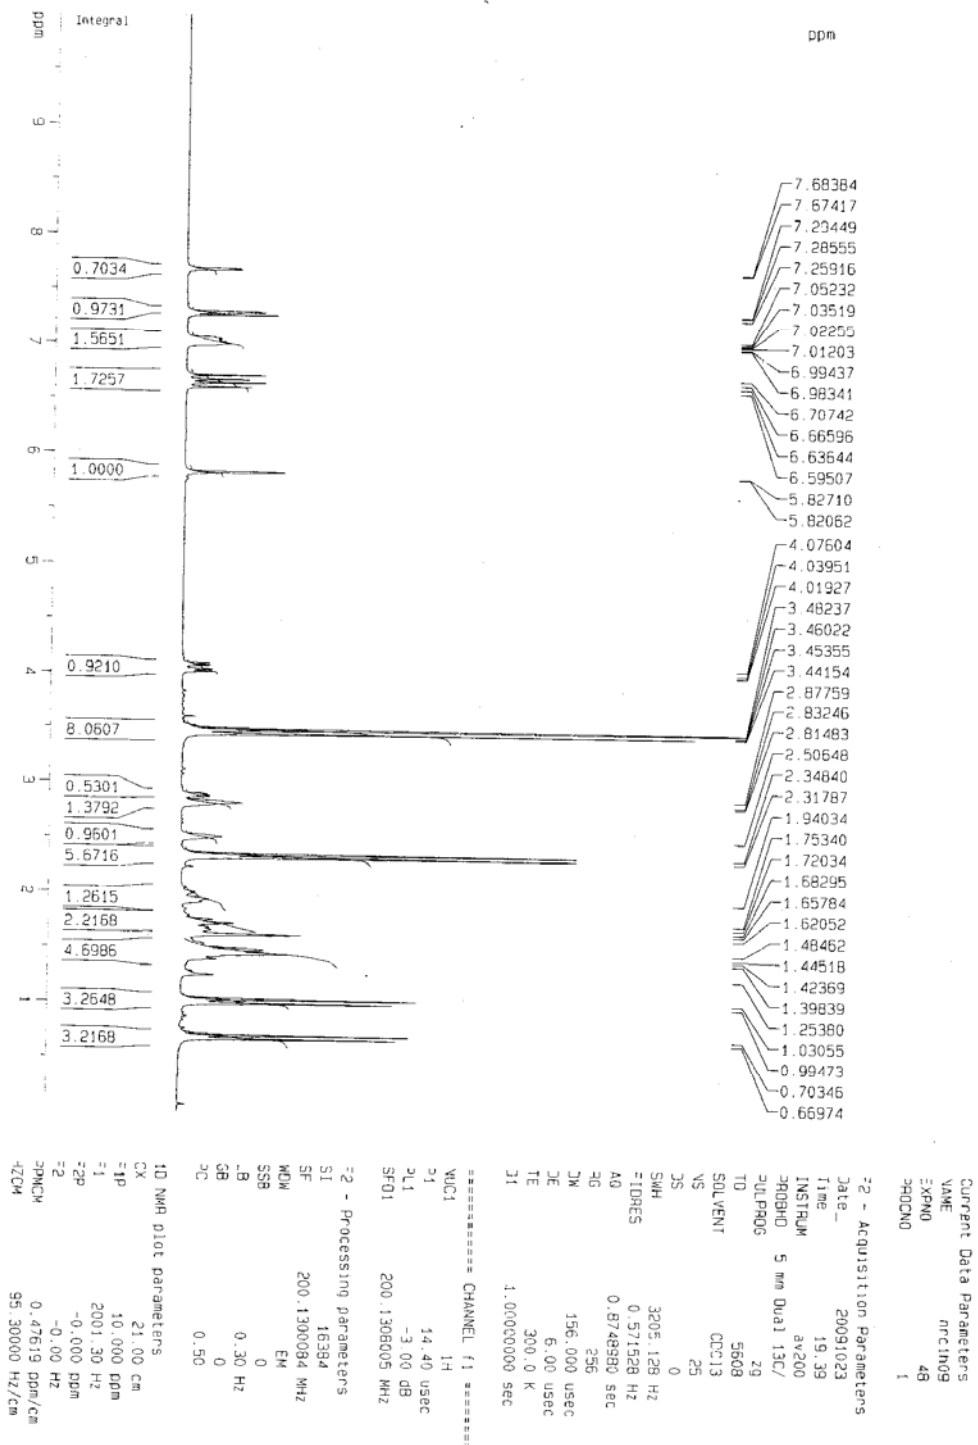

Figure-S8. <sup>13</sup>C NMR spectrum of compound **6b**



Ar = 2-MeO-5-Me-C<sub>6</sub>H<sub>3</sub>; **6b**

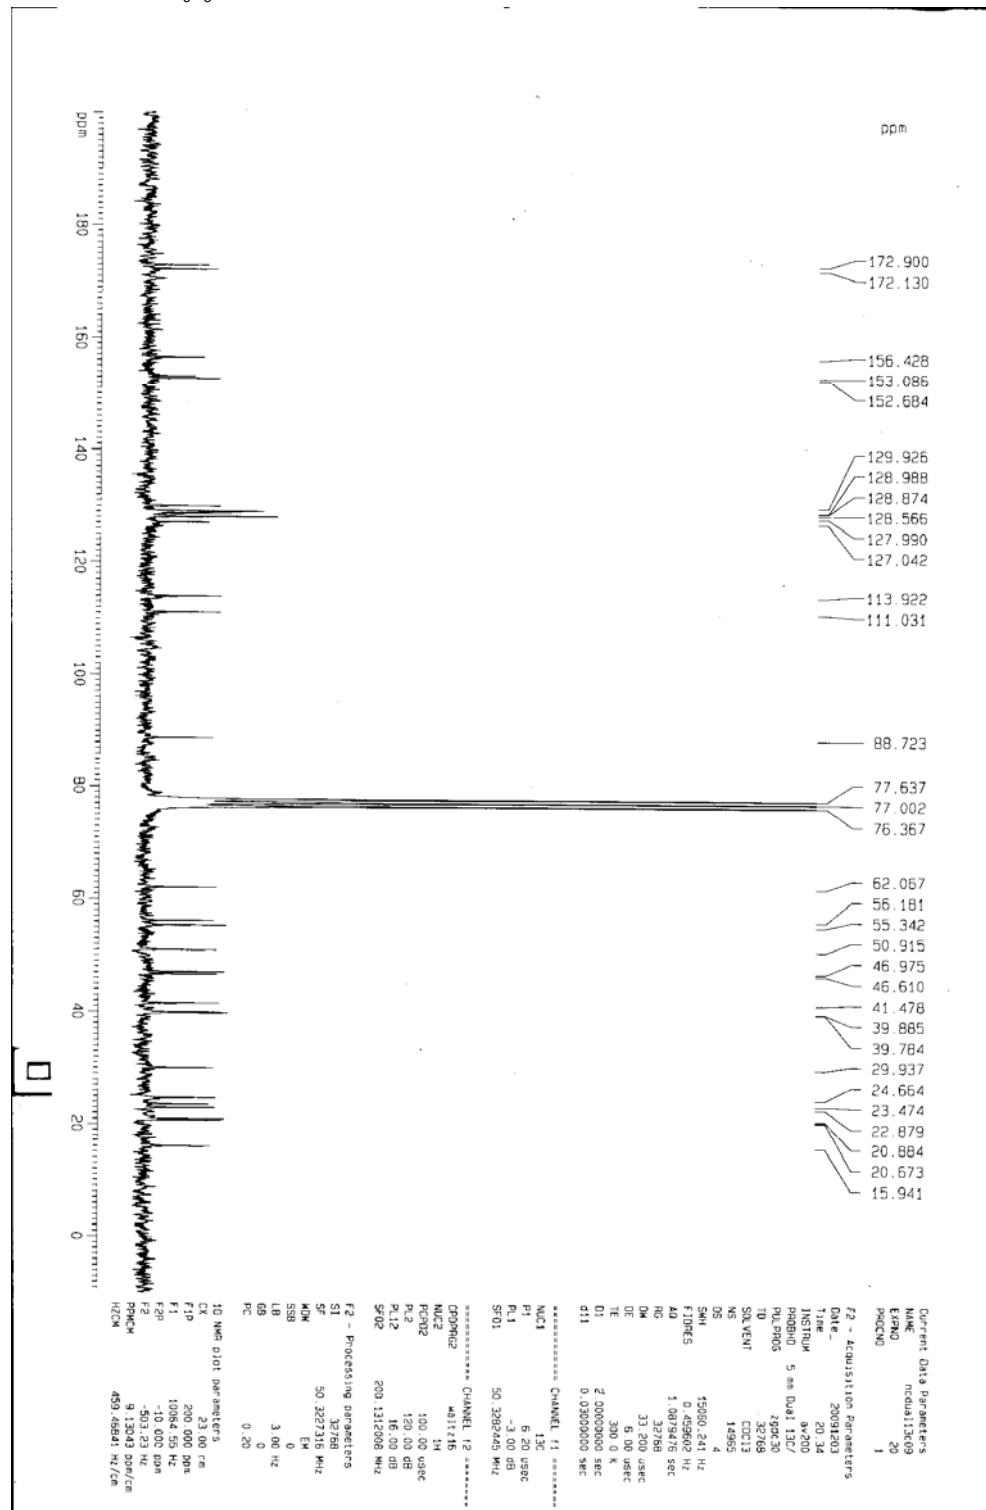

Figure-S9. <sup>1</sup>H NMR spectrum of compound **5c**

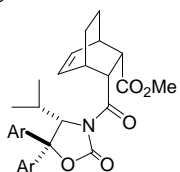

Ar = 2-MeO-5-Me-C<sub>6</sub>H<sub>3</sub>-, **5c**

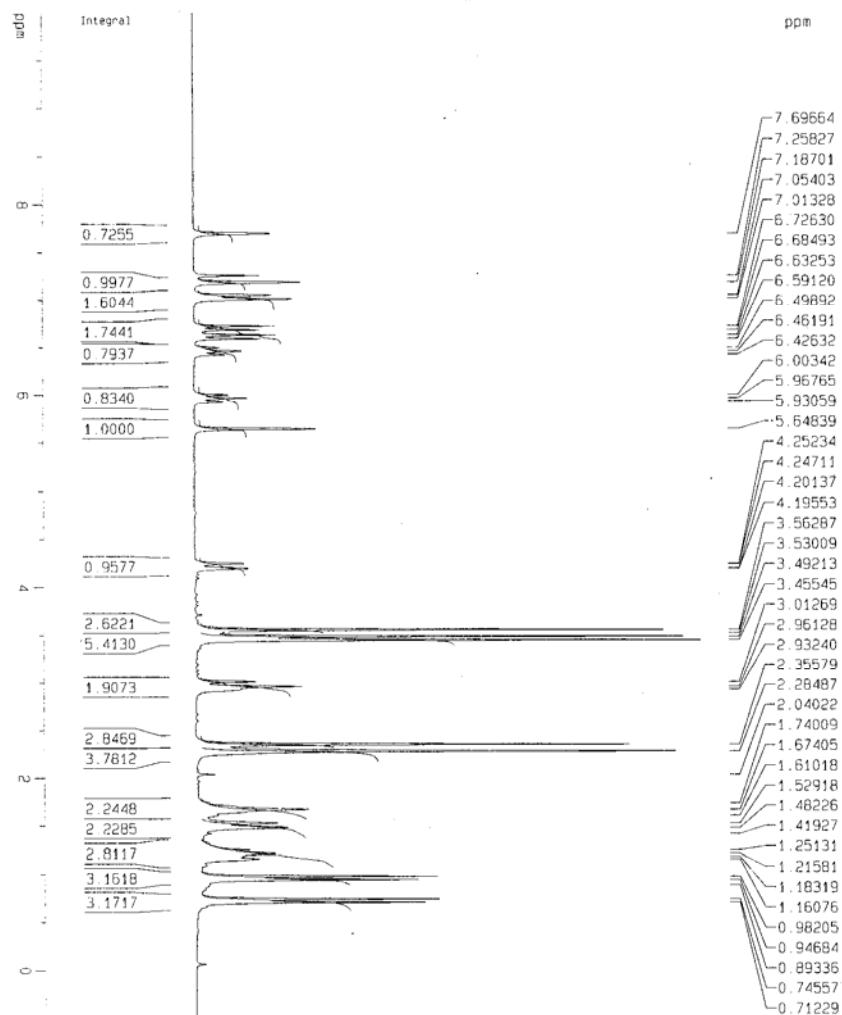

```

Current Data Parameters
NAME      nrc1n09
EXPNO    39
PROCNO   1

F2 - Acquisition Parameters
Date_    20091007
Time     16.40
INSTRUM  av200
PROBHD   5 mm QNP 13C/
PULPROG  zgpg30
TD        65536
SOLVENT  CDCl3
VS        24
SFO1     100.628150 MHz
SFO2     125.761360 MHz
SMH      3205.128 Hz
FIDRES   0.571528 Hz
AQ        0.8748980 sec
RG         256
AQ        156.000 usec
DE        6.00 usec
TE        300.2 K
JE        1.00000000 sec
J1

===== CHANNEL f1 =====
NUC1      1H
P1        14.40 usec
PL1       -3.00 dB
SFO1      200.1308005 MHz

F2 - Processing parameters
SI         16384
SF         200.1300084 MHz
WDW         EM
SSB         0
GB         0.33 Hz
GB         0
PC         0.50

10 NMR plot parameters
CX         20.00 cm
CP         10.000 ppm
F1         2001.30 Hz
F2         -0.500 ppm
PCMCN     -100.006 Hz
PCMCN     0.52506 ppm/cm
ZCM       105.06825 Hz/cm
    
```

Figure-S10. <sup>13</sup>C NMR spectrum of compound 5c

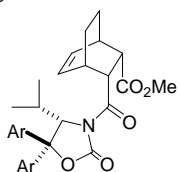

Ar = 2-MeO-5-Me-C<sub>6</sub>H<sub>3</sub>; 5c

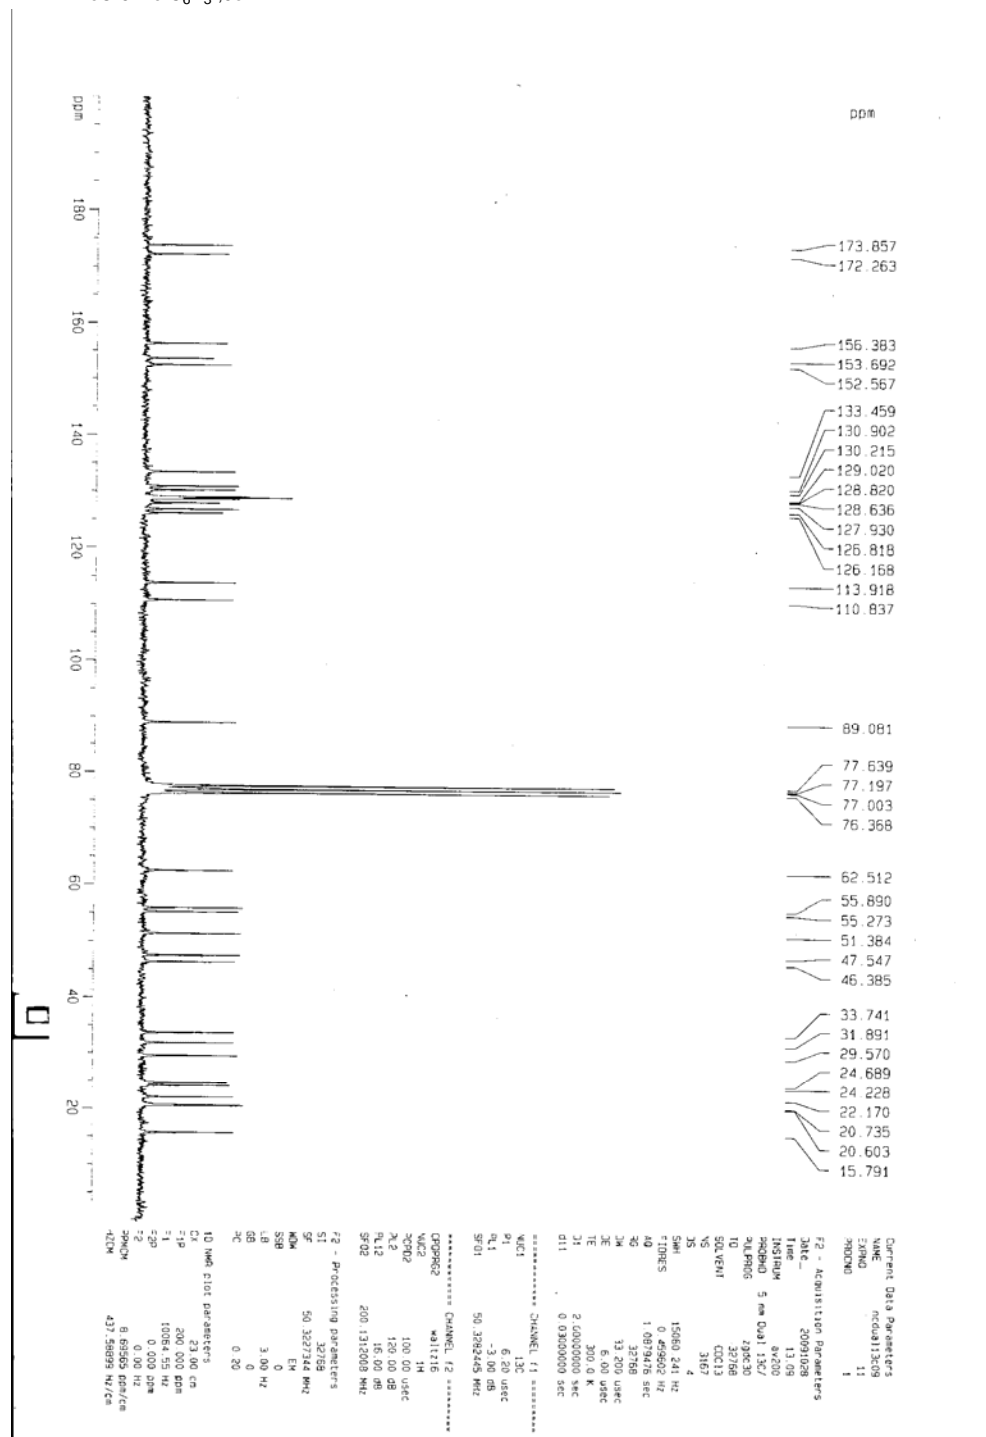

Figure-S11. <sup>1</sup>H NMR spectrum of compound **6c**

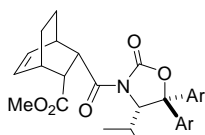

Ar = 2-MeO-5-Me-C<sub>6</sub>H<sub>3</sub>; **6c**

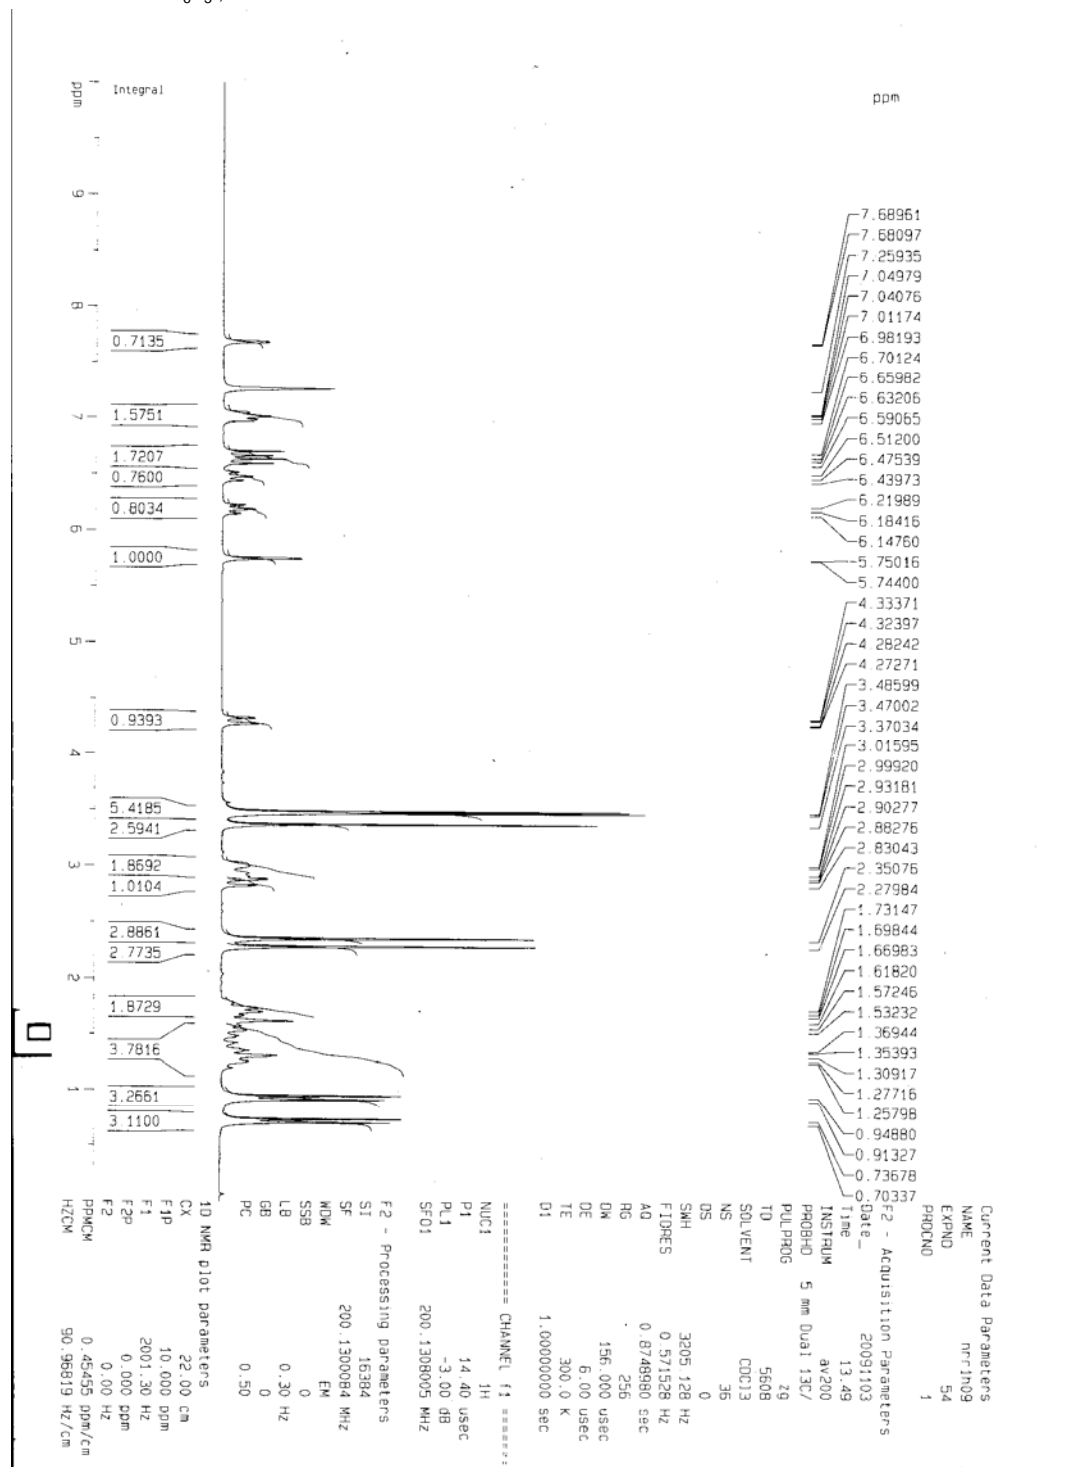

Figure-S12. <sup>13</sup>C NMR spectrum of compound **6c**



Ar = 2-MeO-5-Me-C<sub>6</sub>H<sub>3</sub>;

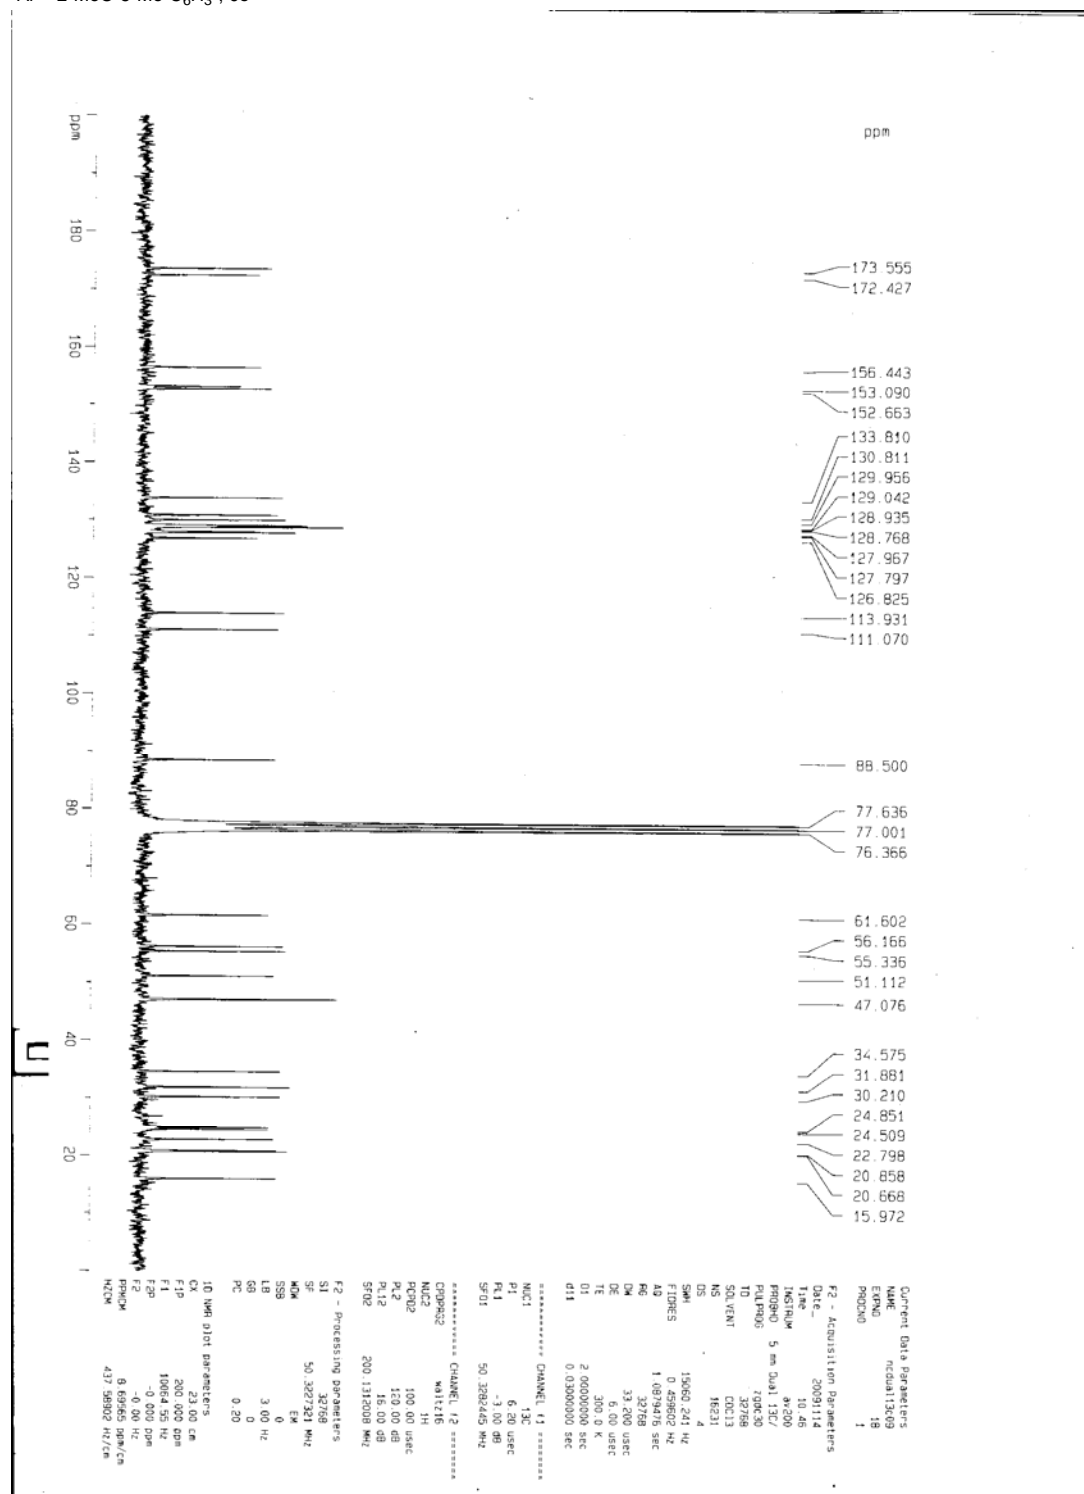

Figure-S13. <sup>1</sup>H NMR spectrum of compound **5d**

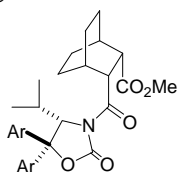

Ar = 2-MeO-5-Me-C<sub>6</sub>H<sub>3</sub>; **5d**

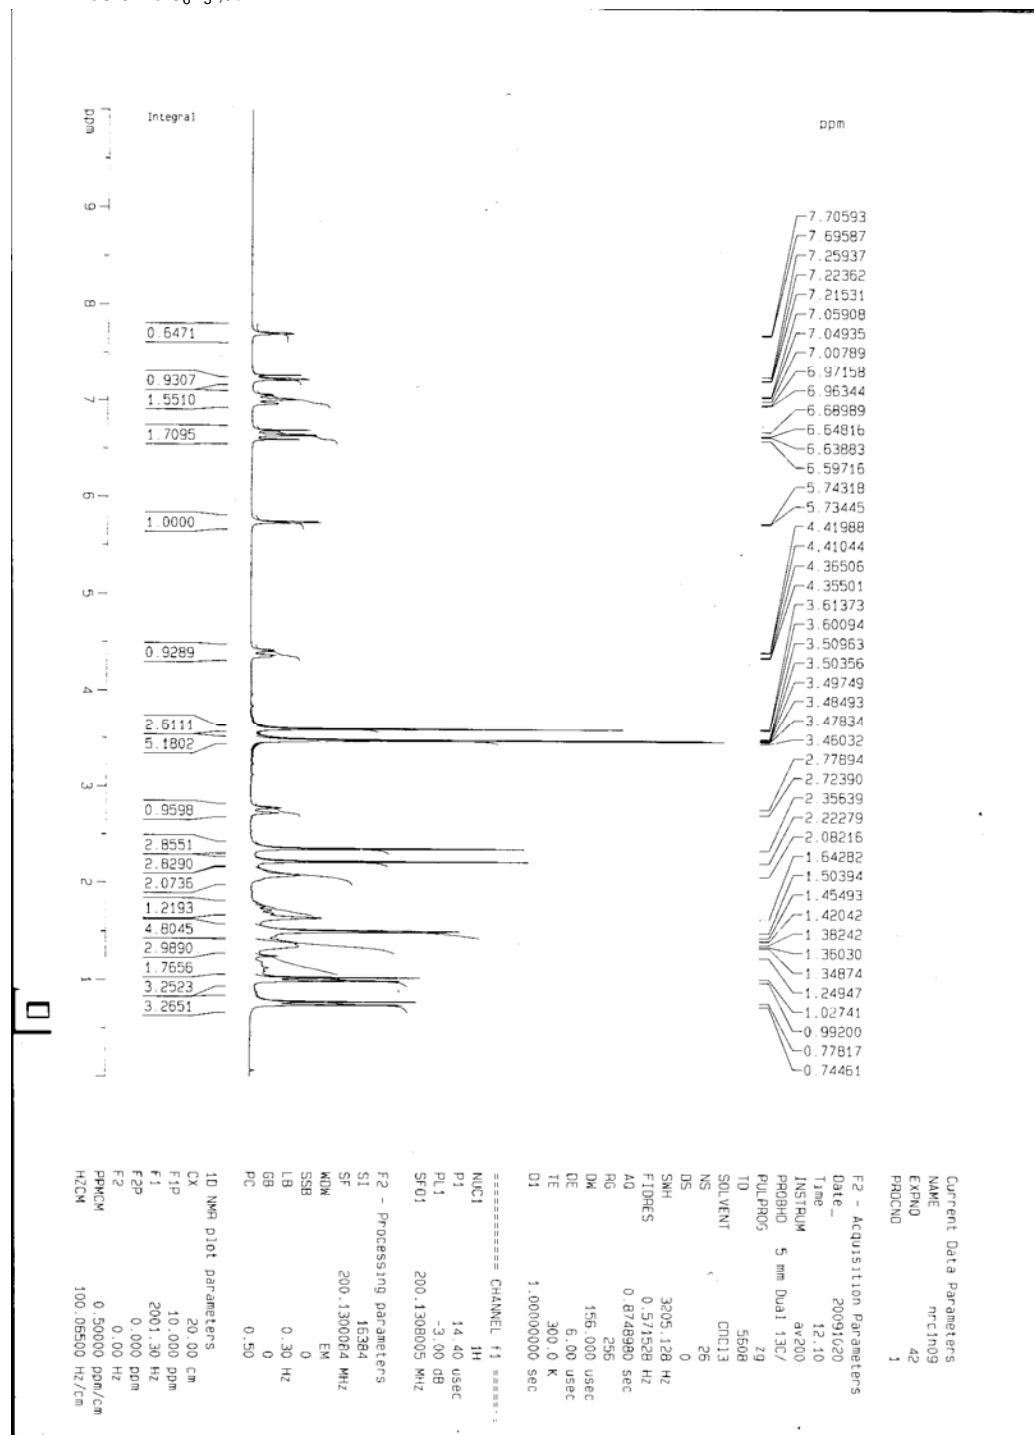

Figure-S14. <sup>13</sup>C NMR spectrum of compound **5d**

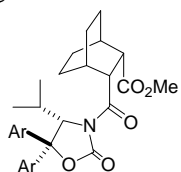

Ar = 2-MeO-5-Me-C<sub>6</sub>H<sub>3</sub>; **5d**

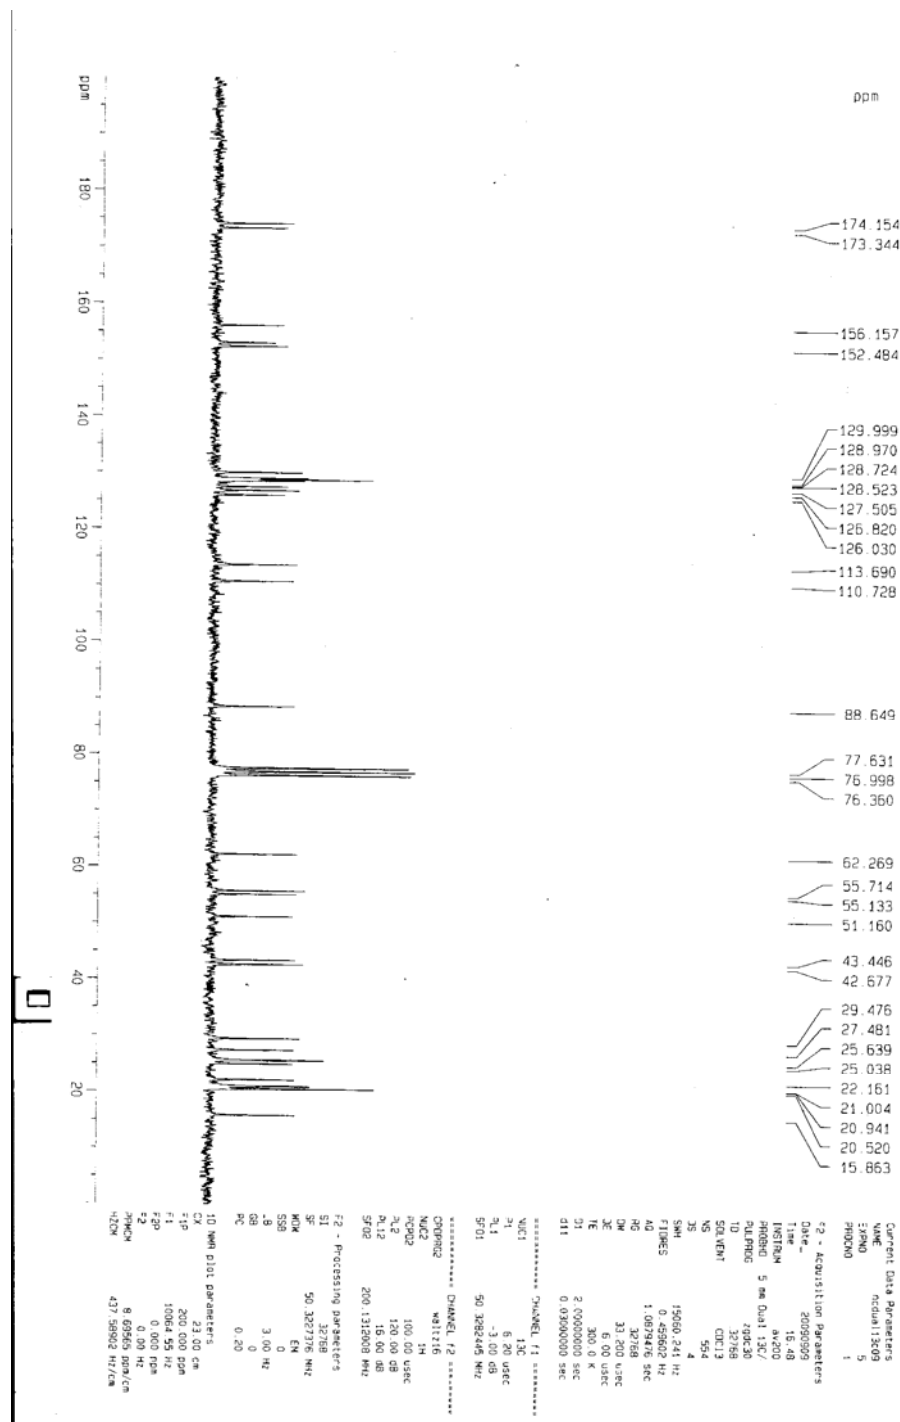



Figure-S15. <sup>1</sup>H NMR spectrum of compound **6d**

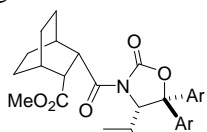

Ar = 2-MeO-5-Me-C<sub>6</sub>H<sub>3</sub>;

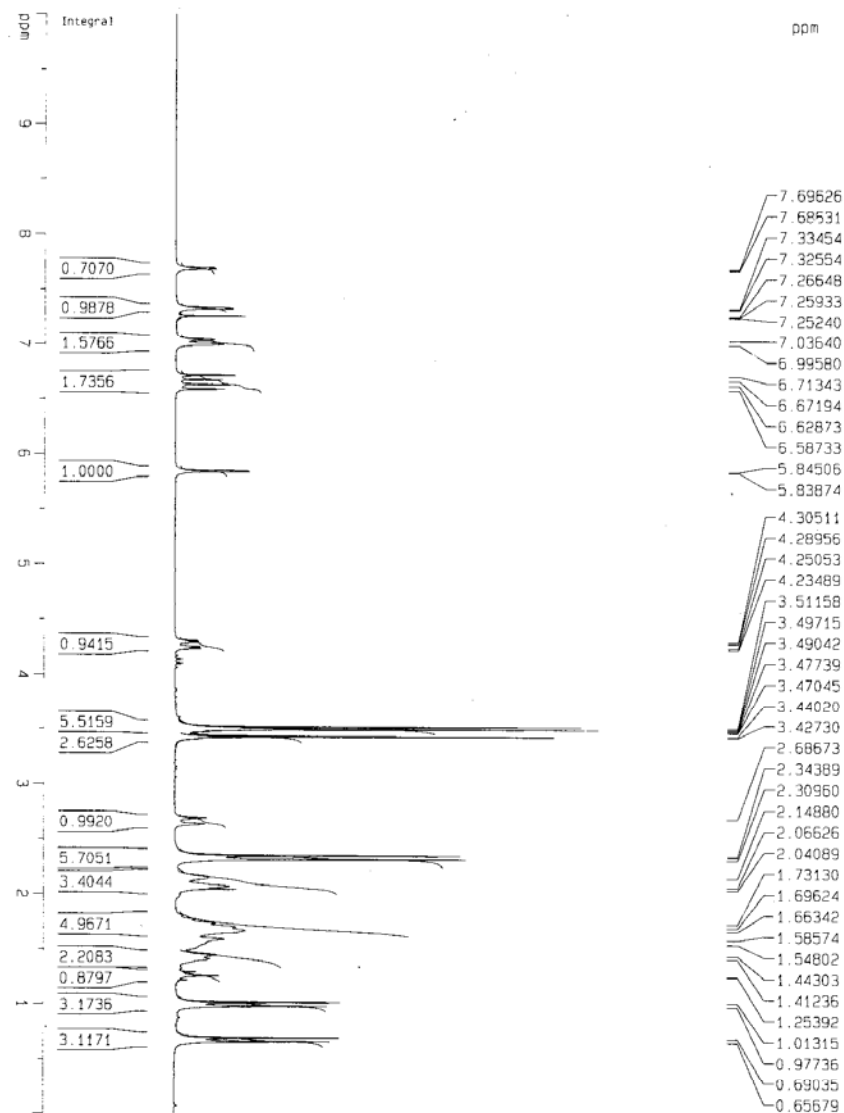

Current Data Parameters  
 NAME nrc1h09  
 EXPNO 47  
 PROCNO 1

F2 - Acquisition Parameters  
 Date\_ 20091022  
 Time 18.01  
 INSTRUM av200  
 PROBHD 5 mm Dual 13C/  
 PULPROG zg  
 TD 6608  
 SOLVENT CDCl3  
 NS 24  
 DS 0  
 SMH 3205.128 Hz  
 FIDRES 0.571528 Hz  
 AQ 0.8746980 sec  
 RG 256  
 DE 156.000 usec  
 TE 300.0 K  
 D1 1.00000000 sec

===== CHANNEL f1 =====  
 NUC1 1H  
 P1 14.40 usec  
 PL1 -3.00 dB  
 SF01 200.1308005 MHz

F2 - Processing parameters  
 SI 16384  
 SF 200.1300084 MHz  
 WDW EM  
 SSB 0  
 LB 0.30 Hz  
 GB 0  
 PC 0.50

1D NMR plot parameters  
 CX 21.00 cm  
 F1p 10.000 ppm  
 F1 2001.30 Hz  
 F2p -0.000 ppm  
 F2 -0.00 Hz  
 PPM/CM 0.47519 ppm/cm  
 HZ/CM 95.30000 Hz/cm

Figure-S16. <sup>13</sup>C NMR spectrum of compound **6d**

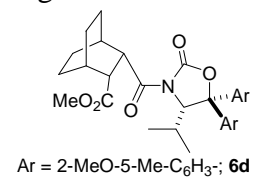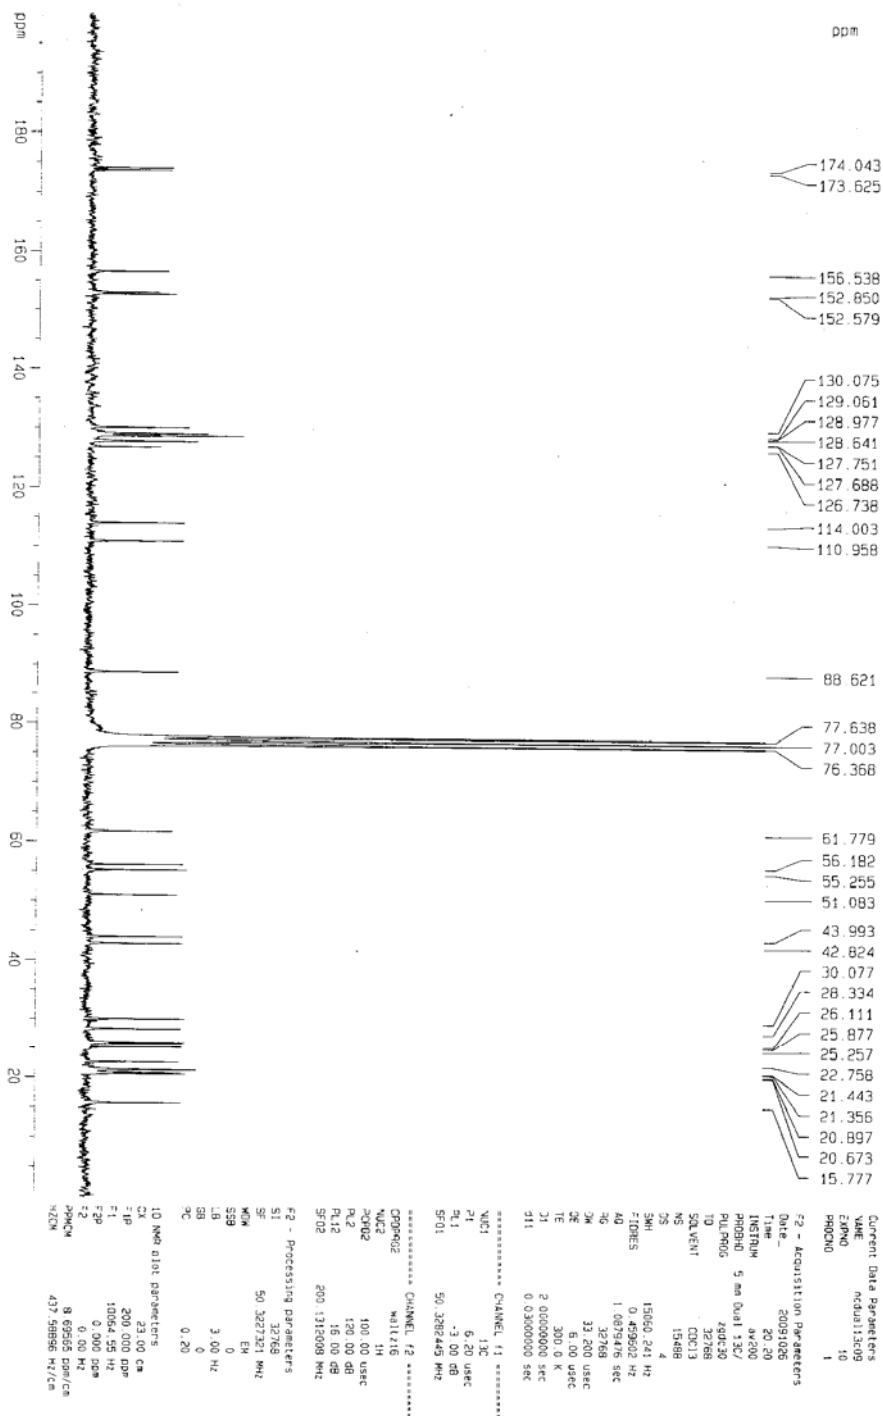

Figure-S17. <sup>1</sup>H NMR spectrum of compound **7a**

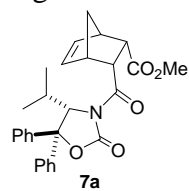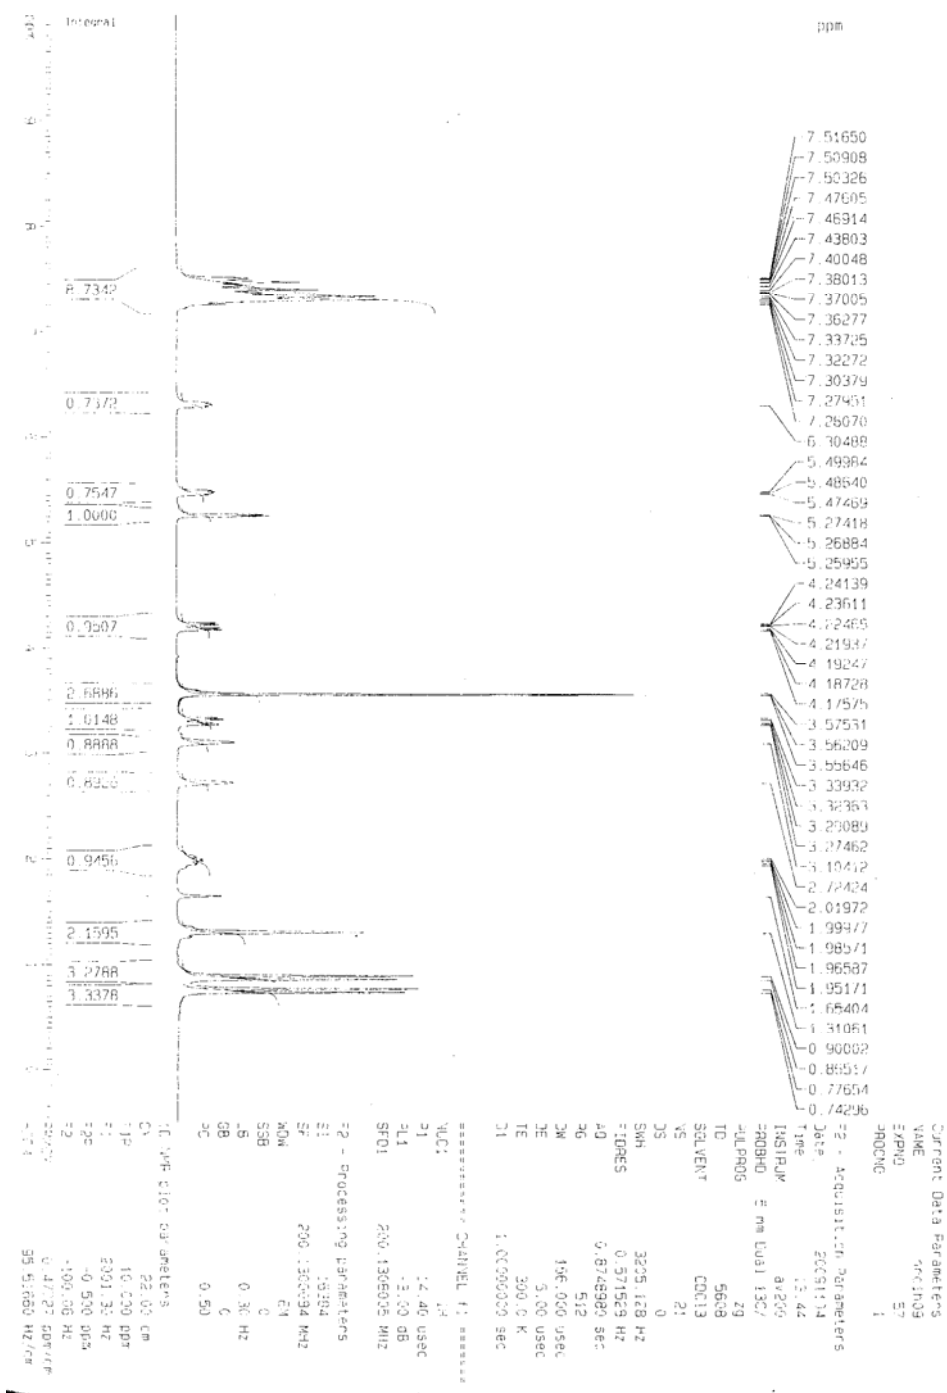

Figure-S18.  $^{13}\text{C}$  NMR spectrum of compound **7a**

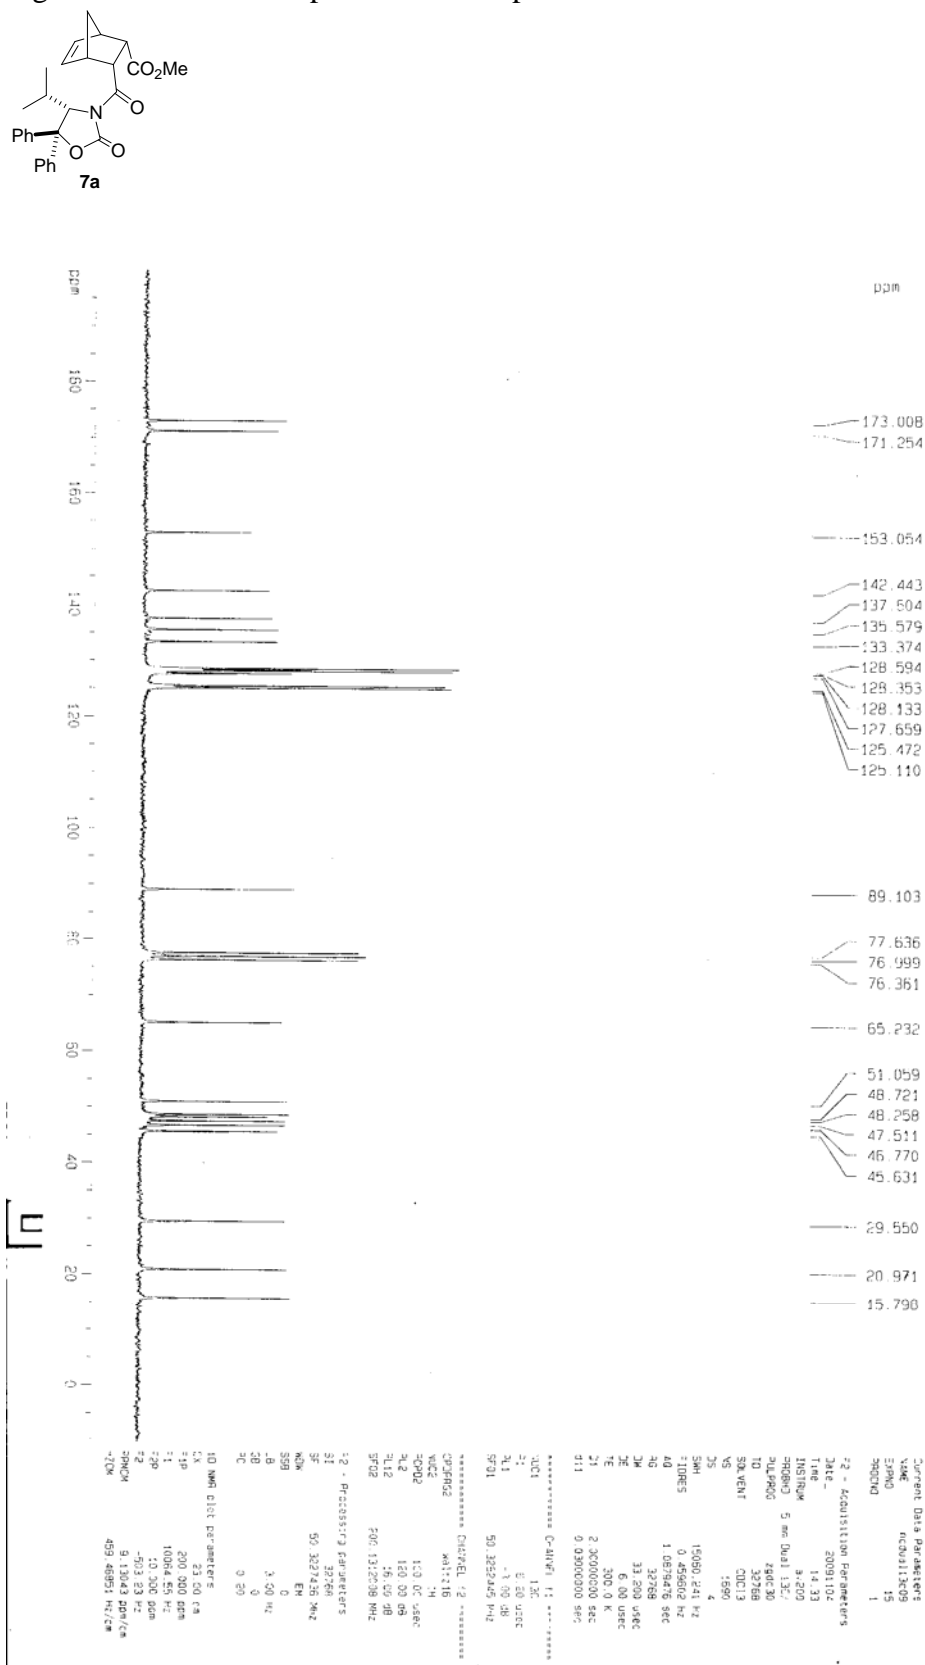

Figure-S19. <sup>1</sup>H NMR spectrum of compound **8a**

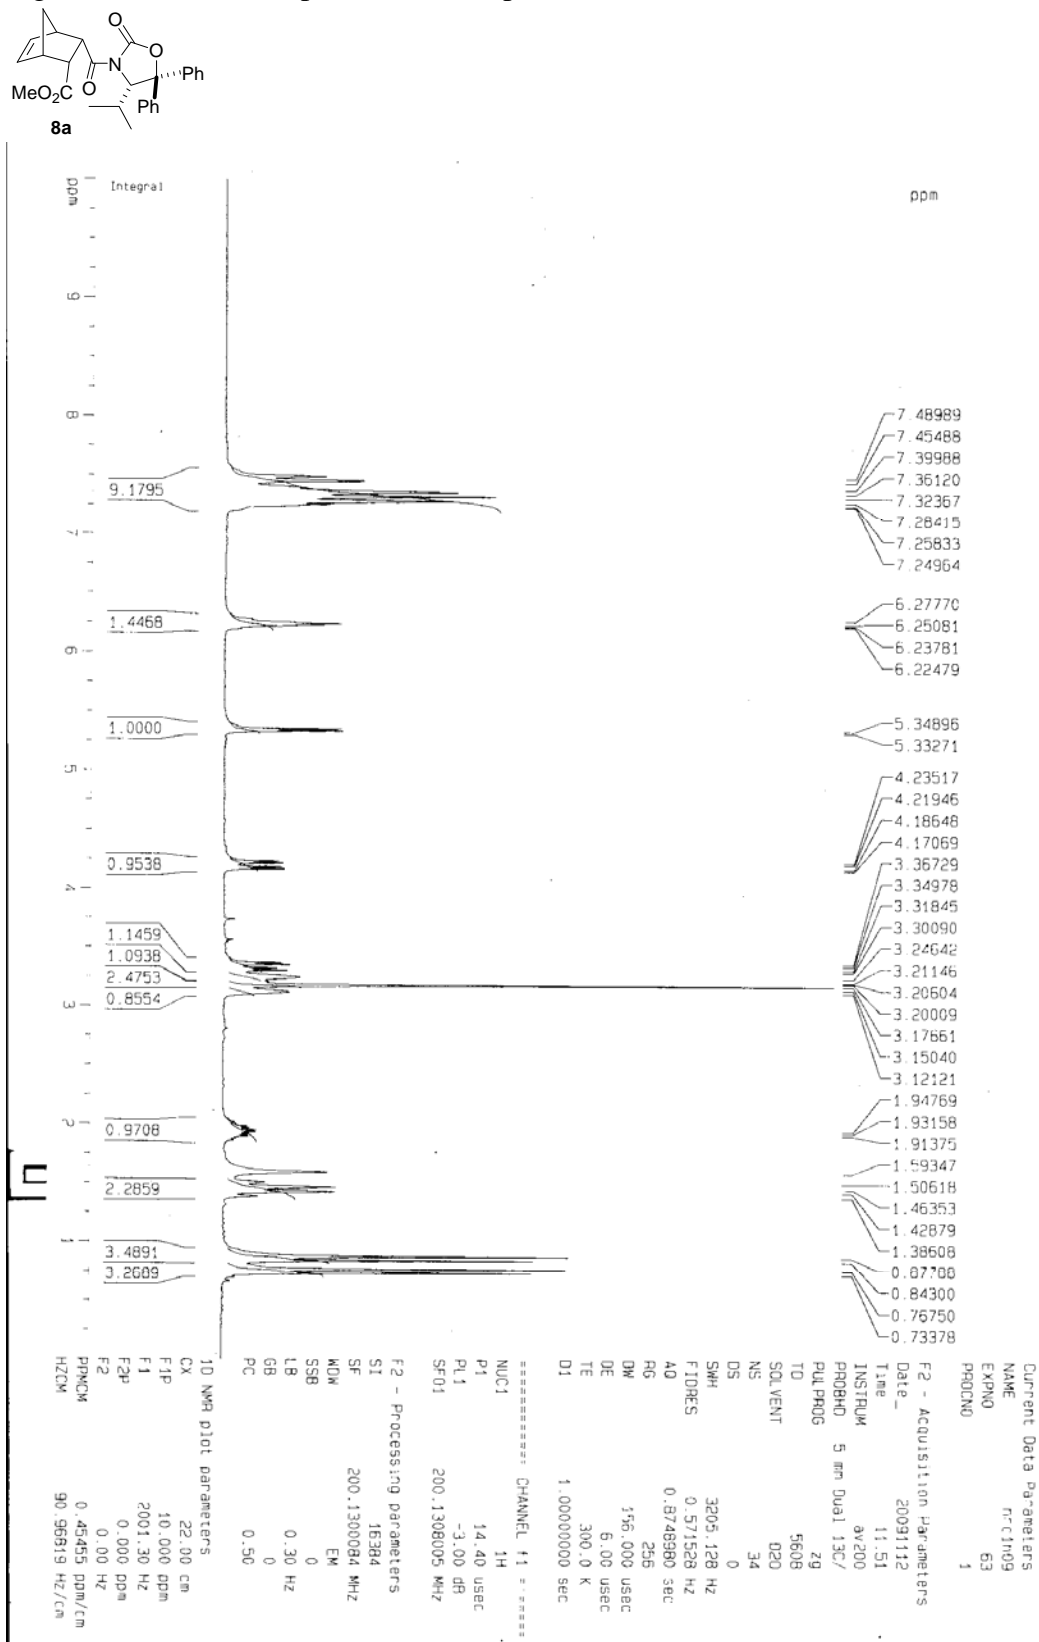

Figure-S20. <sup>13</sup>C NMR spectrum of compound **8a**

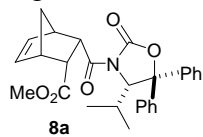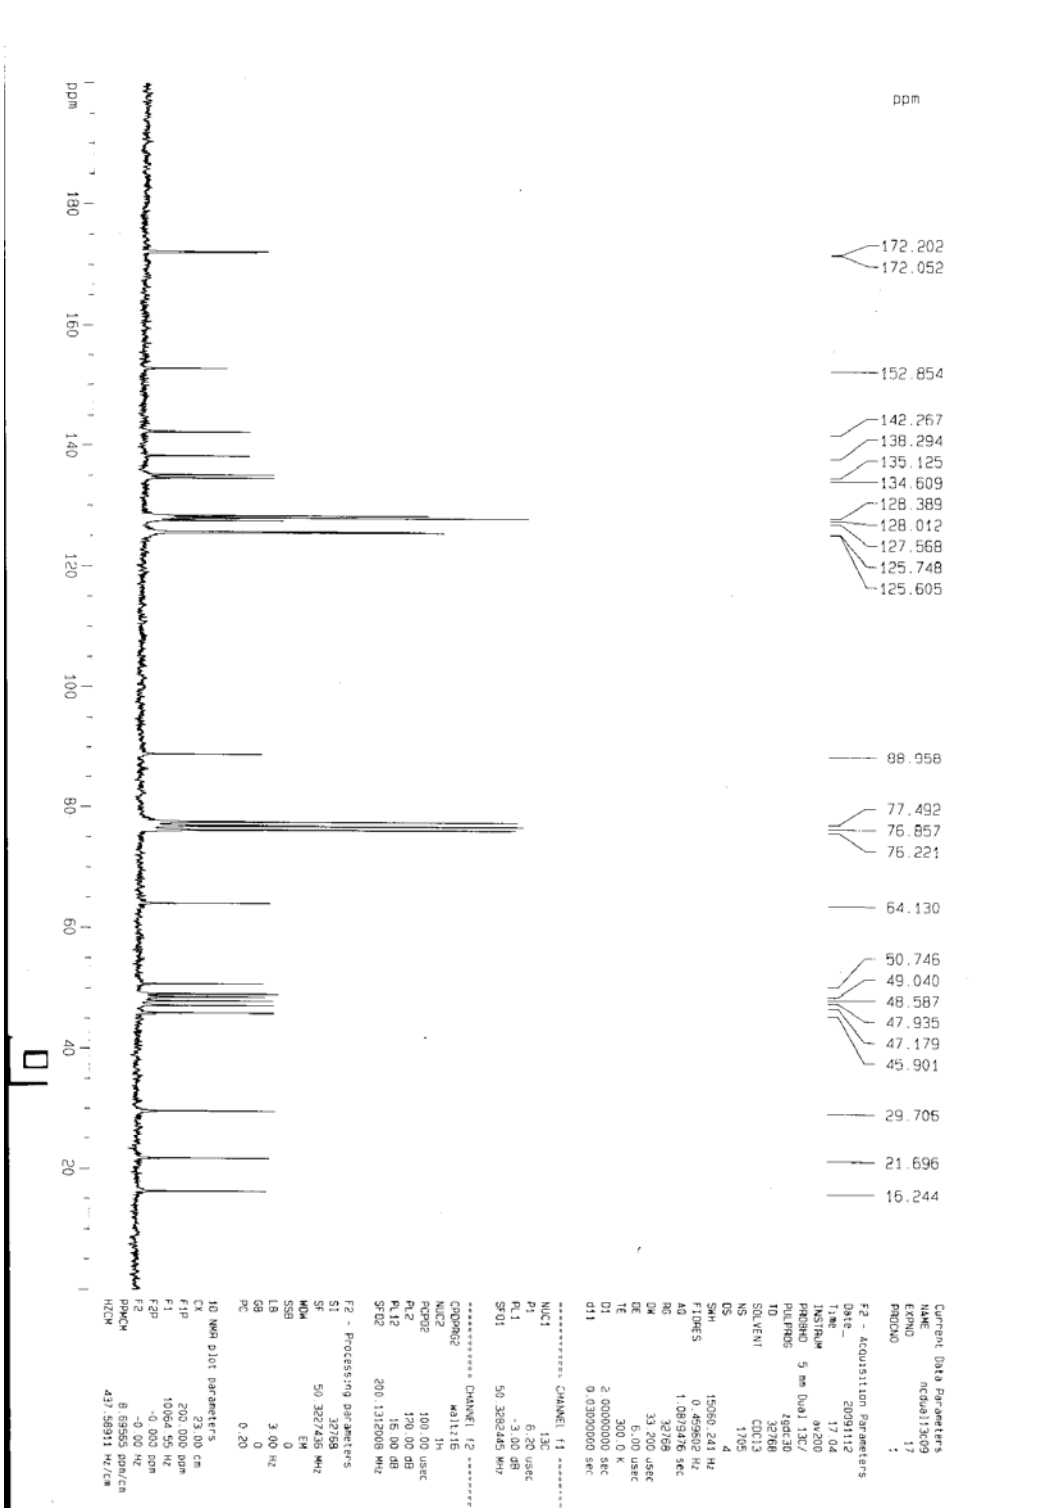

Figure-S21. <sup>1</sup>H NMR spectrum of compound 10a

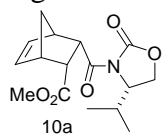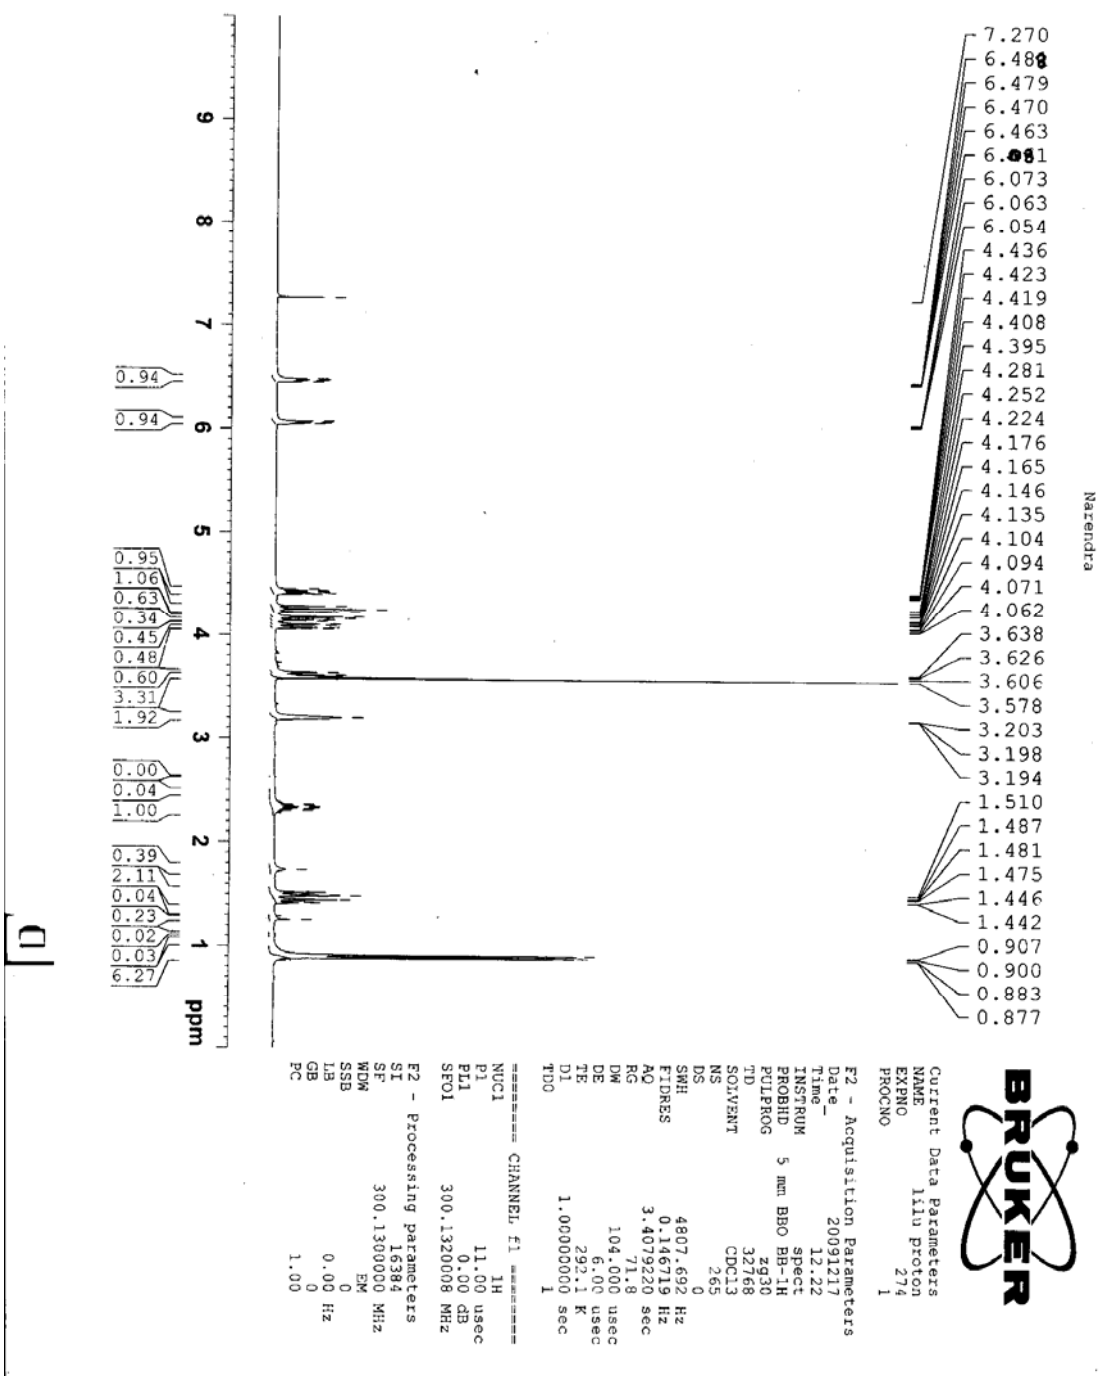

Figure-S22. <sup>13</sup>C NMR spectrum of compound **10a**

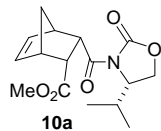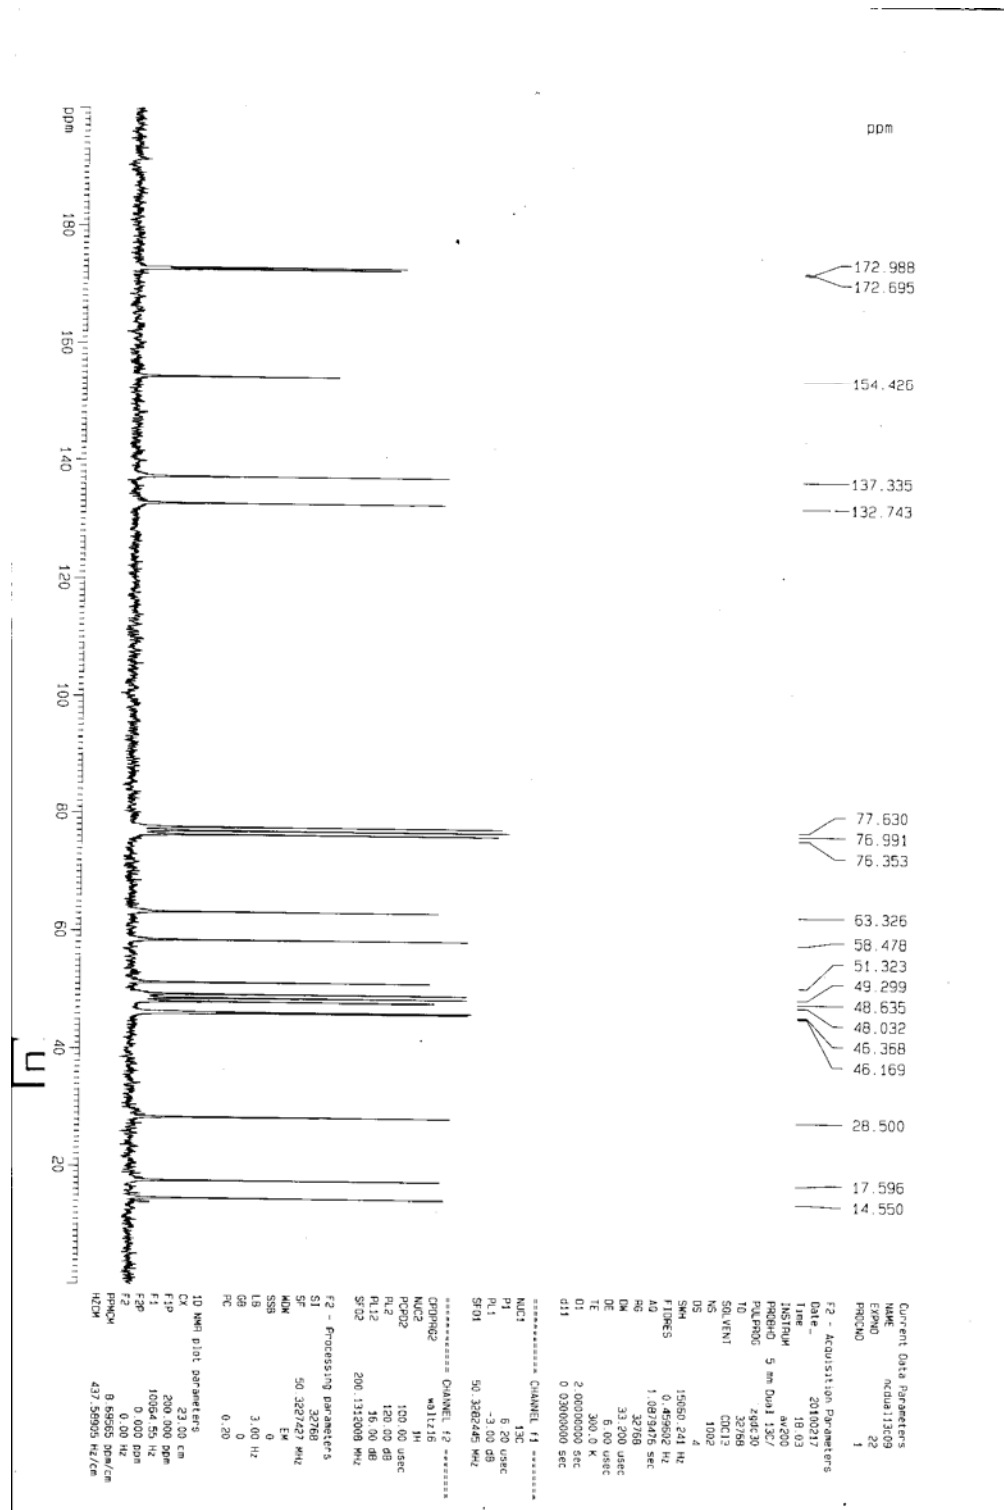



Figure-S23. <sup>1</sup>H NMR spectrum of compound **11a**

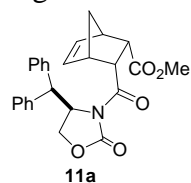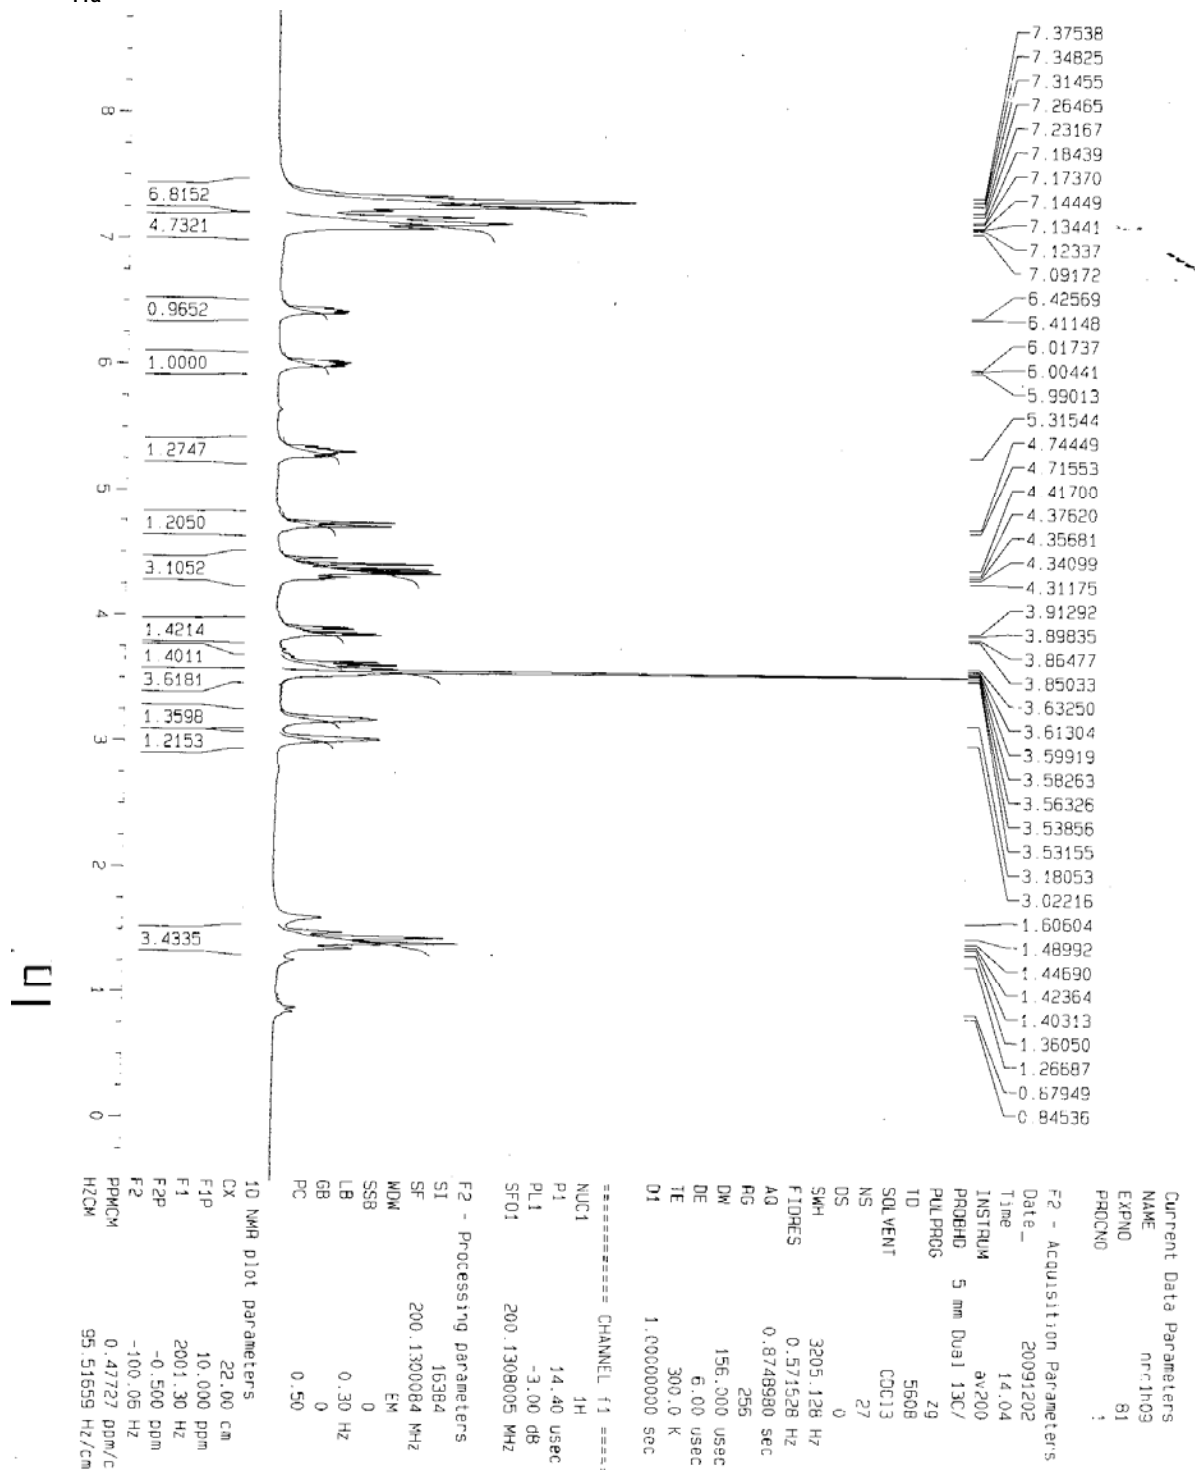

Figure-S24. <sup>13</sup>C NMR spectrum of compound **11a**

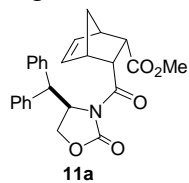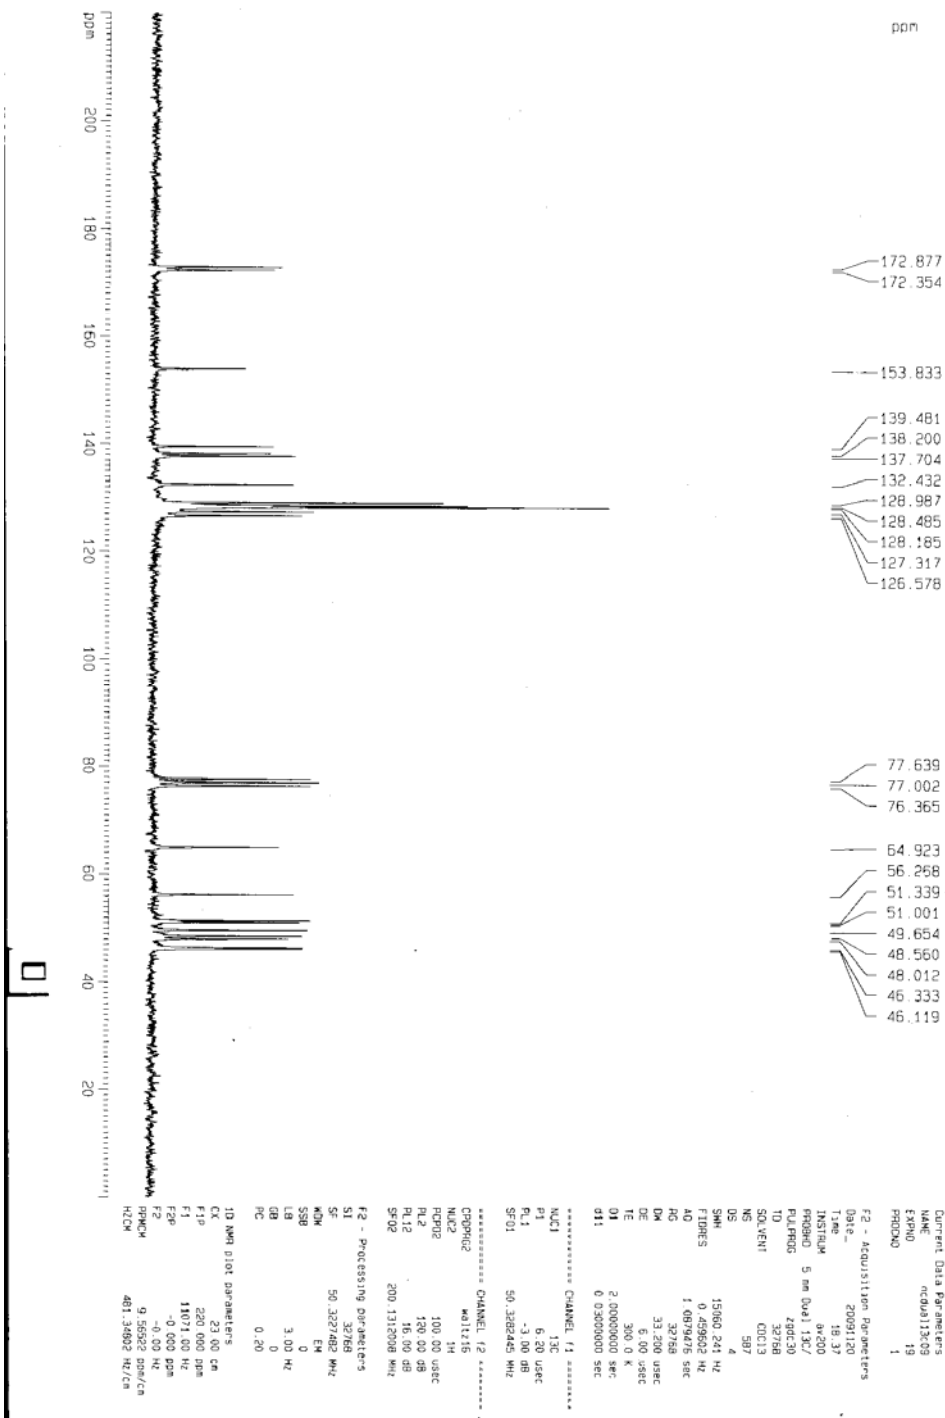

Figure-S25. <sup>1</sup>H NMR spectrum of compound **11b**

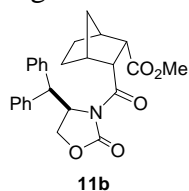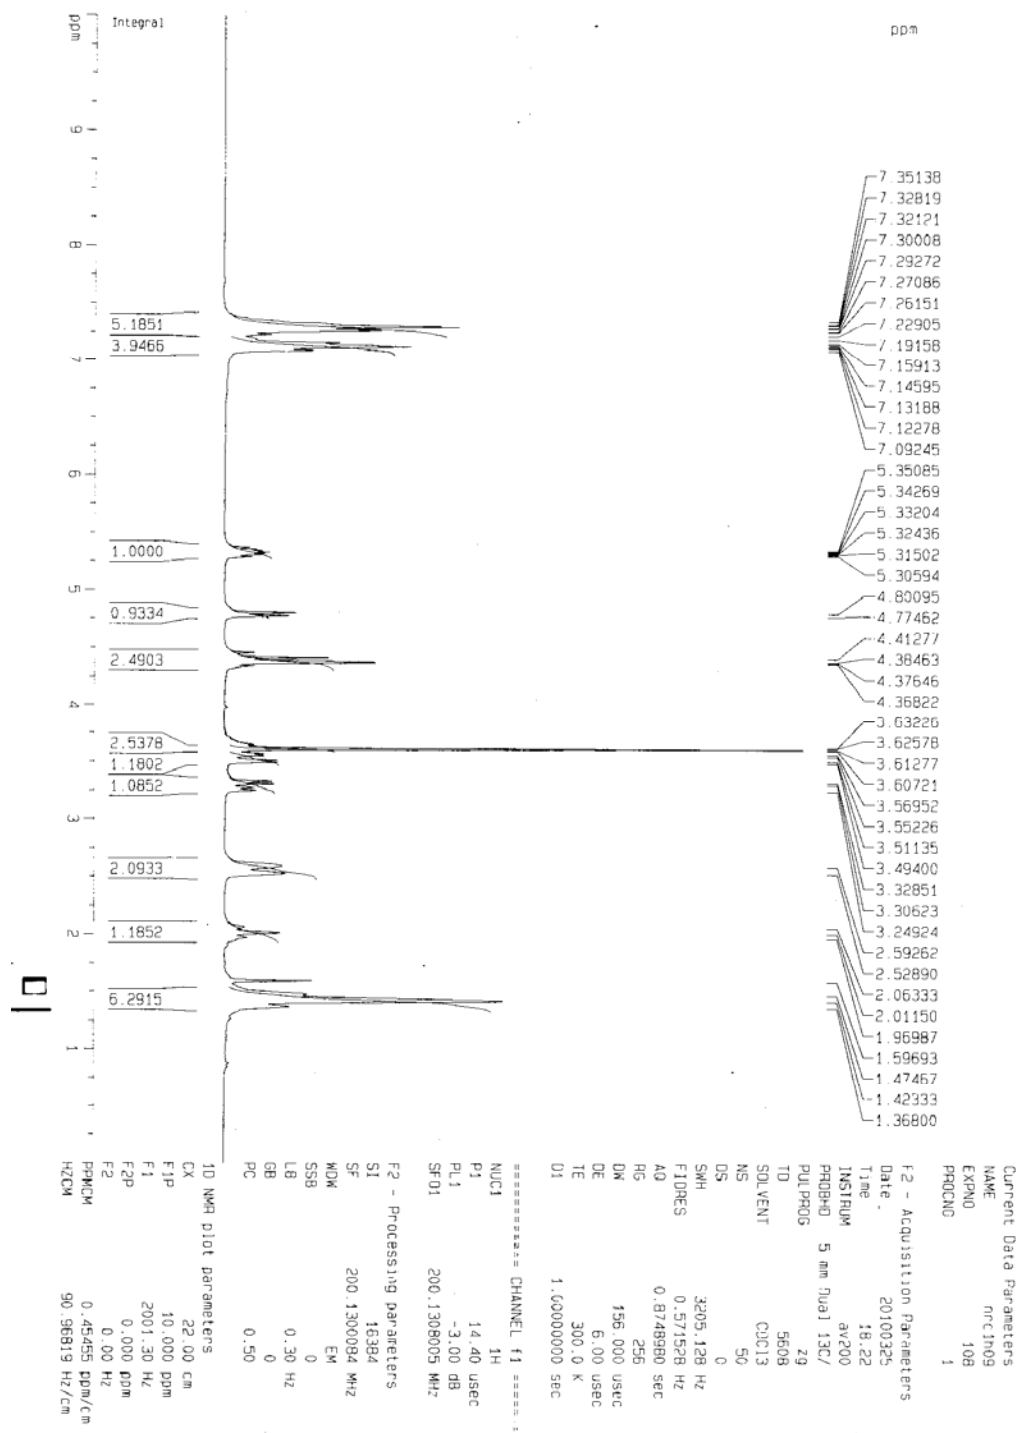

Figure-S26. <sup>13</sup>C NMR spectrum of compound **11b**

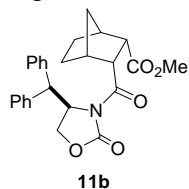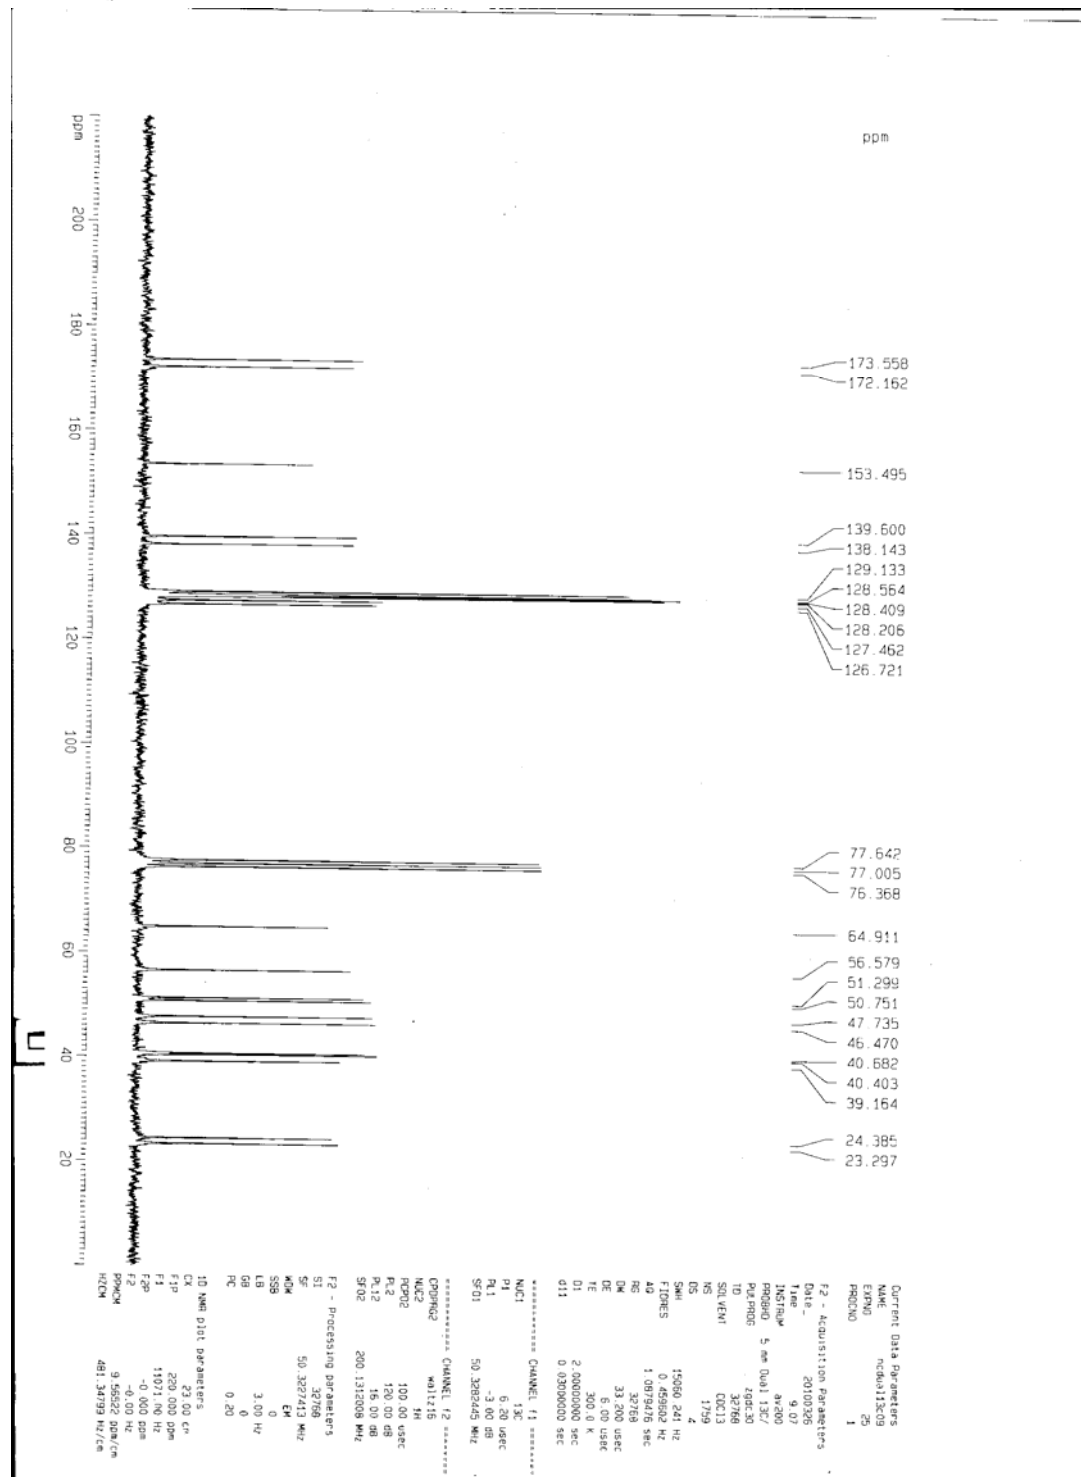

Figure-S27. <sup>1</sup>H NMR spectrum of compound **12b**

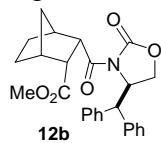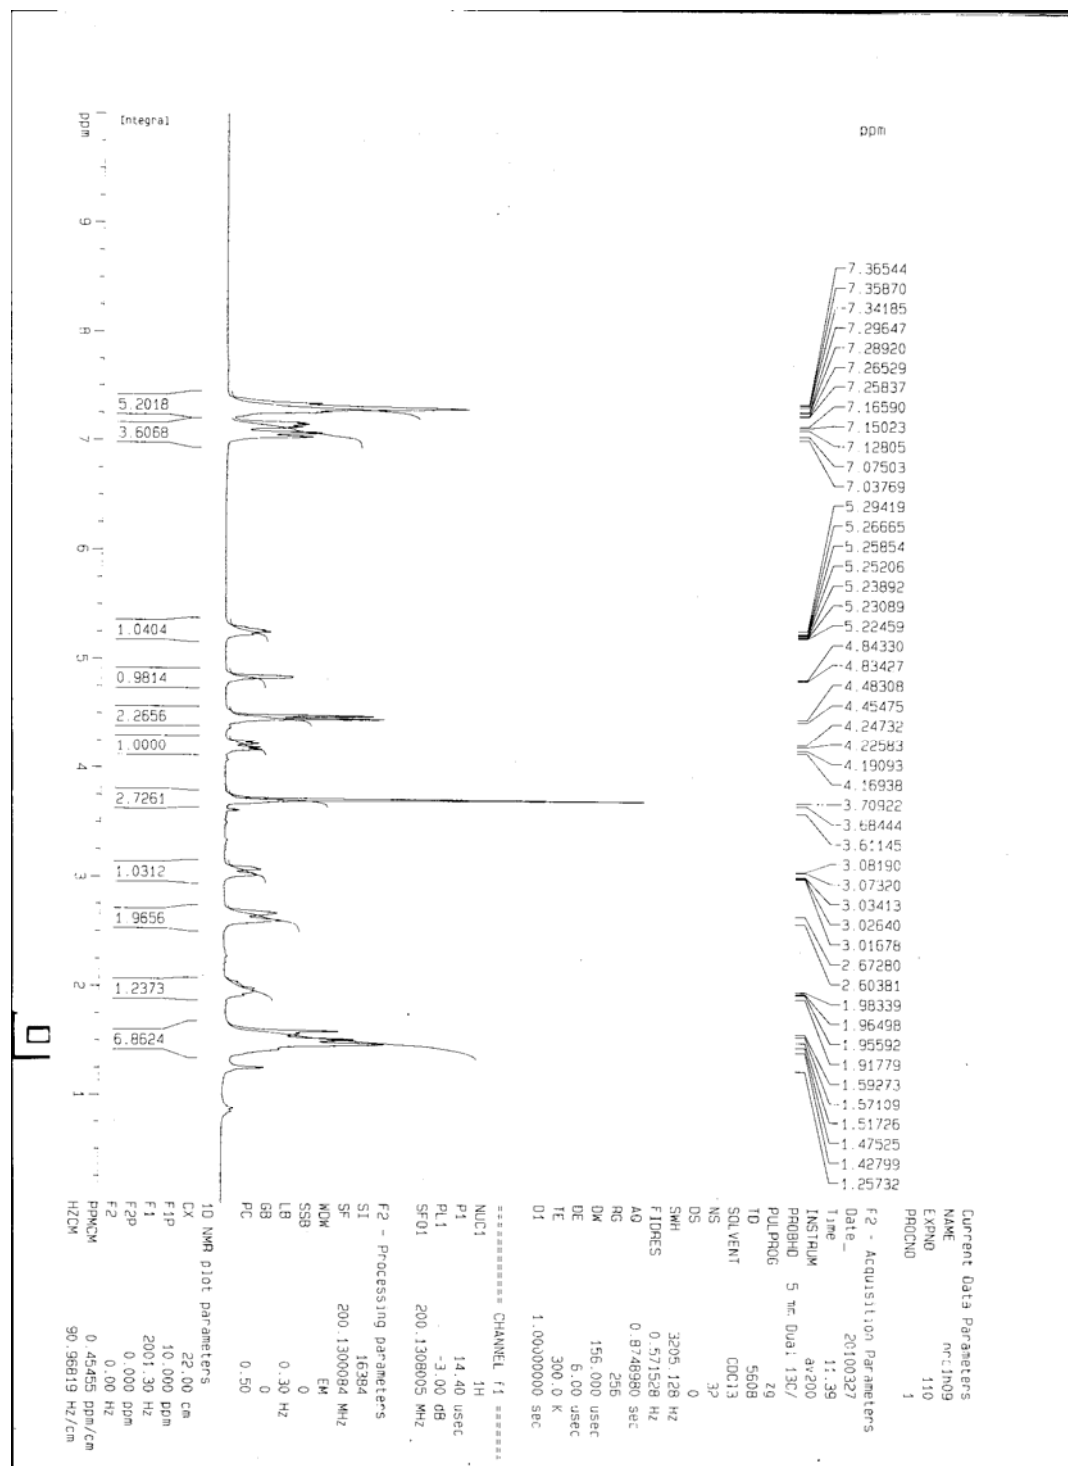

Figure-S28. <sup>13</sup>C NMR spectrum of compound **12b**

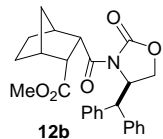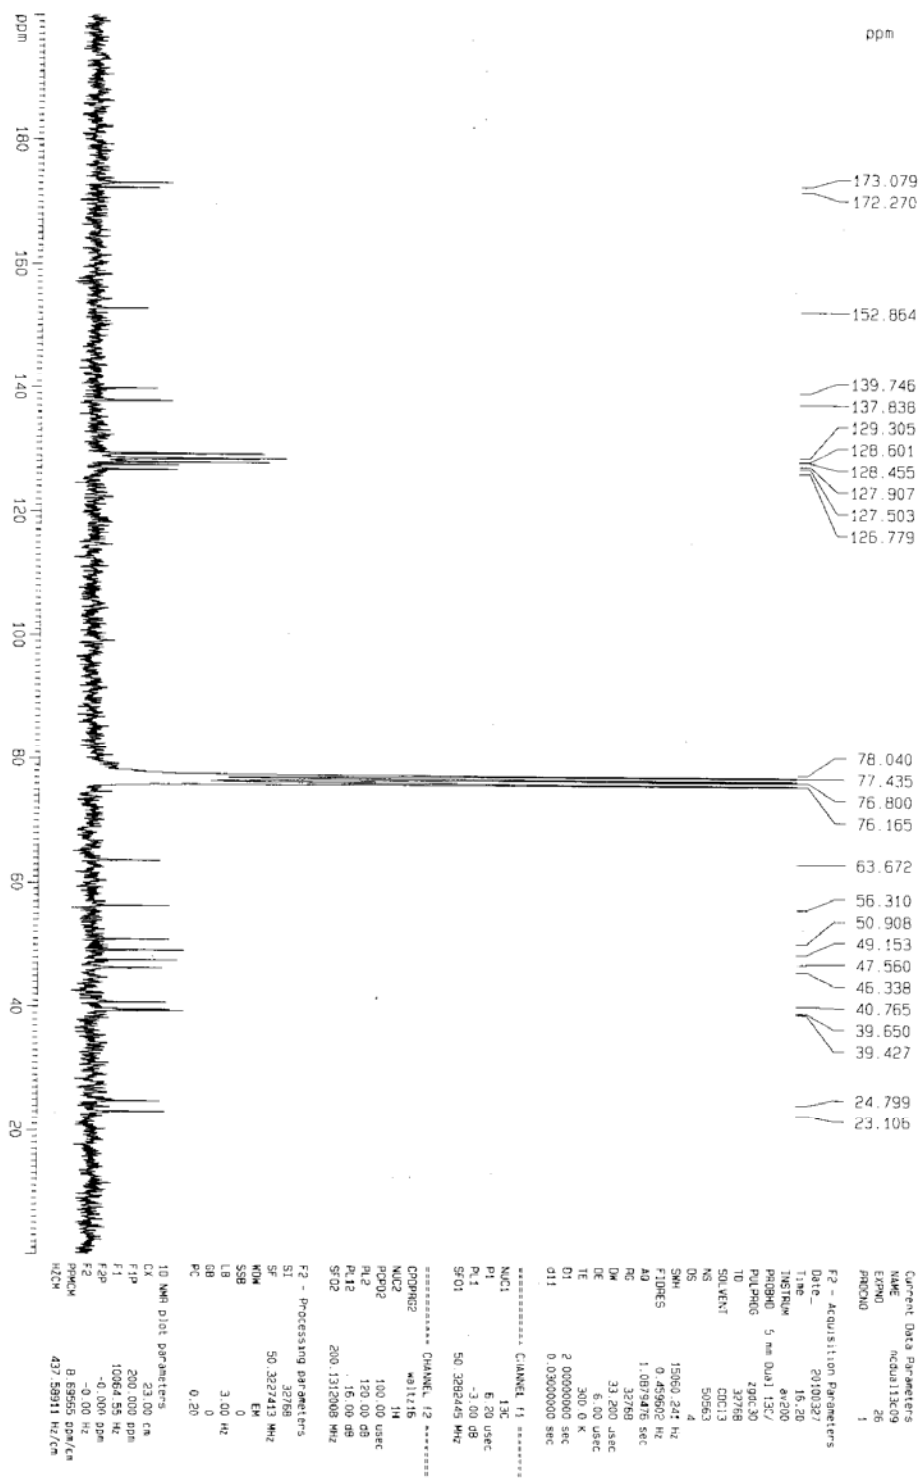

Figure-S29. <sup>1</sup>H NMR spectrum of compound **11c**

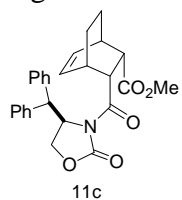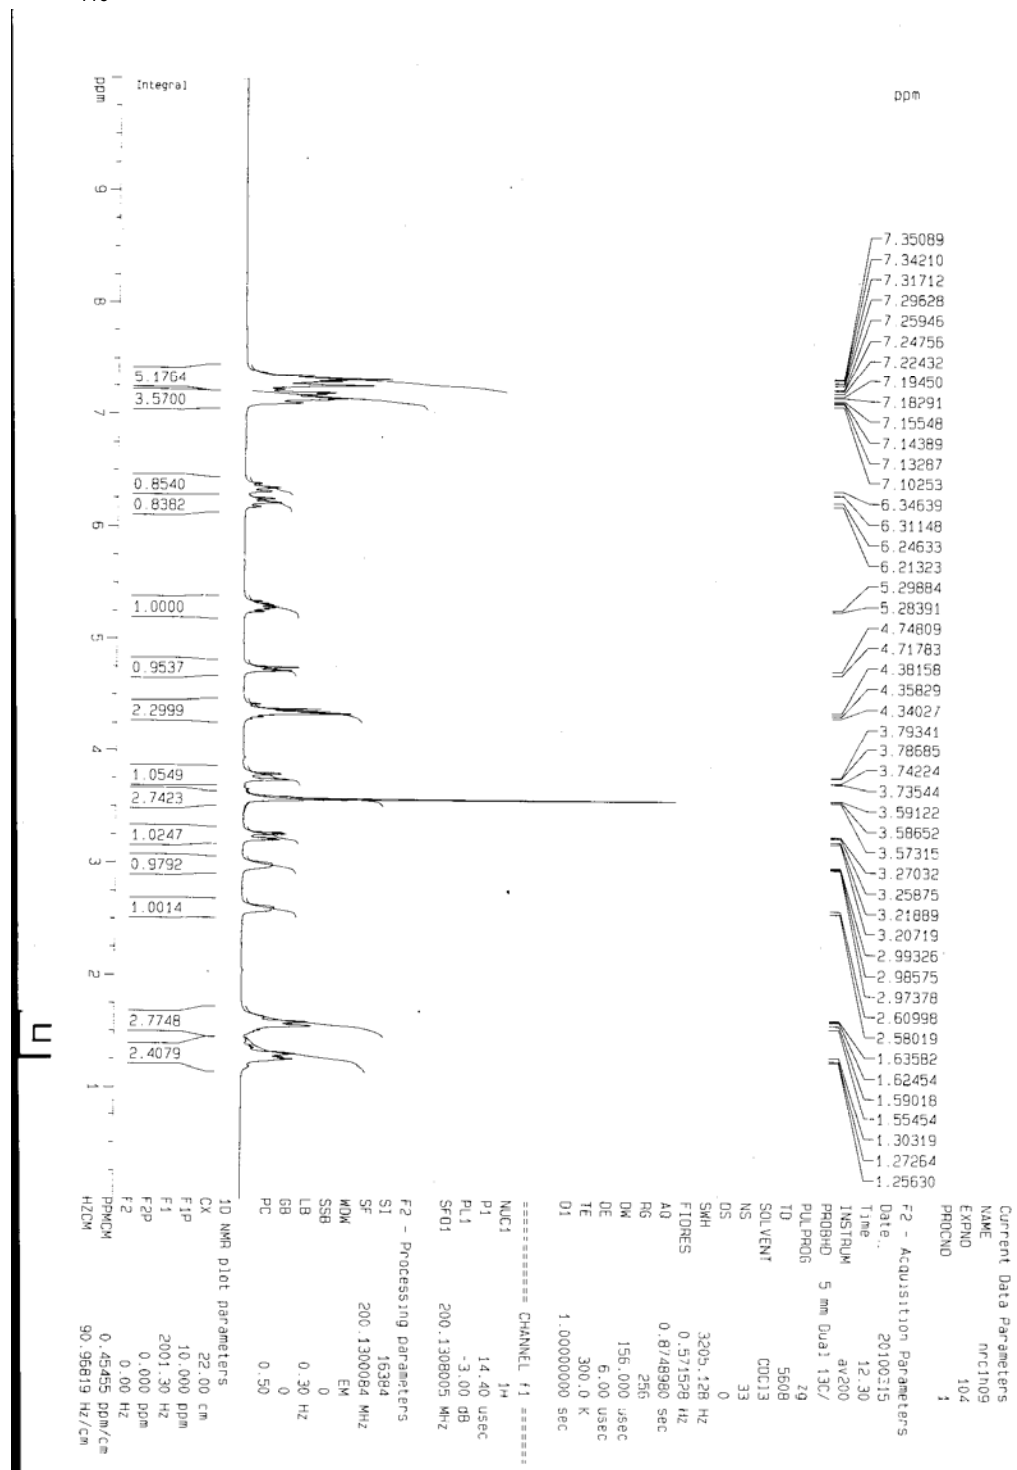

Figure-S30. <sup>13</sup>C NMR spectrum of compound **11c**

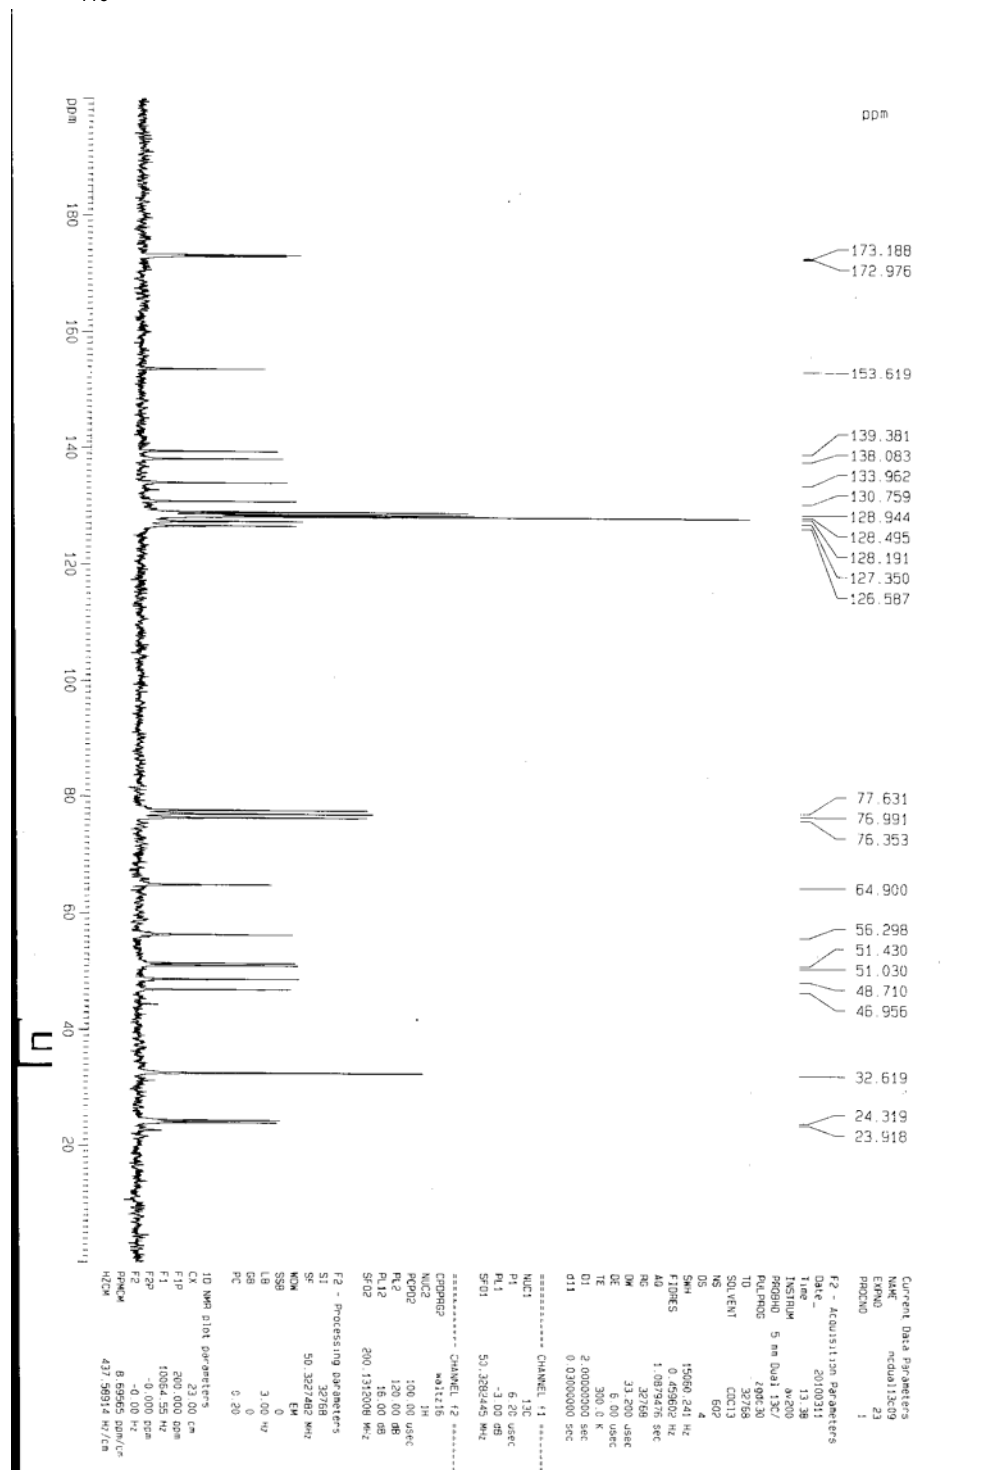



Figure-S31. <sup>1</sup>H NMR spectrum of compound **12c**

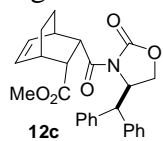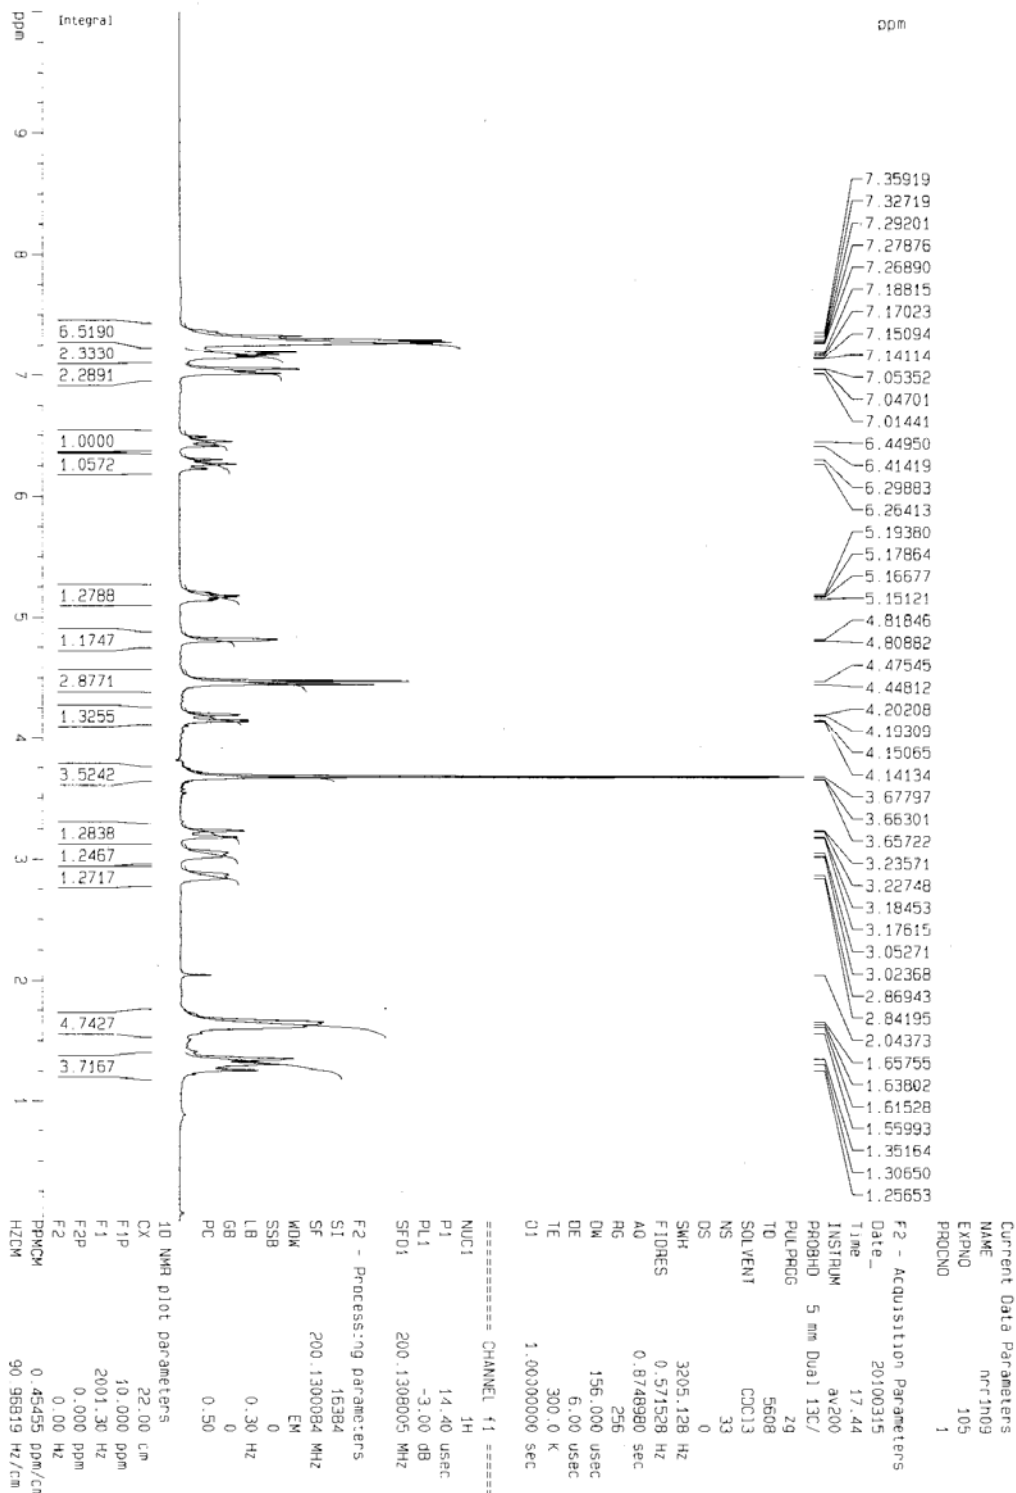

Figure-S32. <sup>13</sup>C NMR spectrum of compound **12c**

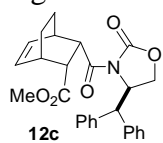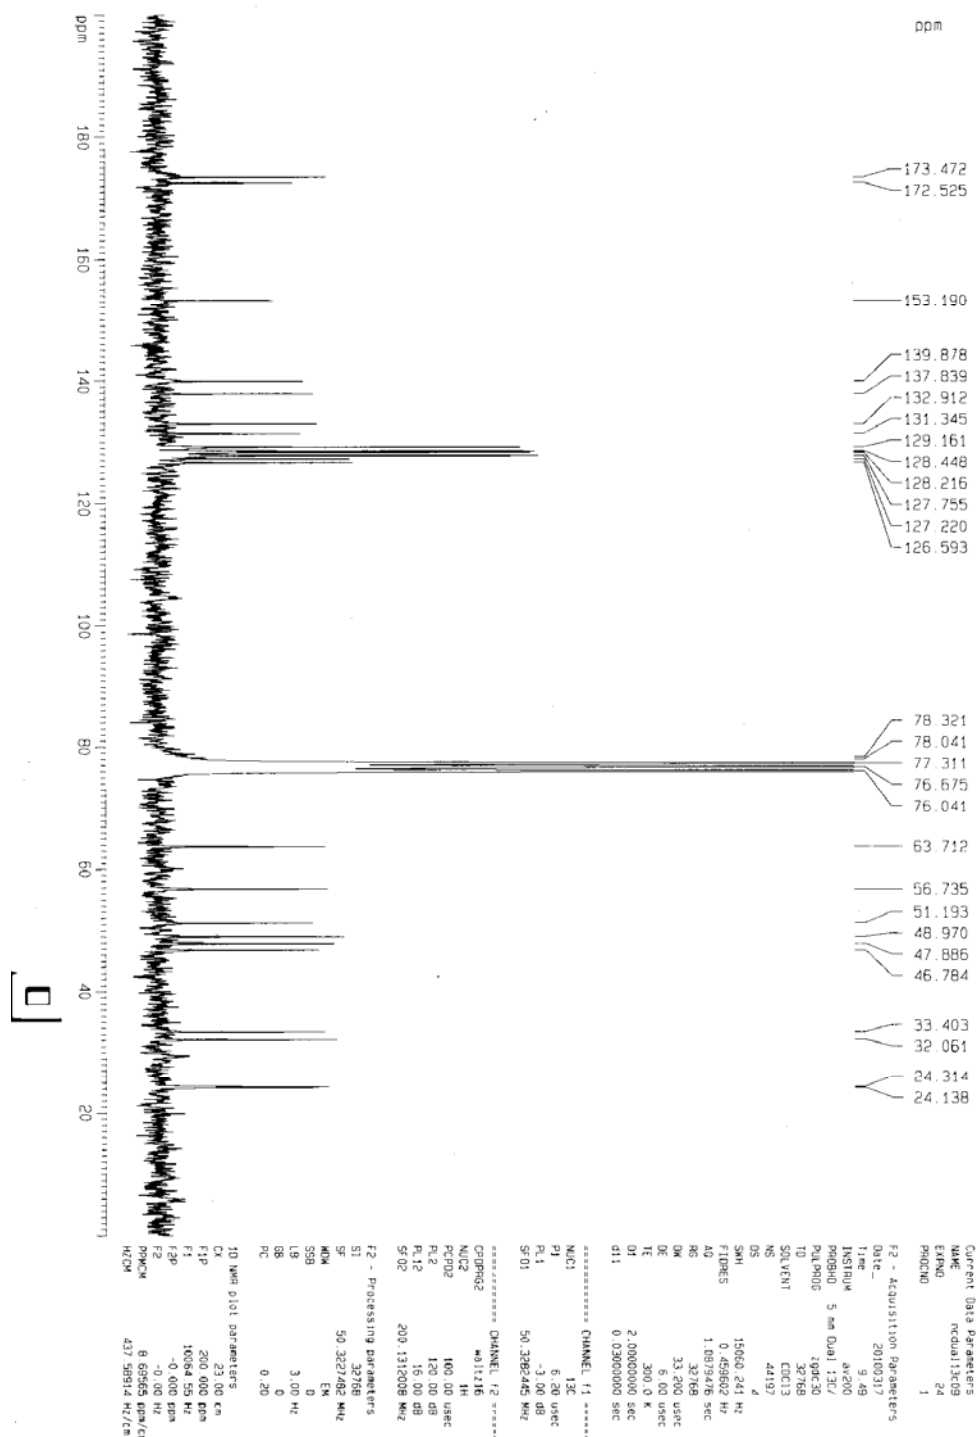

Figure-S33. <sup>1</sup>H NMR spectrum of compound **11d**

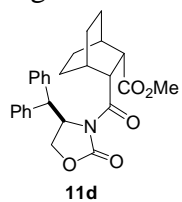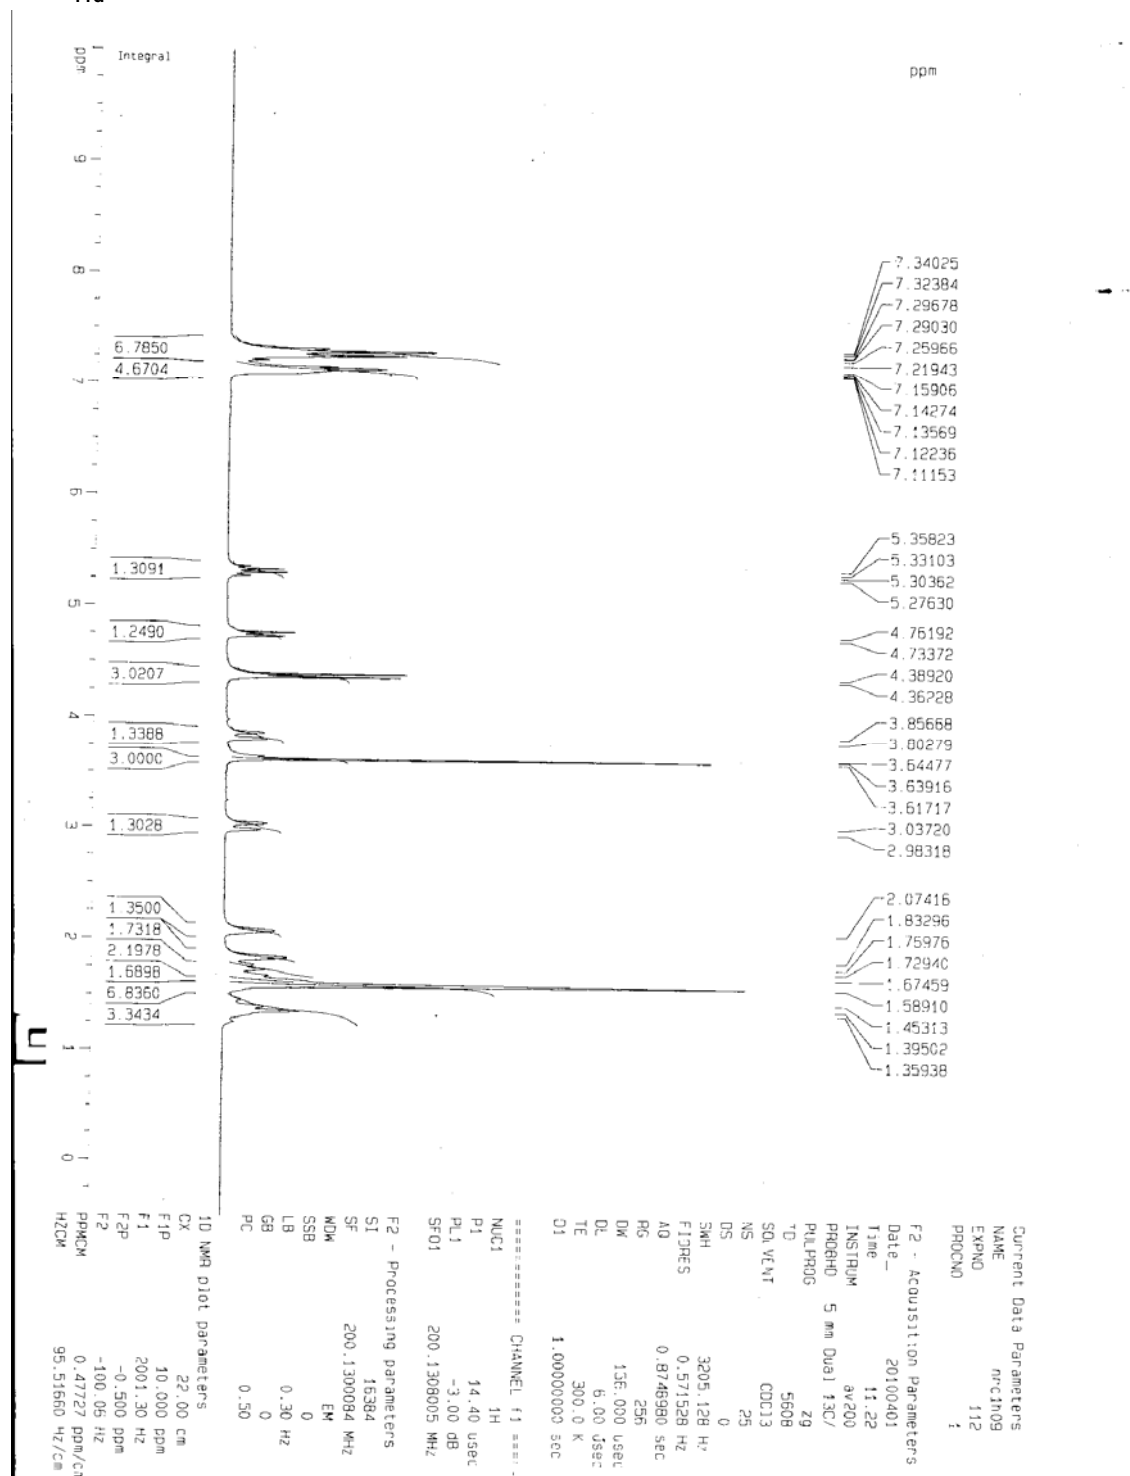

Figure-S34. <sup>13</sup>C NMR spectrum of compound **11d**

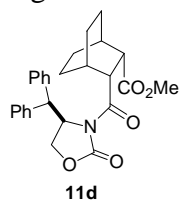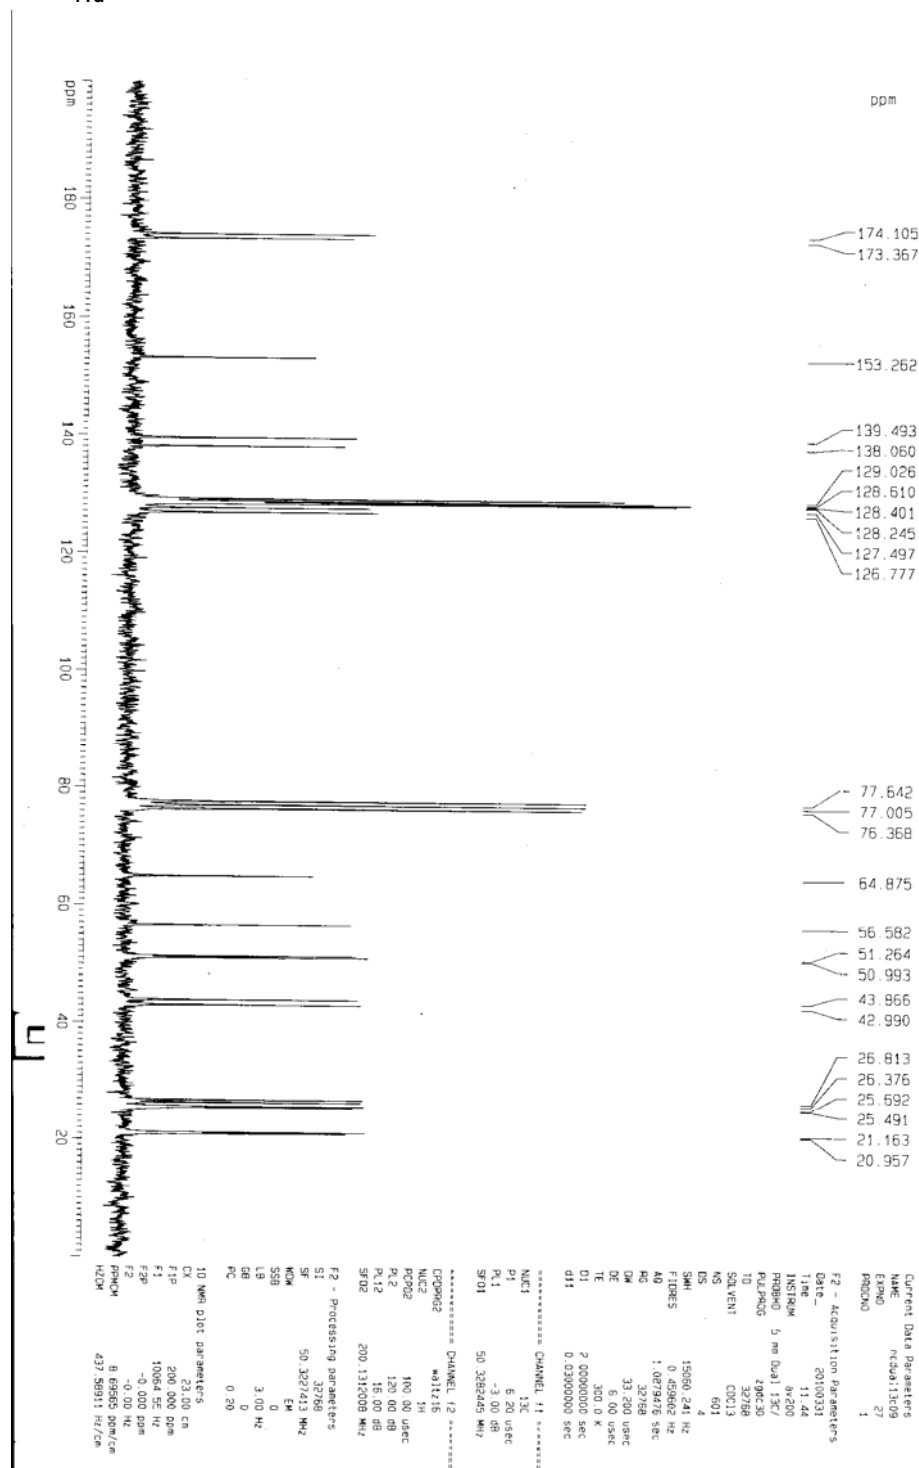

Figure-S35.  $^1\text{H}$  NMR (500 MHz) spectrum of compound **12d**

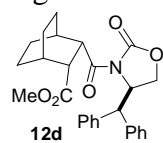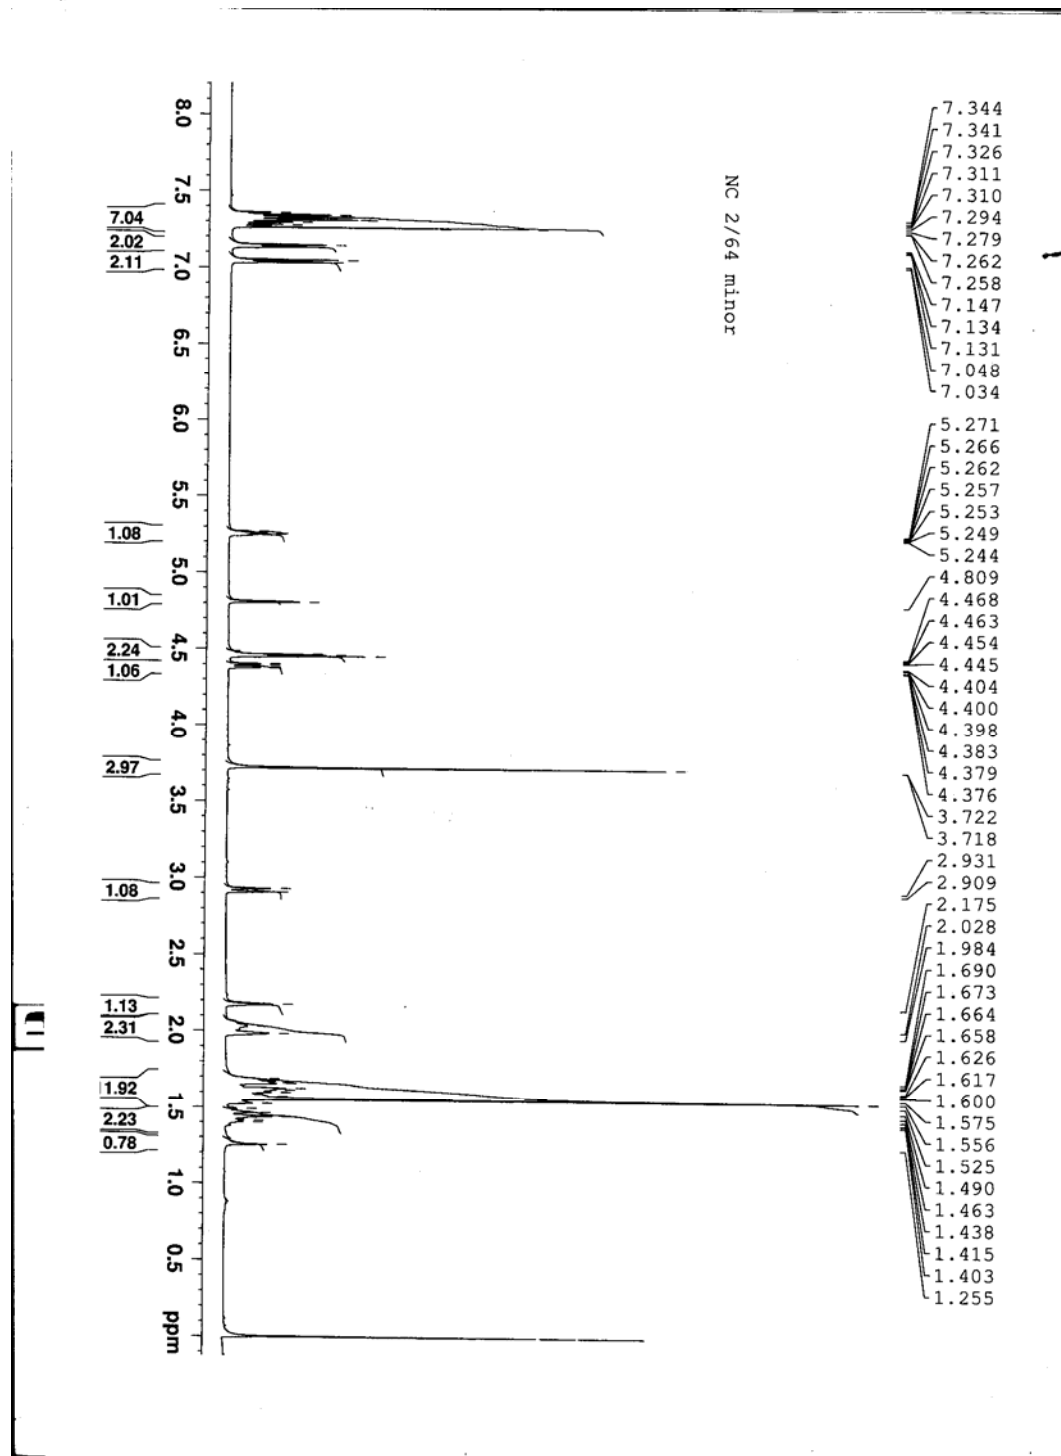

Figure-S36.  $^{13}\text{C}$  NMR (125 MHz) spectrum of compound **12d**

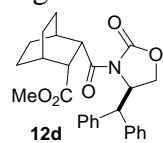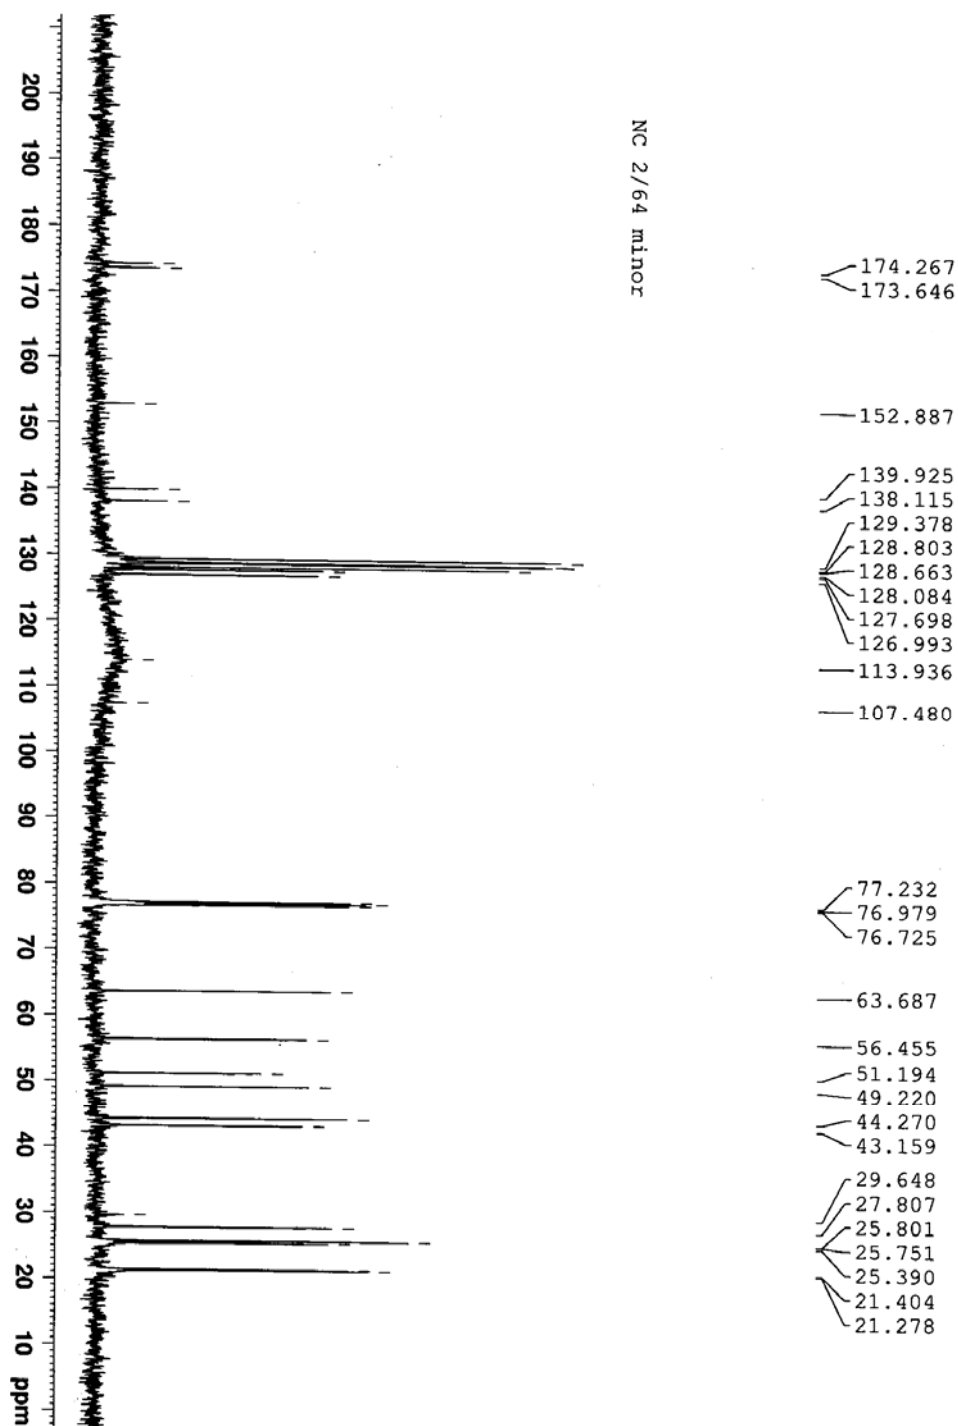

Figure-S37.  $^1\text{H}$  NMR (500 MHz) spectrum of compound **11e**

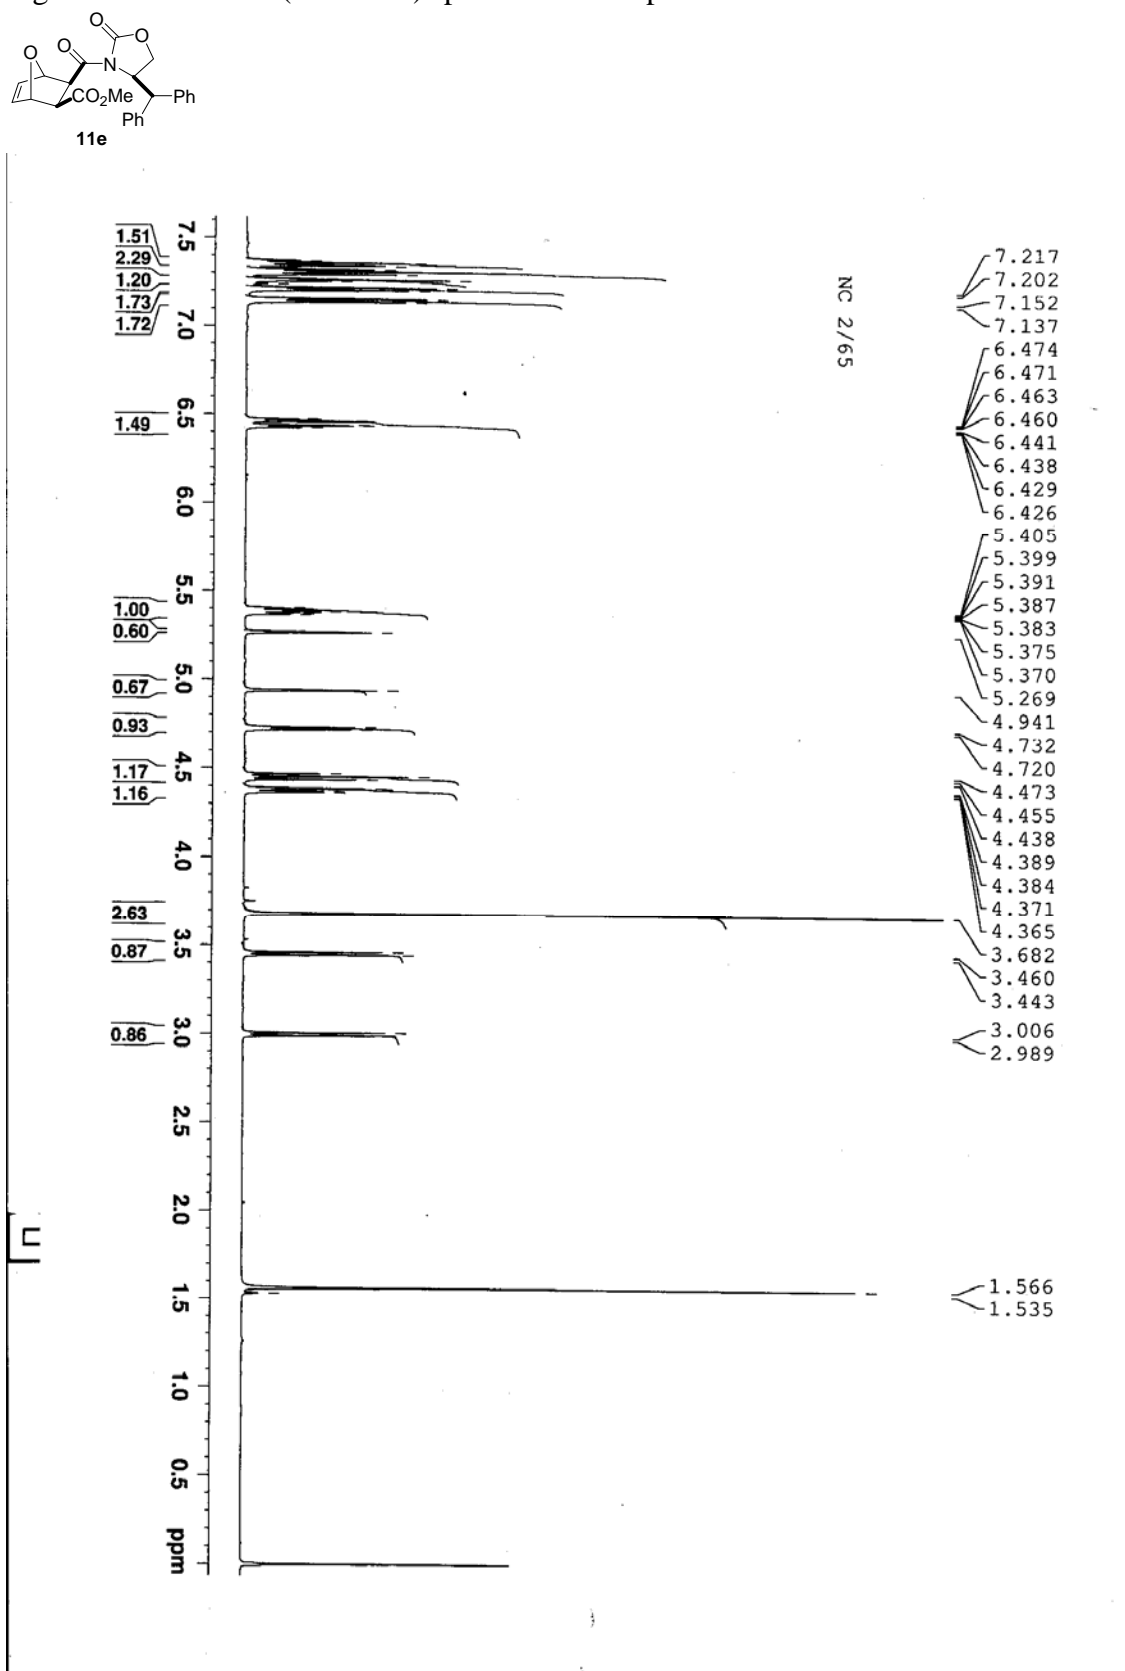

Figure-S38.  $^{13}\text{C}$  NMR spectrum of compound **11e**

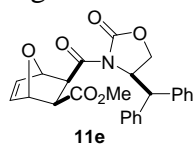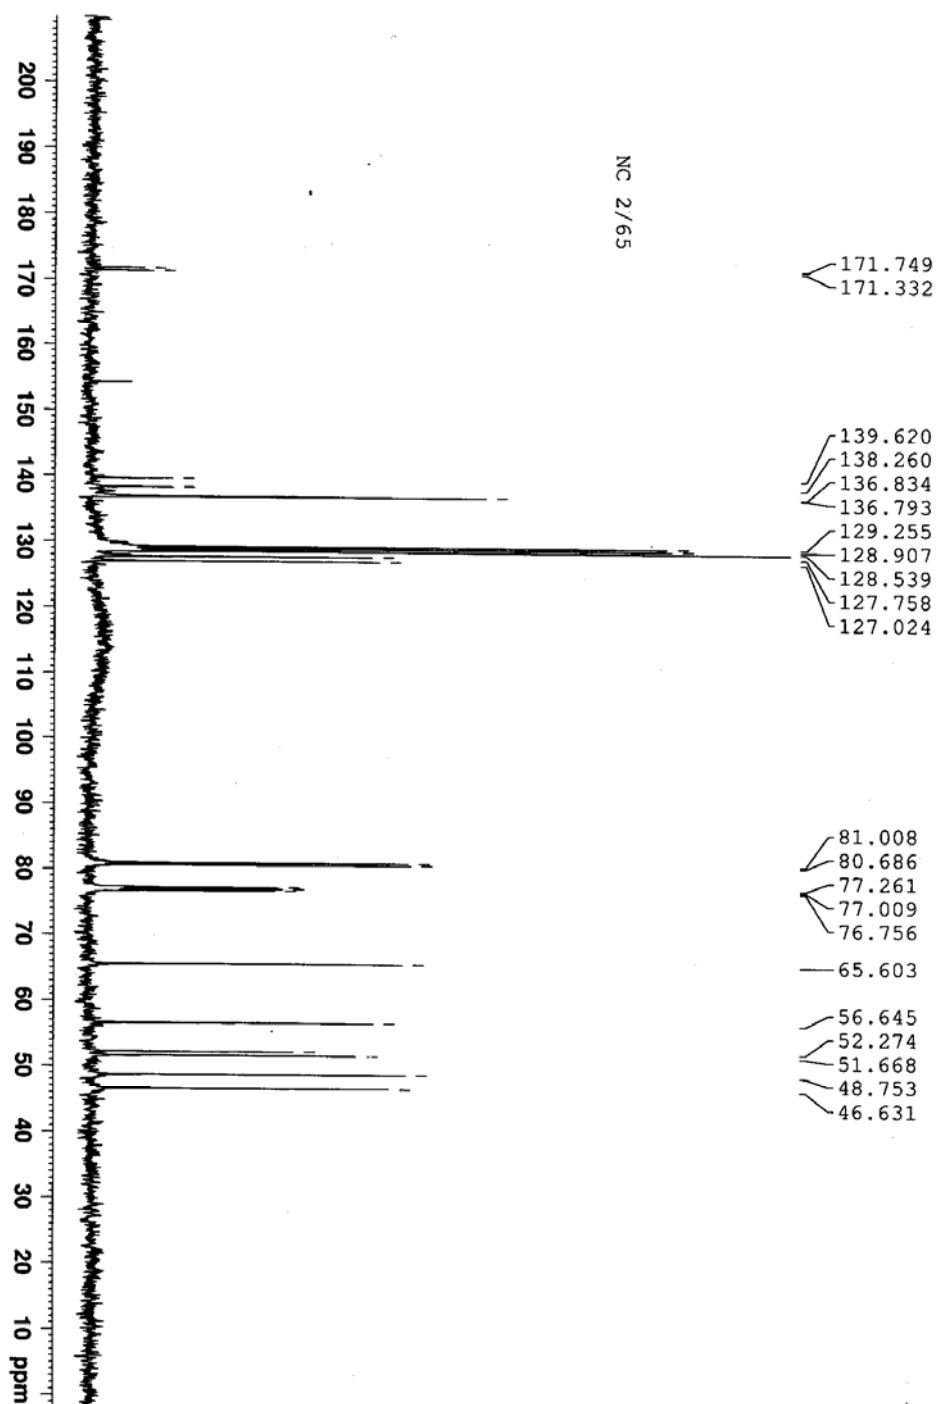



Figure-S39. <sup>1</sup>H NMR spectrum of compound **11f**

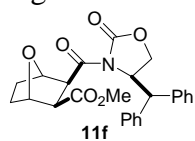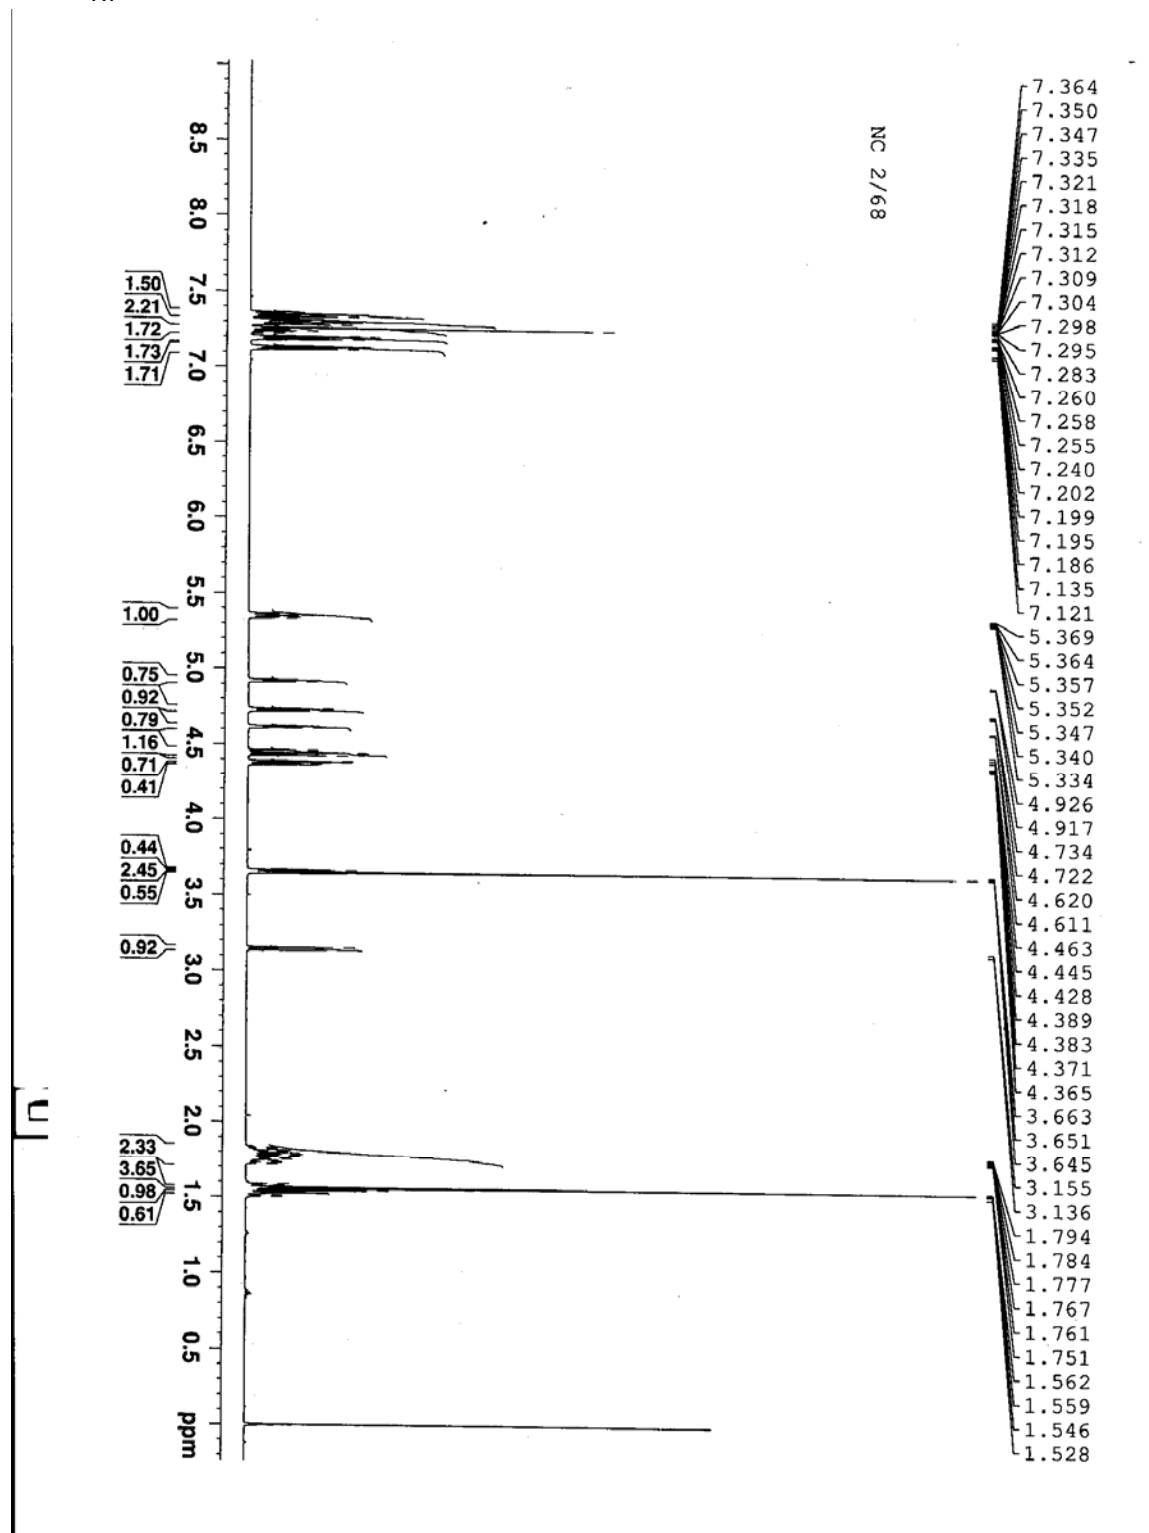

Figure-S40.  $^{13}\text{C}$  NMR spectrum of compound **11f**

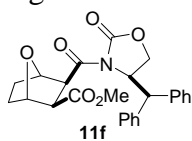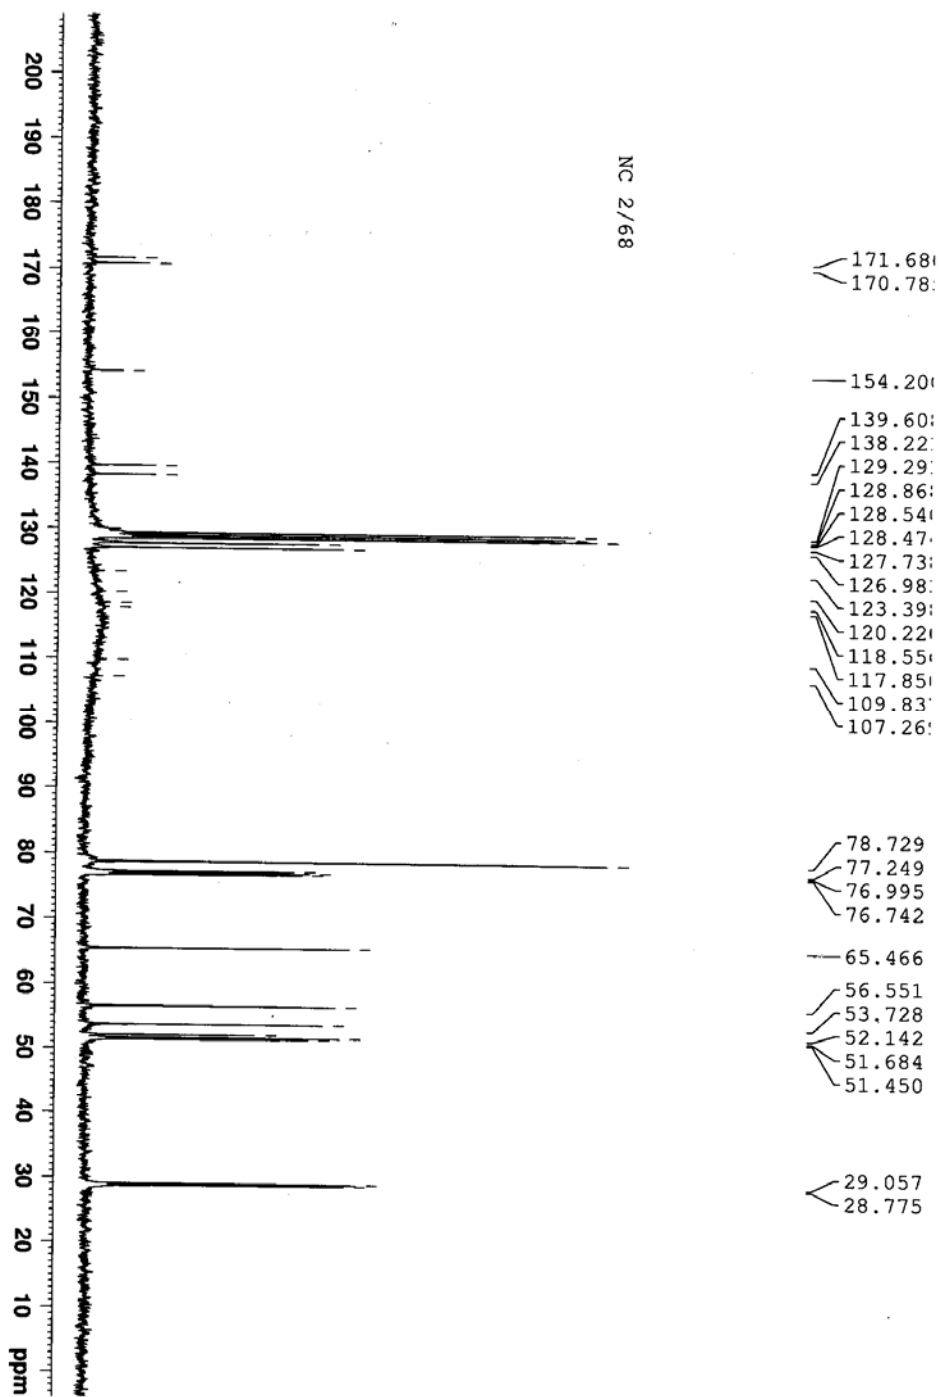

Figure-S41. <sup>1</sup>H NMR spectrum of compound **13**

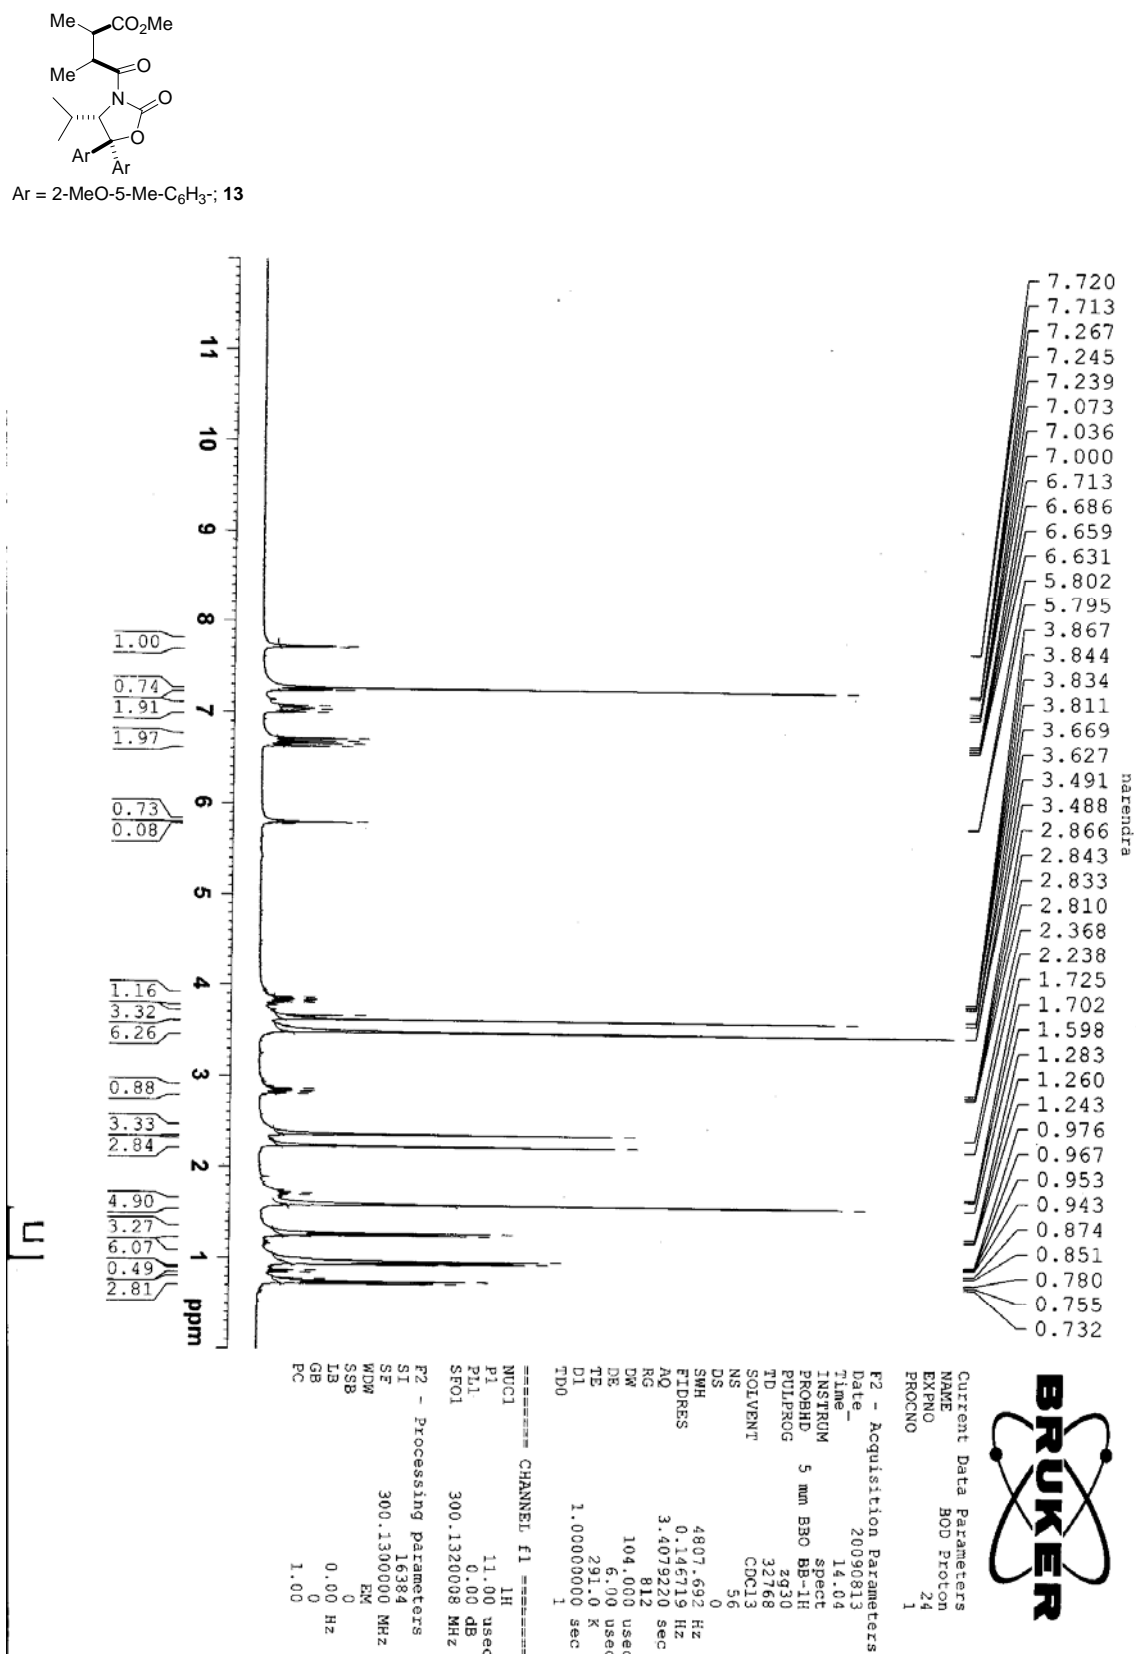

Figure-S42. <sup>13</sup>C NMR spectrum of compound **13**

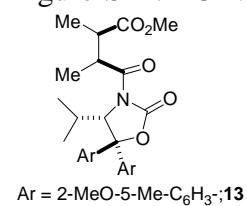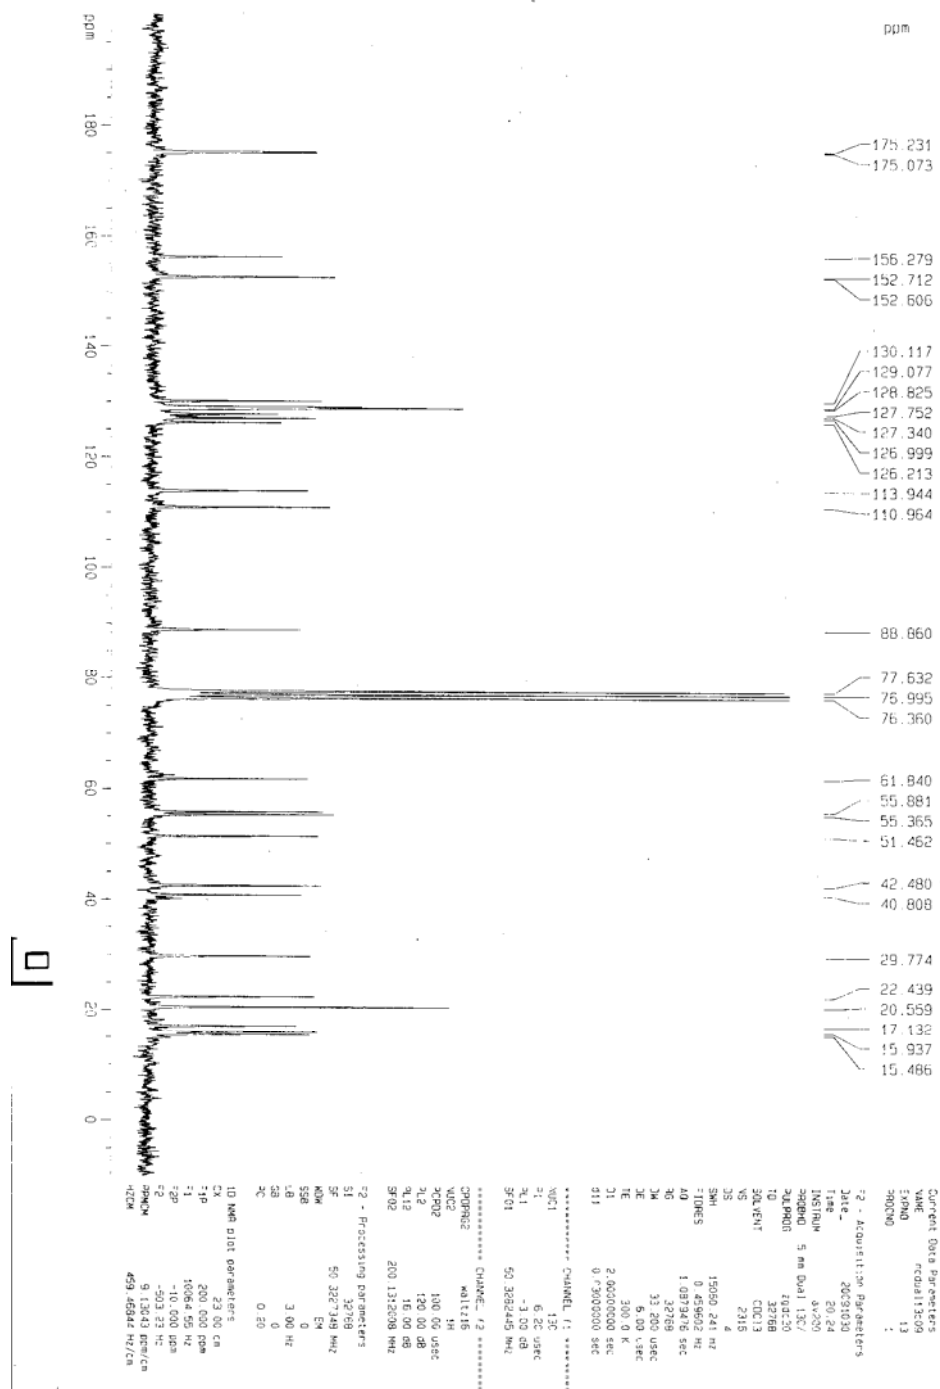

Figure-S43. <sup>1</sup>H NMR spectrum of compound **15a**

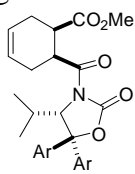

Ar = 2-MeO-5-Me-C<sub>6</sub>H<sub>3</sub>; **15a**

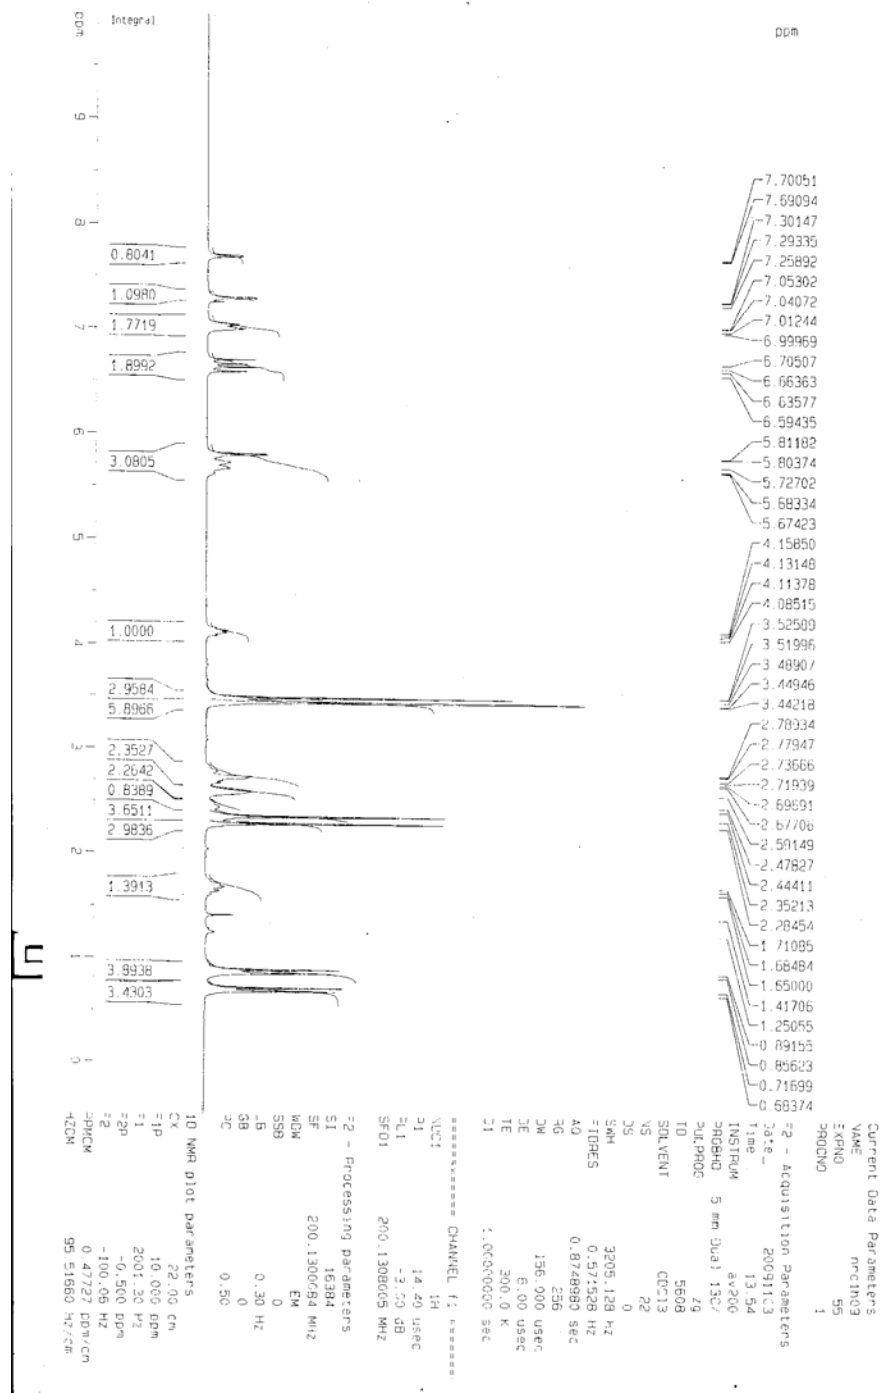

Figure-S44.  $^{13}\text{C}$  NMR spectrum of compound **15a**

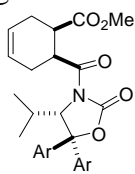

Ar = 2-MeO-5-Me-C<sub>6</sub>H<sub>3</sub>; **15a**

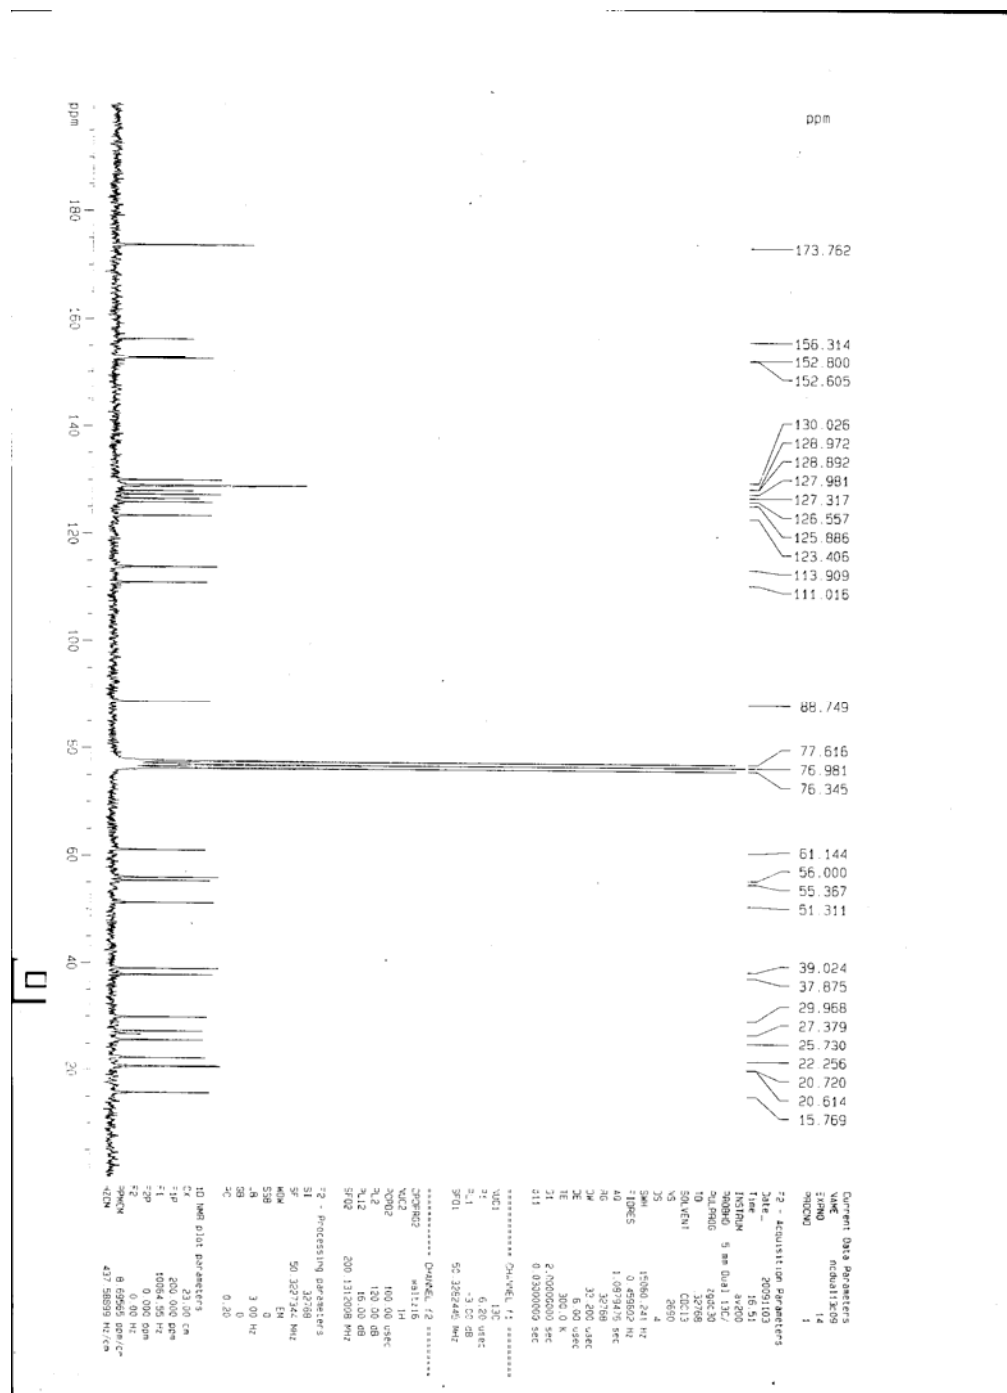

Figure-S45. <sup>1</sup>H NMR spectrum of compound **16a**

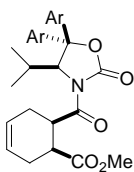

Ar = 2-MeO-5-Me-C<sub>6</sub>H<sub>3</sub>; **16a**

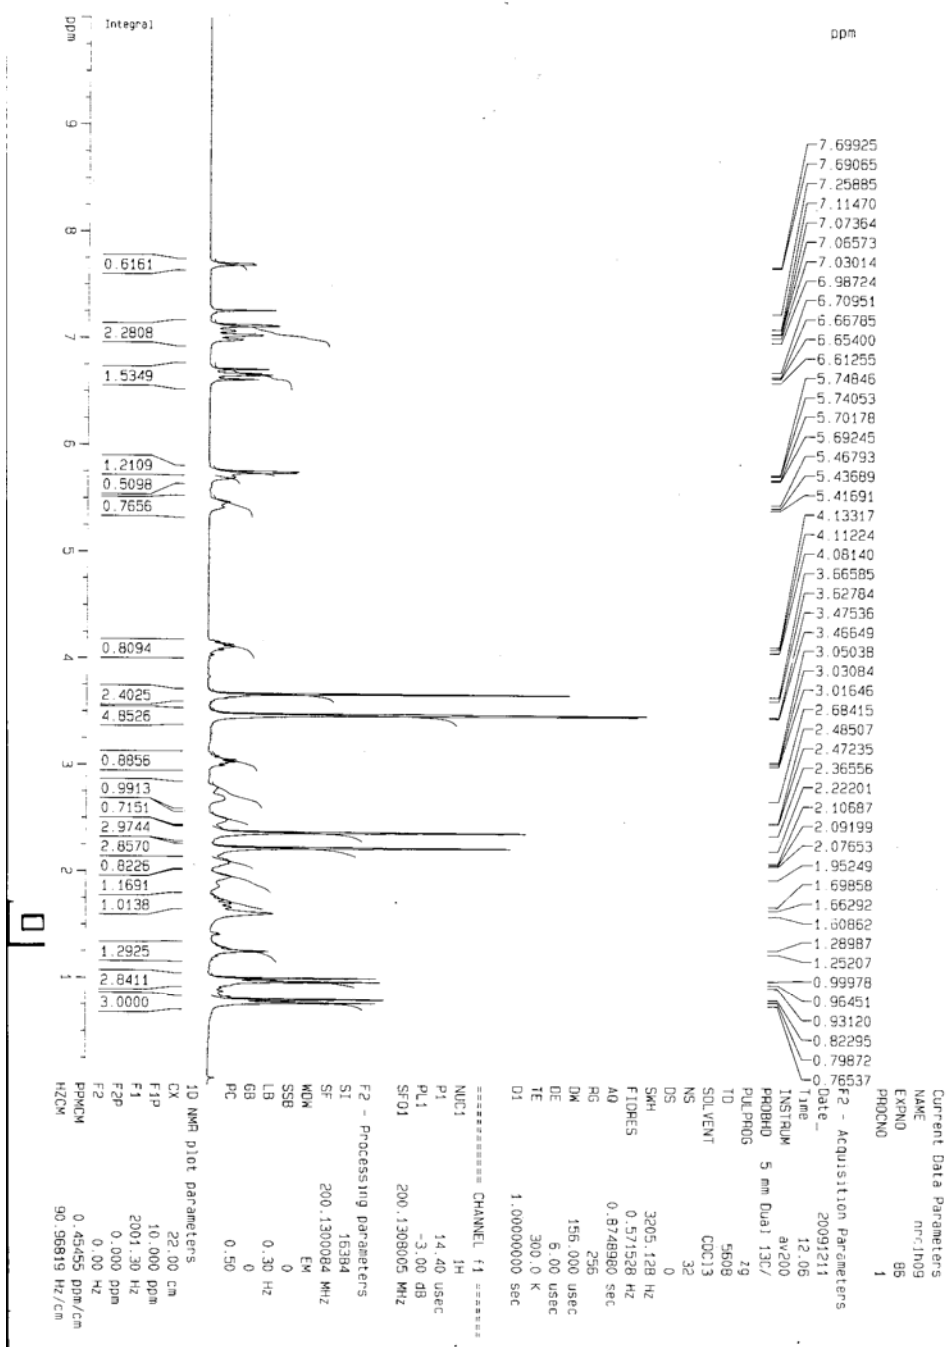

Figure-S46.  $^{13}\text{C}$  NMR spectrum of compound **16a**

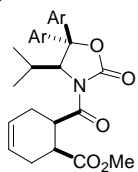

Ar = 2-MeO-5-Me-C<sub>6</sub>H<sub>3</sub>; **16a**

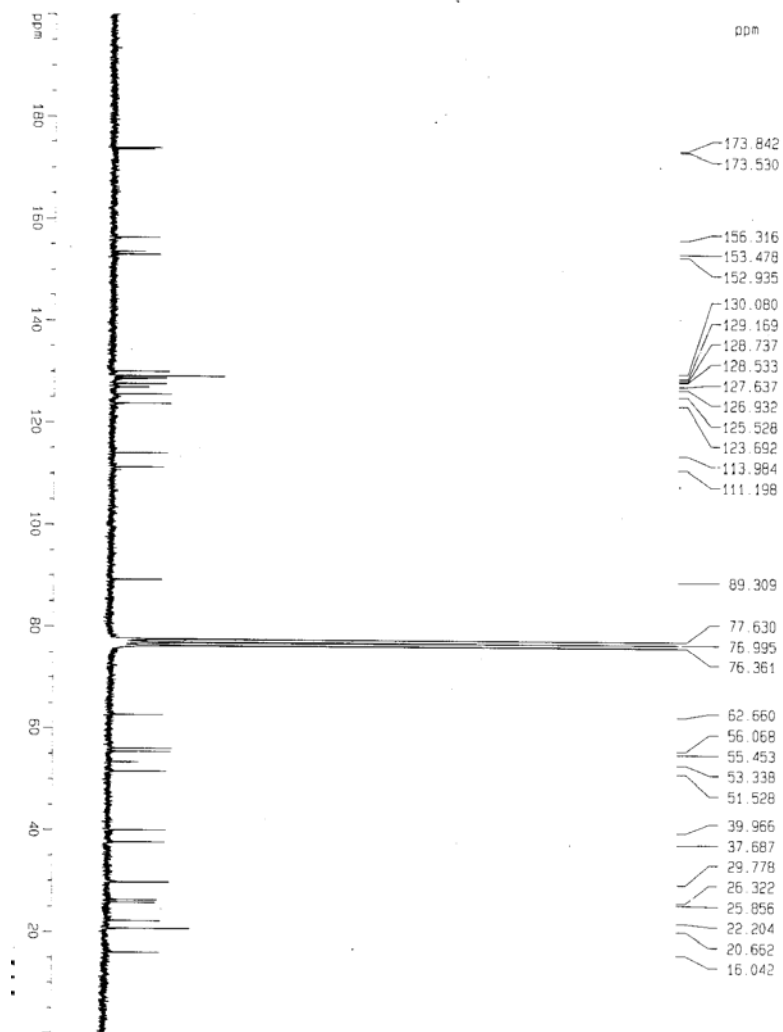

===== CHANNEL 12 =====  
NAME: 16a  
EXPNO: 3  
PROCNO: 1  
F2 - Acquisition Parameters  
Date\_ 20100810  
Time 11:26:43  
INSTRUM spect  
PROBHD 5 mm QNP 1H/2  
PULPROG zgpg30  
TD 65536  
SOLVENT CDCl3  
DS 1282  
SWH 11799.427 Hz  
AQ 0.260019 Hz  
RG 327.500  
FIDRES 0.000000 Hz  
AQRES 0.000000 Hz  
NUC1 13C  
NUC2 13C  
PC 41.700 dB  
TE 300.2 K  
D1 2.0000000 sec  
d11 0.0500000 sec  
DELTA 1.8000000 sec  
DELTA2 0.0000000 sec  
DELTA3 0.0000000 sec  
===== CHANNEL 11 =====  
NAME: 16a  
EXPNO: 3  
PROCNO: 1  
F2 - Processing parameters  
SI 32768  
SF 125.760 MHz  
WDW EM  
SSB 0  
LB 3.00 Hz  
GB 0  
PC 1.40  
NOISE 3.00 dB  
===== CHANNEL 12 =====  
NAME: 16a  
EXPNO: 3  
PROCNO: 1  
F2 - Processing parameters  
SI 65536  
SF 125.760 MHz  
WDW EM  
SSB 0  
LB 3.00 Hz  
GB 0  
PC 1.40  
NOISE 3.00 dB  
===== CHANNEL 11 =====  
NAME: 16a  
EXPNO: 3  
PROCNO: 1  
F2 - Processing parameters  
SI 32768  
SF 125.760 MHz  
WDW EM  
SSB 0  
LB 3.00 Hz  
GB 0  
PC 1.40  
NOISE 3.00 dB



Figure-S47. <sup>1</sup>H NMR spectrum of compound **15b**

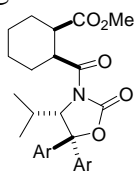

Ar = 2-MeO-5-Me-C<sub>6</sub>H<sub>3</sub>; **15b**

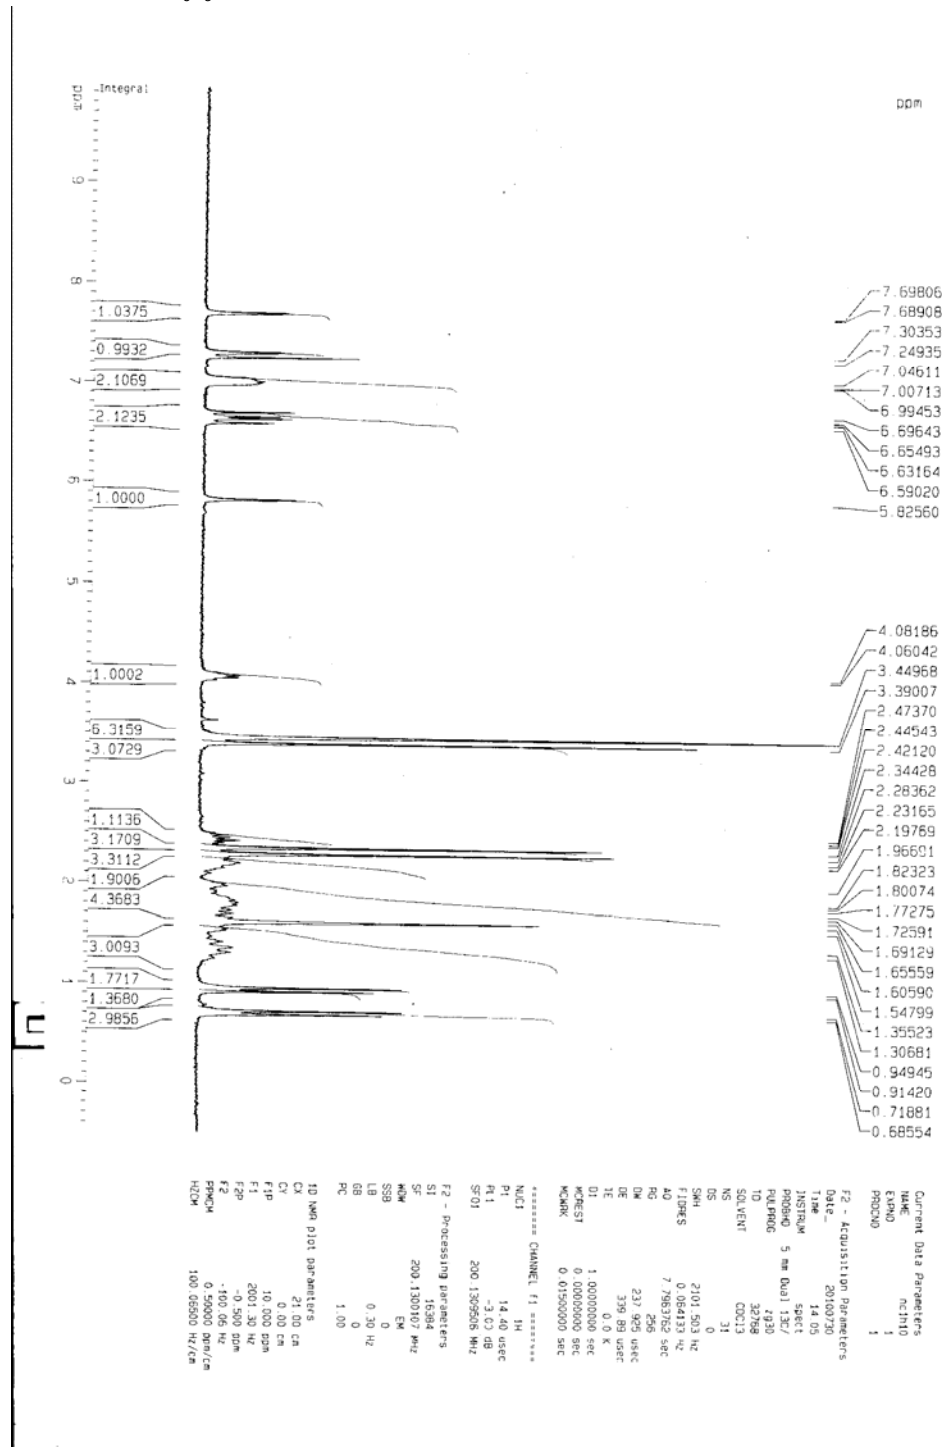

Figure-S48.  $^{13}\text{C}$  NMR spectrum of compound **15b**



Ar = 2-MeO-5-Me-C<sub>6</sub>H<sub>3</sub>; **15b**

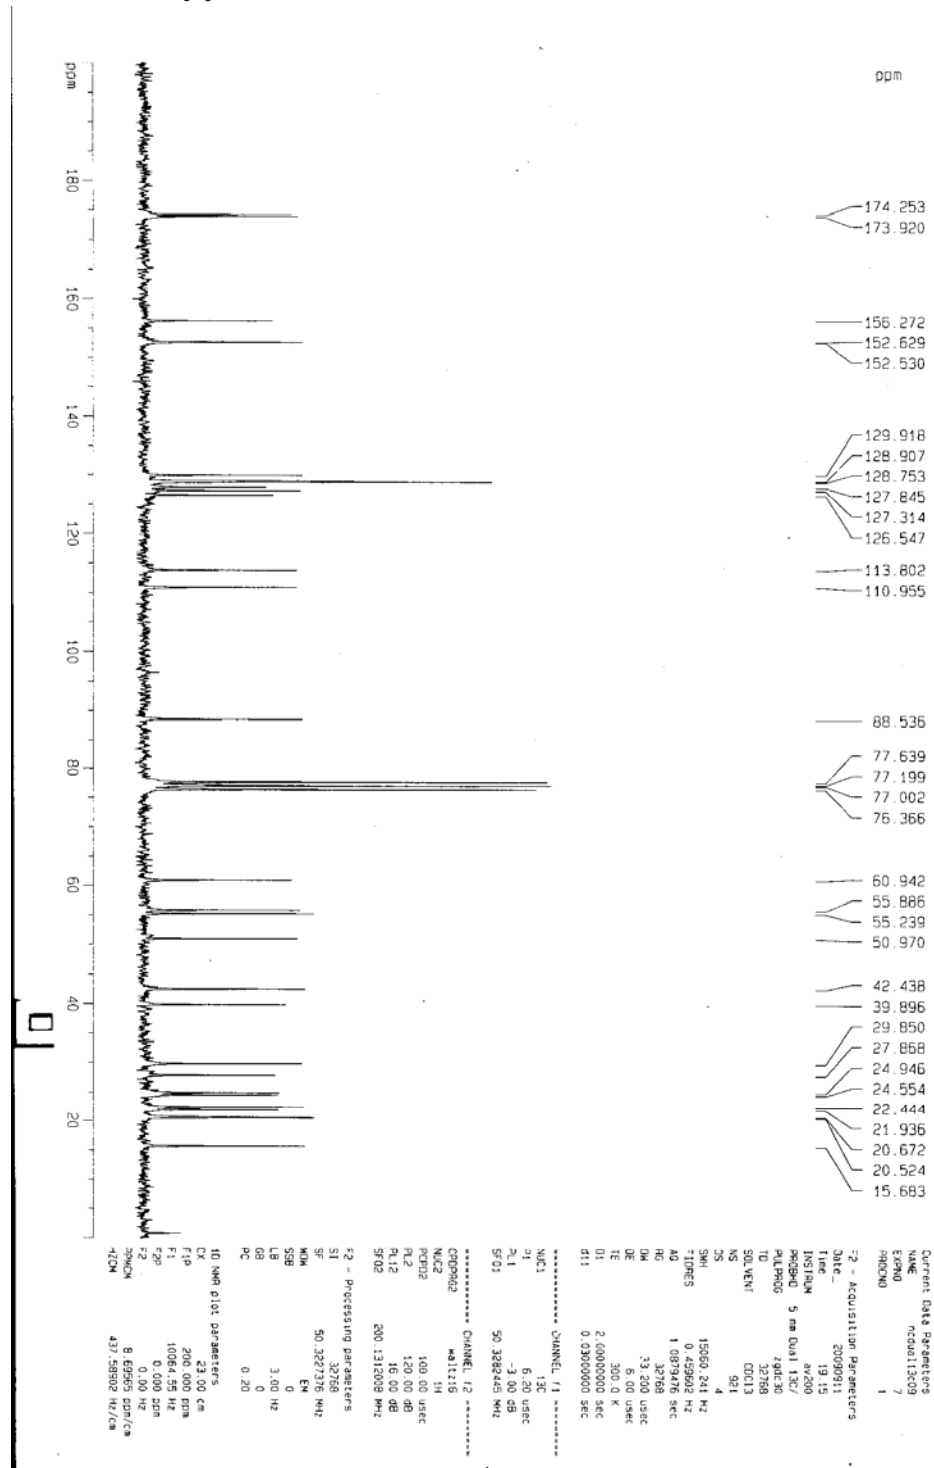

Figure-S49.  $^1\text{H}$  NMR (500 MHz) spectrum of compound **16b**

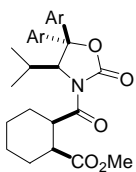

Ar = 2-MeO-5-Me-C<sub>6</sub>H<sub>3</sub>; **16b**

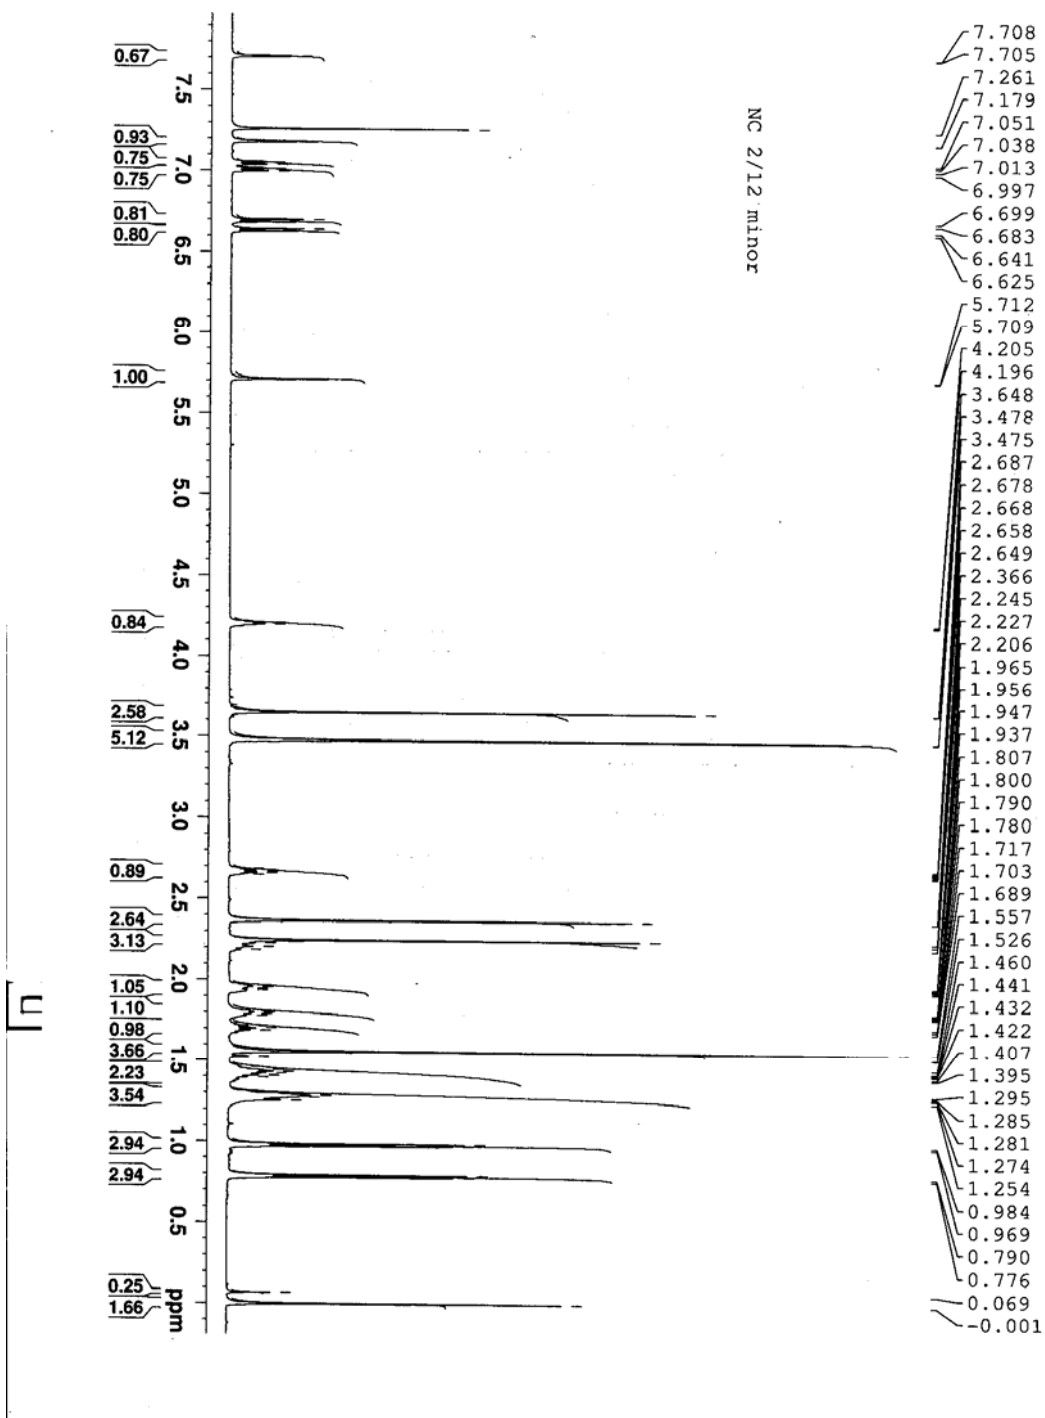

Figure-S50.  $^{13}\text{C}$  NMR (125 MHz) spectrum of compound **16b**

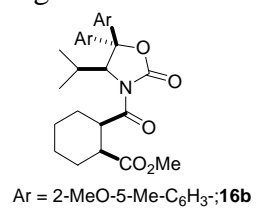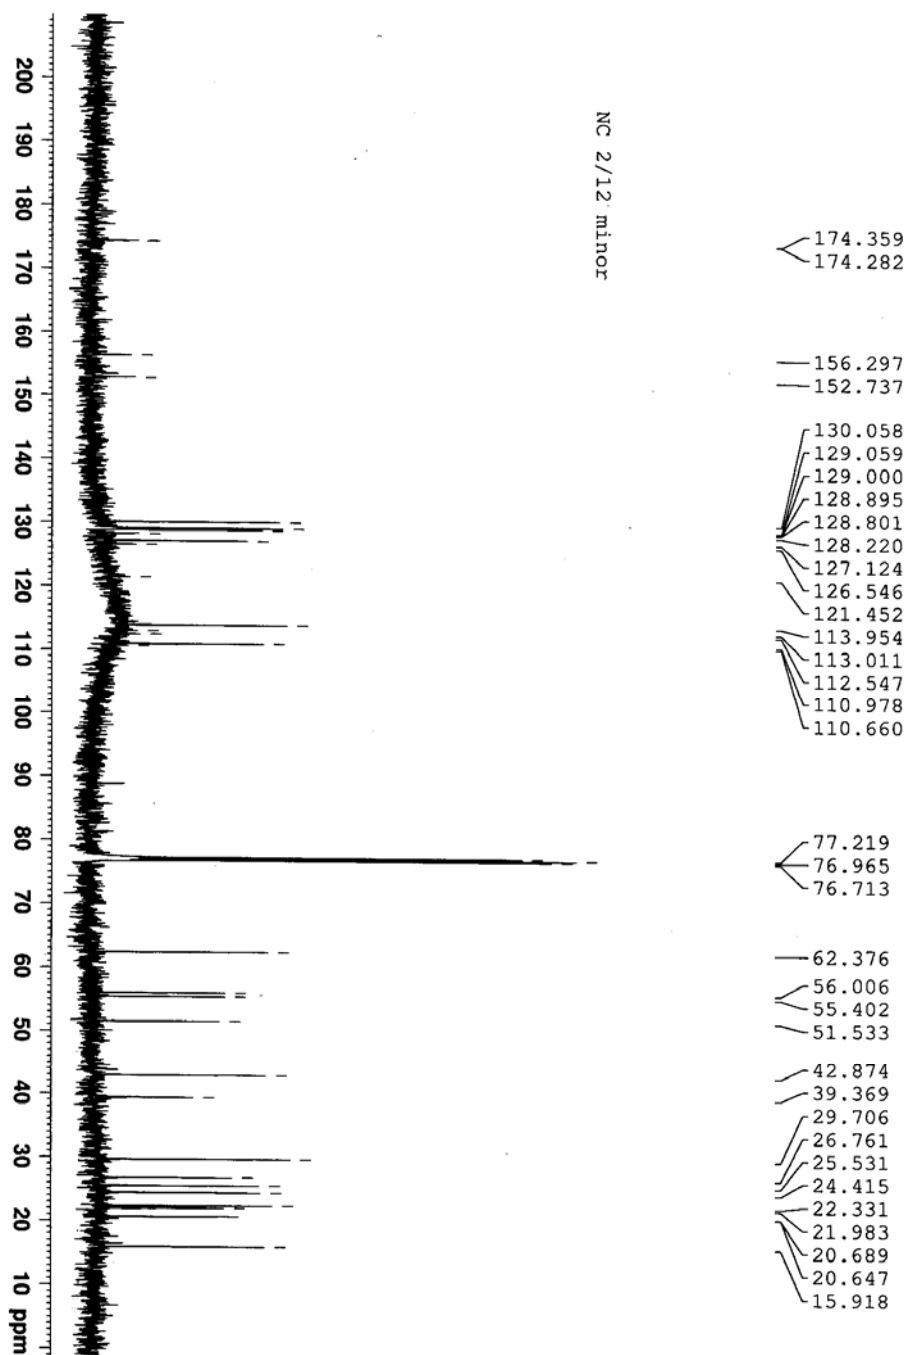

Supplement: c1ra00483b_2.pdf [file c1ra00483b_2.pdf]
